# Supplementary material for: Density of cannabis outlets vs. cannabis use behaviors and prevalent cannabis use disorder: findings from a nationally-representative survey
Source: PeerJ. 2024 Apr 29;12:e17317. doi: 10.7717/peerj.17317 (PMC11064851; doi:10.7717/peerj.17317)
Supplement: Supplemental Information 1 [file peerj-12-17317-s001.xlsx]

## Sheet: Suppl1_data
id	a1	a3	a4	a5	a6	a7	a9	b1_1	b1_3_year	b1_4	b1_8	b3_1	b3_2	b3_3	b3_4	b3_5	b3_6	b3_7	b3_8	b6_1	b6_2	c1_6_400m	c1_7_800m	c1_8_1200m	c1_9_1600m	weight	region	region_pop	swpop
1	1	47	4	1	5	3	2	1	20	1	2	8	9	9	0	0	0	9	9	3	4	3	3	3	3	23745.8	1 - Bangkok and Metro	7375247	22833.6
2	1	58	2	4	3	3	2	0	888	888	888	0	888	888	888	888	888	888	888	1	888	88	88	88	88	23346.2	1 - Bangkok and Metro	7375247	22833.6
3	1	56	2	1	5	3	2	1	25	1	2	0	888	888	888	888	888	888	888	2	4	88	88	88	88	23346.2	1 - Bangkok and Metro	7375247	22833.6
4	2	66	2	1	3	2	2	0	888	888	888	0	888	888	888	888	888	888	888	1	888	99	99	99	99	22866.3	1 - Bangkok and Metro	7375247	22833.6
5	2	50	2	1	5	3	2	0	888	888	888	0	888	888	888	888	888	888	888	1	888	99	99	99	99	22866.3	1 - Bangkok and Metro	7375247	22833.6
6	2	50	2	2	5	2	2	0	888	888	888	0	888	888	888	888	888	888	888	1	888	99	99	99	99	22866.3	1 - Bangkok and Metro	7375247	22833.6
7	2	70	1	1	3	2	2	0	888	888	888	0	888	888	888	888	888	888	888	1	888	99	99	1	1	22866.3	1 - Bangkok and Metro	7375247	22833.6
8	2	64	4	1	5	2	2	0	888	888	888	0	888	888	888	888	888	888	888	1	888	88	88	88	88	22866.3	1 - Bangkok and Metro	7375247	22833.6
9	2	67	2	1	6	1	2	0	888	888	888	0	888	888	888	888	888	888	888	1	888	88	88	88	88	22866.3	1 - Bangkok and Metro	7375247	22833.6
10	2	67	2	1	6	1	2	0	888	888	888	0	888	888	888	888	888	888	888	1	888	88	88	88	88	22866.3	1 - Bangkok and Metro	7375247	22833.6
11	2	59	2	3	3	2	2	0	888	888	888	0	888	888	888	888	888	888	888	1	888	88	88	88	88	22866.3	1 - Bangkok and Metro	7375247	22833.6
12	2	48	2	4	5	3	2	0	888	888	888	0	888	888	888	888	888	888	888	1	888	88	88	88	88	22134.8	1 - Bangkok and Metro	7375247	22833.6
13	2	45	3	1	6	1	2	0	888	888	888	0	888	888	888	888	888	888	888	1	888	88	88	88	1	22134.8	1 - Bangkok and Metro	7375247	22833.6
14	2	34	2	6	2	6	2	0	888	888	888	0	888	888	888	888	888	888	888	1	888	88	88	88	88	23892.3	1 - Bangkok and Metro	7375247	22833.6
15	2	27	1	4	2	3	2	0	888	888	888	0	888	888	888	888	888	888	888	1	888	88	88	88	88	22843.1	1 - Bangkok and Metro	7375247	22833.6
16	1	27	2	2	3	3	2	0	888	888	888	0	888	888	888	888	888	888	888	1	888	88	88	88	88	23157.3	1 - Bangkok and Metro	7375247	22833.6
17	1	78	2	1	6	1	2	0	888	888	888	0	888	888	888	888	888	888	888	2	1	99	99	99	99	23346.2	1 - Bangkok and Metro	7375247	22833.6
18	2	67	2	1	3	9	2	1	888	4	5	0	888	888	888	888	888	888	888	1	888	99	99	99	99	22866.3	1 - Bangkok and Metro	7375247	22833.6
19	2	45	4	3	5	4	2	1	18	1	5	0	888	888	888	888	888	888	888	1	888	99	99	99	99	22134.8	1 - Bangkok and Metro	7375247	22833.6
20	2	35	3	4	5	3	2	1	999	1	2	9	9	9	9	9	9	9	9	2	3	88	88	88	88	23892.3	1 - Bangkok and Metro	7375247	22833.6
21	2	36	3	1	5	3	2	1	36	1	5	1	10	0	0	0	0	0	0	1	888	99	99	99	99	23892.3	1 - Bangkok and Metro	7375247	22833.6
22	2	21	1	2	5	3	2	1	999	1	5	2	10	0	0	0	0	0	0	1	888	2	2	2	2	22843.1	1 - Bangkok and Metro	7375247	22833.6
23	1	45	2	4	3	2	2	1	33	1	5	0	888	888	888	888	888	888	888	1	888	88	88	88	88	23745.8	1 - Bangkok and Metro	7375247	22833.6
24	1	49	1	1	5	3	2	1	49	1	5	1	10	0	0	0	0	0	0	3	4	1	1	1	1	23745.8	1 - Bangkok and Metro	7375247	22833.6
25	1	45	3	3	1	4	2	1	26	4	5	1	10	0	0	0	0	0	9	2	1	1	1	1	1	23745.8	1 - Bangkok and Metro	7375247	22833.6
26	1	38	2	2	3	3	2	1	25	1	5	0	888	888	888	888	888	888	888	1	888	88	88	88	88	23638.7	1 - Bangkok and Metro	7375247	22833.6
27	1	37	1	2	9	7	2	1	19	1	2	1	10	0	0	0	0	0	0	3	4	2	2	2	2	23638.7	1 - Bangkok and Metro	7375247	22833.6
28	1	32	4	6	9	4	2	1	20	1	2	0	888	888	888	888	888	888	888	3	4	99	99	99	1	23638.7	1 - Bangkok and Metro	7375247	22833.6
29	1	26	1	2	9	3	2	1	25	1	2	9	1	9	9	9	0	9	9	2	1	99	99	99	99	23157.3	1 - Bangkok and Metro	7375247	22833.6
30	1	55	2	3	2	5	2	1	19	1	2	0	888	888	888	888	888	888	888	2	4	99	2	2	2	23346.2	1 - Bangkok and Metro	7375247	22833.6
31	1	64	3	1	3	7	2	1	888	4	5	0	888	888	888	888	888	888	888	3	1	99	99	99	99	23346.2	1 - Bangkok and Metro	7375247	22833.6
32	1	52	2	1	5	3	2	1	25	1	5	0	888	888	888	888	888	888	888	3	4	2	2	99	99	23346.2	1 - Bangkok and Metro	7375247	22833.6
33	1	58	2	1	5	3	2	1	20	1	2	1	10	0	0	0	0	0	0	3	4	99	99	99	99	23346.2	1 - Bangkok and Metro	7375247	22833.6
34	1	76	2	1	6	1	1	0	888	888	888	0	888	888	888	888	888	888	888	2	1	99	99	99	99	23346.2	1 - Bangkok and Metro	7375247	22833.6
35	1	60	2	2	9	4	2	0	888	888	888	0	888	888	888	888	888	888	888	2	1	99	99	99	99	23346.2	1 - Bangkok and Metro	7375247	22833.6
36	1	57	3	2	3	3	2	0	888	888	888	0	888	888	888	888	888	888	888	2	4	88	88	88	88	23346.2	1 - Bangkok and Metro	7375247	22833.6
37	1	47	3	4	9	3	2	0	888	888	888	0	888	888	888	888	888	888	888	2	4	88	88	88	88	23745.8	1 - Bangkok and Metro	7375247	22833.6
38	1	42	3	1	5	3	2	0	888	888	888	0	888	888	888	888	888	888	888	3	4	88	88	88	88	23745.8	1 - Bangkok and Metro	7375247	22833.6
39	1	37	1	3	2	3	2	0	888	888	888	0	888	888	888	888	888	888	888	2	3	88	88	88	88	23638.7	1 - Bangkok and Metro	7375247	22833.6
40	1	35	2	4	5	3	2	0	888	888	888	0	888	888	888	888	888	888	888	2	4	88	88	88	88	23638.7	1 - Bangkok and Metro	7375247	22833.6
41	1	37	2	3	2	4	1	0	888	888	888	0	888	888	888	888	888	888	888	1	888	99	99	99	99	23638.7	1 - Bangkok and Metro	7375247	22833.6
42	2	59	2	1	5	3	2	0	888	888	888	0	888	888	888	888	888	888	888	1	888	99	99	99	99	22866.3	1 - Bangkok and Metro	7375247	22833.6
43	2	61	2	1	5	2	2	0	888	888	888	0	888	888	888	888	888	888	888	1	888	99	99	99	99	22866.3	1 - Bangkok and Metro	7375247	22833.6
44	2	53	2	3	3	4	2	0	888	888	888	0	888	888	888	888	888	888	888	1	888	99	99	99	99	22866.3	1 - Bangkok and Metro	7375247	22833.6
45	2	67	2	2	3	2	2	0	888	888	888	0	888	888	888	888	888	888	888	1	888	99	99	99	1	22866.3	1 - Bangkok and Metro	7375247	22833.6
46	2	54	2	1	3	3	2	0	888	888	888	0	888	888	888	888	888	888	888	1	888	99	99	99	1	22866.3	1 - Bangkok and Metro	7375247	22833.6
47	2	70	2	1	6	1	2	0	888	888	888	0	888	888	888	888	888	888	888	1	888	88	88	88	88	22866.3	1 - Bangkok and Metro	7375247	22833.6
48	1	63	2	1	6	1	2	0	888	888	888	0	888	888	888	888	888	888	888	3	1	88	88	88	88	23346.2	1 - Bangkok and Metro	7375247	22833.6
49	2	65	2	1	6	2	2	0	888	888	888	0	888	888	888	888	888	888	888	2	1	88	88	88	88	22866.3	1 - Bangkok and Metro	7375247	22833.6
50	2	44	2	3	2	3	2	0	888	888	888	0	888	888	888	888	888	888	888	1	888	88	88	88	88	22134.8	1 - Bangkok and Metro	7375247	22833.6
51	2	47	2	3	2	3	2	0	888	888	888	0	888	888	888	888	888	888	888	1	888	88	88	88	88	22134.8	1 - Bangkok and Metro	7375247	22833.6
52	2	49	2	3	2	4	2	0	888	888	888	0	888	888	888	888	888	888	888	1	888	99	99	99	99	22134.8	1 - Bangkok and Metro	7375247	22833.6
53	2	41	2	6	3	5	2	0	888	888	888	0	888	888	888	888	888	888	888	1	888	99	99	99	99	22134.8	1 - Bangkok and Metro	7375247	22833.6
54	2	37	3	3	5	3	2	0	888	888	888	0	888	888	888	888	888	888	888	1	888	88	88	88	88	23892.3	1 - Bangkok and Metro	7375247	22833.6
55	2	36	3	3	8	3	2	0	888	888	888	0	888	888	888	888	888	888	888	1	888	88	88	88	88	23892.3	1 - Bangkok and Metro	7375247	22833.6
56	2	36	2	1	5	2	1	0	888	888	888	0	888	888	888	888	888	888	888	1	888	99	99	99	99	23892.3	1 - Bangkok and Metro	7375247	22833.6
57	2	27	1	3	3	3	2	0	888	888	888	0	888	888	888	888	888	888	888	1	888	88	88	88	88	22843.1	1 - Bangkok and Metro	7375247	22833.6
58	2	28	2	4	2	4	2	0	888	888	888	0	888	888	888	888	888	888	888	1	888	99	99	99	99	22843.1	1 - Bangkok and Metro	7375247	22833.6
59	2	24	1	6	2	5	2	0	888	888	888	0	888	888	888	888	888	888	888	1	888	88	88	88	88	22843.1	1 - Bangkok and Metro	7375247	22833.6
60	1	55	2	1	5	3	2	1	888	1	2	0	888	888	888	888	888	888	888	3	4	99	99	99	99	23346.2	1 - Bangkok and Metro	7375247	22833.6
61	1	57	2	2	4	7	2	1	17	4	5	0	888	888	888	888	888	888	888	3	1	99	99	99	99	23346.2	1 - Bangkok and Metro	7375247	22833.6
62	1	64	4	1	5	2	2	1	18	1	1	0	888	888	888	888	888	888	888	3	4	99	99	99	99	23346.2	1 - Bangkok and Metro	7375247	22833.6
63	1	54	2	1	5	3	2	1	20	1	1	0	888	888	888	888	888	888	888	3	4	99	99	99	99	23346.2	1 - Bangkok and Metro	7375247	22833.6
64	1	56	2	1	5	3	2	1	888	3	2	0	888	888	888	888	888	888	888	2	4	88	88	88	88	23346.2	1 - Bangkok and Metro	7375247	22833.6
65	1	48	4	3	3	3	1	1	28	1	1	0	888	888	888	888	888	888	888	3	4	99	99	99	99	23745.8	1 - Bangkok and Metro	7375247	22833.6
66	1	43	3	3	4	11	2	1	19	1	2	3	10	0	0	0	0	0	0	3	4	1	1	1	1	23745.8	1 - Bangkok and Metro	7375247	22833.6
67	1	32	1	2	5	4	2	1	17	1	4	8	1	4	0	4	9	9	4	3	4	2	2	2	2	23638.7	1 - Bangkok and Metro	7375247	22833.6
68	1	25	1	4	2	3	2	1	21	1	5	4	10	9	9	0	0	0	0	2	4	88	88	88	88	23157.3	1 - Bangkok and Metro	7375247	22833.6
69	1	21	1	3	9	3	2	1	20	1	2	0	888	888	888	888	888	888	888	2	4	1	1	1	1	23157.3	1 - Bangkok and Metro	7375247	22833.6
70	1	25	1	1	5	3	2	1	14	1	2	8	10	4	0	9	9	4	0	3	4	1	1	1	1	23157.3	1 - Bangkok and Metro	7375247	22833.6
71	2	66	2	1	3	3	2	1	888	4	5	0	888	888	888	888	888	888	888	1	888	88	88	88	88	22866.3	1 - Bangkok and Metro	7375247	22833.6
72	2	57	2	1	5	3	2	1	27	4	5	0	888	888	888	888	888	888	888	1	888	1	1	1	1	22866.3	1 - Bangkok and Metro	7375247	22833.6
73	2	60	4	1	5	2	2	1	888	4	5	0	888	888	888	888	888	888	888	1	888	1	1	1	1	22866.3	1 - Bangkok and Metro	7375247	22833.6
74	2	46	3	3	5	3	2	1	21	4	5	0	888	888	888	888	888	888	888	1	888	1	1	1	1	22134.8	1 - Bangkok and Metro	7375247	22833.6
75	2	36	3	2	5	3	2	1	36	1	5	1	10	0	0	0	0	9	9	1	888	99	99	99	99	23892.3	1 - Bangkok and Metro	7375247	22833.6
76	2	46	3	6	9	4	2	1	17	1	5	2	10	0	0	0	0	9	0	1	888	99	99	99	99	22134.8	1 - Bangkok and Metro	7375247	22833.6
77	2	26	2	1	3	3	2	0	888	888	888	0	888	888	888	888	888	888	888	1	888	88	88	88	88	22843.1	1 - Bangkok and Metro	7375247	22833.6
78	2	28	3	2	5	3	2	1	28	1	5	1	10	0	0	0	0	0	0	1	888	1	1	1	1	22843.1	1 - Bangkok and Metro	7375247	22833.6
79	2	21	1	4	10	2	2	0	888	888	888	0	888	888	888	888	888	888	888	1	888	88	88	88	88	22843.1	1 - Bangkok and Metro	7375247	22833.6
80	2	34	2	3	2	3	2	0	888	888	888	0	888	888	888	888	888	888	888	1	888	99	99	99	99	23892.3	1 - Bangkok and Metro	7375247	22833.6
81	2	34	2	2	2	3	2	0	888	888	888	0	888	888	888	888	888	888	888	1	888	99	99	99	99	23892.3	1 - Bangkok and Metro	7375247	22833.6
82	2	32	4	3	3	3	2	1	32	99	5	1	10	0	0	0	0	0	9	1	888	99	1	1	2	23892.3	1 - Bangkok and Metro	7375247	22833.6
83	2	46	3	6	9	5	2	1	34	4	5	0	888	888	888	888	888	888	888	1	888	99	99	99	99	22134.8	1 - Bangkok and Metro	7375247	22833.6
84	2	48	2	3	5	3	2	0	888	888	888	0	888	888	888	888	888	888	888	1	888	88	88	88	88	22134.8	1 - Bangkok and Metro	7375247	22833.6
85	2	48	2	4	2	5	2	0	888	888	888	0	888	888	888	888	888	888	888	1	888	99	99	99	99	22134.8	1 - Bangkok and Metro	7375247	22833.6
86	2	55	4	4	2	6	2	0	888	888	888	0	888	888	888	888	888	888	888	1	888	88	88	88	88	22866.3	1 - Bangkok and Metro	7375247	22833.6
87	2	63	2	1	6	4	2	0	888	888	888	0	888	888	888	888	888	888	888	2	2	88	88	88	88	22866.3	1 - Bangkok and Metro	7375247	22833.6
88	2	60	2	1	5	3	2	1	888	4	5	0	888	888	888	888	888	888	888	1	888	99	99	99	99	22866.3	1 - Bangkok and Metro	7375247	22833.6
89	2	56	2	1	5	3	2	1	34	4	5	0	888	888	888	888	888	888	888	1	888	1	1	1	1	22866.3	1 - Bangkok and Metro	7375247	22833.6
90	2	57	2	1	3	5	2	1	28	4	5	0	888	888	888	888	888	888	888	1	888	2	2	2	2	22866.3	1 - Bangkok and Metro	7375247	22833.6
91	2	56	3	1	3	4	2	0	888	888	888	0	888	888	888	888	888	888	888	1	888	88	88	88	1	22866.3	1 - Bangkok and Metro	7375247	22833.6
92	2	51	2	2	3	3	2	0	888	888	888	0	888	888	888	888	888	888	888	1	888	1	1	3	3	22866.3	1 - Bangkok and Metro	7375247	22833.6
93	1	27	2	4	2	4	2	1	25	1	5	0	888	888	888	888	888	888	888	2	1	0	0	0	0	23157.3	1 - Bangkok and Metro	7375247	22833.6
94	1	20	1	4	10	1	2	1	20	1	5	0	888	888	888	888	888	888	888	2	1	88	88	88	88	23157.3	1 - Bangkok and Metro	7375247	22833.6
95	1	24	1	2	5	3	2	1	23	1	2	7	0	9	0	0	0	0	9	3	4	99	99	99	99	23157.3	1 - Bangkok and Metro	7375247	22833.6
96	1	50	1	4	5	3	2	0	888	888	888	0	888	888	888	888	888	888	888	2	1	0	0	0	0	23346.2	1 - Bangkok and Metro	7375247	22833.6
97	1	52	2	1	5	3	2	0	888	888	888	0	888	888	888	888	888	888	888	3	4	99	99	99	99	23346.2	1 - Bangkok and Metro	7375247	22833.6
98	1	51	4	4	5	2	2	0	888	888	888	0	888	888	888	888	888	888	888	2	2	0	0	0	0	23346.2	1 - Bangkok and Metro	7375247	22833.6
99	1	39	2	4	2	6	2	0	888	888	888	0	888	888	888	888	888	888	888	3	4	99	99	99	99	23638.7	1 - Bangkok and Metro	7375247	22833.6
100	1	41	2	2	2	7	2	0	888	888	888	0	888	888	888	888	888	888	888	1	888	0	0	0	0	23745.8	1 - Bangkok and Metro	7375247	22833.6
101	1	44	2	4	5	3	1	1	18	1	2	0	888	888	888	888	888	888	888	3	1	99	99	2	2	23745.8	1 - Bangkok and Metro	7375247	22833.6
102	1	36	2	3	5	3	2	1	19	1	2	0	888	888	888	888	888	888	888	3	4	99	99	99	3	23638.7	1 - Bangkok and Metro	7375247	22833.6
103	1	43	4	3	4	11	2	1	33	1	2	0	888	888	888	888	888	888	888	3	4	1	1	1	1	23745.8	1 - Bangkok and Metro	7375247	22833.6
104	1	58	2	1	5	4	2	1	20	1	2	0	888	888	888	888	888	888	888	3	4	88	88	2	2	23346.2	1 - Bangkok and Metro	7375247	22833.6
105	1	63	4	1	5	2	2	1	55	1	2	1	10	0	0	0	0	0	0	3	4	2	2	2	2	23346.2	1 - Bangkok and Metro	7375247	22833.6
106	1	20	1	1	9	3	2	1	18	1	2	0	888	888	888	888	888	888	888	3	4	99	99	99	3	23157.3	1 - Bangkok and Metro	7375247	22833.6
107	1	50	2	1	5	3	2	1	30	1	5	0	888	888	888	888	888	888	888	2	4	88	88	88	88	23346.2	1 - Bangkok and Metro	7375247	22833.6
108	1	55	2	6	2	8	2	0	888	888	888	0	888	888	888	888	888	888	888	2	3	88	88	88	88	23346.2	1 - Bangkok and Metro	7375247	22833.6
109	1	51	2	3	9	3	2	0	888	888	888	0	888	888	888	888	888	888	888	2	1	99	99	99	99	23346.2	1 - Bangkok and Metro	7375247	22833.6
110	1	56	4	2	9	4	2	0	888	888	888	0	888	888	888	888	888	888	888	2	1	99	99	1	1	23346.2	1 - Bangkok and Metro	7375247	22833.6
111	1	65	2	1	3	9	2	0	888	888	888	0	888	888	888	888	888	888	888	3	1	88	88	88	88	23346.2	1 - Bangkok and Metro	7375247	22833.6
112	1	45	1	6	2	6	2	0	888	888	888	0	888	888	888	888	888	888	888	2	2	88	88	88	88	23745.8	1 - Bangkok and Metro	7375247	22833.6
113	1	30	1	1	2	4	2	0	888	888	888	0	888	888	888	888	888	888	888	2	3	99	99	99	99	23638.7	1 - Bangkok and Metro	7375247	22833.6
114	1	30	3	1	9	3	1	0	888	888	888	0	888	888	888	888	888	888	888	3	4	99	99	99	2	23638.7	1 - Bangkok and Metro	7375247	22833.6
115	2	51	2	1	3	2	1	0	888	888	888	0	888	888	888	888	888	888	888	1	888	99	99	99	99	22866.3	1 - Bangkok and Metro	7375247	22833.6
116	2	56	2	2	3	3	2	0	888	888	888	0	888	888	888	888	888	888	888	1	888	88	88	88	88	22866.3	1 - Bangkok and Metro	7375247	22833.6
117	2	65	2	2	6	2	2	0	888	888	888	0	888	888	888	888	888	888	888	1	888	88	88	88	88	22866.3	1 - Bangkok and Metro	7375247	22833.6
118	2	54	2	6	2	6	2	0	888	888	888	0	888	888	888	888	888	888	888	1	888	88	88	88	88	22866.3	1 - Bangkok and Metro	7375247	22833.6
119	2	58	2	1	6	1	2	0	888	888	888	0	888	888	888	888	888	888	888	1	888	88	88	1	1	22866.3	1 - Bangkok and Metro	7375247	22833.6
120	2	47	2	4	2	6	2	0	888	888	888	0	888	888	888	888	888	888	888	1	888	88	88	88	88	22134.8	1 - Bangkok and Metro	7375247	22833.6
121	2	49	2	4	2	4	2	0	888	888	888	0	888	888	888	888	888	888	888	1	888	88	88	88	88	22134.8	1 - Bangkok and Metro	7375247	22833.6
122	2	46	2	2	3	4	1	0	888	888	888	0	888	888	888	888	888	888	888	1	888	1	1	1	1	22134.8	1 - Bangkok and Metro	7375247	22833.6
123	2	30	2	4	3	3	2	0	888	888	888	0	888	888	888	888	888	888	888	1	888	88	88	88	88	23892.3	1 - Bangkok and Metro	7375247	22833.6
124	2	35	2	3	6	2	2	0	888	888	888	0	888	888	888	888	888	888	888	1	888	1	1	4	4	23892.3	1 - Bangkok and Metro	7375247	22833.6
125	1	61	3	1	3	4	2	1	30	1	1	0	888	888	888	888	888	888	888	2	4	99	99	99	99	23346.2	1 - Bangkok and Metro	7375247	22833.6
126	1	54	2	1	5	3	2	1	52	3	2	1	9	0	0	0	0	0	0	3	4	2	2	2	88	23346.2	1 - Bangkok and Metro	7375247	22833.6
127	1	34	2	3	9	3	2	1	25	1	2	2	2	0	9	0	0	0	9	3	4	99	99	99	3	23638.7	1 - Bangkok and Metro	7375247	22833.6
128	1	47	2	1	2	5	2	1	45	1	5	9	9	9	9	9	9	9	9	2	2	88	88	88	88	23745.8	1 - Bangkok and Metro	7375247	22833.6
129	1	48	2	1	5	3	2	1	20	1	2	0	888	888	888	888	888	888	888	2	4	99	99	99	99	23745.8	1 - Bangkok and Metro	7375247	22833.6
130	1	40	1	2	1	3	2	1	999	4	5	0	888	888	888	888	888	888	888	3	4	2	2	88	88	23745.8	1 - Bangkok and Metro	7375247	22833.6
131	1	53	2	1	5	3	2	1	999	4	5	0	888	888	888	888	888	888	888	1	888	2	88	88	88	23346.2	1 - Bangkok and Metro	7375247	22833.6
132	1	23	1	2	3	4	2	1	19	1	1	0	888	888	888	888	888	888	888	3	4	99	99	99	99	23157.3	1 - Bangkok and Metro	7375247	22833.6
133	1	22	1	3	5	3	2	1	18	1	1	9	1	9	9	9	9	0	9	3	4	99	99	99	99	23157.3	1 - Bangkok and Metro	7375247	22833.6
134	1	24	3	4	5	4	2	1	999	1	5	0	888	888	888	888	888	888	888	2	3	88	88	88	88	23157.3	1 - Bangkok and Metro	7375247	22833.6
135	1	35	1	3	9	8	2	1	20	1	5	2	10	0	0	0	0	9	9	3	4	88	88	88	88	23638.7	1 - Bangkok and Metro	7375247	22833.6
136	1	20	1	3	5	4	2	1	18	1	4	8	10	9	0	9	9	4	9	3	4	3	3	99	99	23157.3	1 - Bangkok and Metro	7375247	22833.6
137	2	62	4	1	5	2	2	1	30	4	5	0	888	888	888	888	888	888	888	1	888	99	99	99	99	22866.3	1 - Bangkok and Metro	7375247	22833.6
138	2	56	2	1	5	3	2	1	27	4	5	0	888	888	888	888	888	888	888	1	888	99	99	99	99	22866.3	1 - Bangkok and Metro	7375247	22833.6
139	2	50	1	1	5	2	2	1	28	1	2	0	888	888	888	888	888	888	888	3	4	99	99	99	99	22866.3	1 - Bangkok and Metro	7375247	22833.6
140	2	66	2	1	5	2	2	1	888	4	5	0	888	888	888	888	888	888	888	1	888	1	1	1	1	22866.3	1 - Bangkok and Metro	7375247	22833.6
141	2	56	2	2	5	3	2	1	25	1	5	0	888	888	888	888	888	888	888	3	4	99	99	99	99	22866.3	1 - Bangkok and Metro	7375247	22833.6
142	2	47	2	3	5	3	2	1	19	4	5	0	888	888	888	888	888	888	888	1	888	99	99	99	99	22134.8	1 - Bangkok and Metro	7375247	22833.6
143	2	45	3	6	9	5	2	1	45	1	5	1	10	0	0	0	0	0	0	1	888	2	2	88	88	22134.8	1 - Bangkok and Metro	7375247	22833.6
144	2	30	2	3	5	3	2	1	30	1	5	1	10	0	0	0	0	0	9	1	888	99	99	99	99	23892.3	1 - Bangkok and Metro	7375247	22833.6
145	2	31	3	6	2	5	2	1	22	4	5	0	888	888	888	888	888	888	888	1	888	99	99	99	99	23892.3	1 - Bangkok and Metro	7375247	22833.6
146	2	28	2	6	2	3	2	1	20	1	5	0	888	888	888	888	888	888	888	1	888	88	88	88	88	22843.1	1 - Bangkok and Metro	7375247	22833.6
147	2	27	2	2	2	3	2	1	25	1	5	0	888	888	888	888	888	888	888	2	2	88	88	88	88	22843.1	1 - Bangkok and Metro	7375247	22833.6
148	2	26	2	6	3	5	2	1	25	99	5	1	10	0	0	0	0	0	9	2	1	1	1	2	3	22843.1	1 - Bangkok and Metro	7375247	22833.6
149	2	28	3	2	5	3	2	1	28	1	5	1	10	0	0	0	0	0	0	1	888	1	1	1	88	22843.1	1 - Bangkok and Metro	7375247	22833.6
150	2	47	2	3	3	4	2	1	45	3	6	0	888	888	888	888	888	888	888	3	4	99	99	99	99	22134.8	1 - Bangkok and Metro	7375247	22833.6
151	1	24	1	2	2	4	2	0	888	888	888	0	888	888	888	888	888	888	888	1	888	88	88	88	88	23157.3	1 - Bangkok and Metro	7375247	22833.6
152	1	20	1	2	9	4	2	0	888	888	888	0	888	888	888	888	888	888	888	3	1	88	88	88	88	23157.3	1 - Bangkok and Metro	7375247	22833.6
153	1	32	1	1	9	4	2	0	888	888	888	0	888	888	888	888	888	888	888	3	4	88	88	88	88	23638.7	1 - Bangkok and Metro	7375247	22833.6
154	1	36	2	3	5	4	2	0	888	888	888	0	888	888	888	888	888	888	888	3	4	88	88	88	88	23638.7	1 - Bangkok and Metro	7375247	22833.6
155	2	22	1	2	2	4	2	0	888	888	888	0	888	888	888	888	888	888	888	1	888	88	88	88	88	22843.1	1 - Bangkok and Metro	7375247	22833.6
156	2	25	2	3	2	4	1	0	888	888	888	0	888	888	888	888	888	888	888	2	1	88	88	88	88	22843.1	1 - Bangkok and Metro	7375247	22833.6
157	2	26	1	4	2	5	2	0	888	888	888	0	888	888	888	888	888	888	888	1	888	88	88	88	88	22843.1	1 - Bangkok and Metro	7375247	22833.6
158	2	35	2	4	2	5	2	0	888	888	888	0	888	888	888	888	888	888	888	1	888	88	88	88	88	23892.3	1 - Bangkok and Metro	7375247	22833.6
159	2	47	2	1	3	3	2	0	888	888	888	0	888	888	888	888	888	888	888	2	1	88	88	88	88	22134.8	1 - Bangkok and Metro	7375247	22833.6
160	2	48	4	2	3	3	2	0	888	888	888	0	888	888	888	888	888	888	888	1	888	88	88	88	88	22134.8	1 - Bangkok and Metro	7375247	22833.6
161	2	36	2	4	2	5	2	0	888	888	888	0	888	888	888	888	888	888	888	1	888	88	88	88	88	23892.3	1 - Bangkok and Metro	7375247	22833.6
162	1	41	2	4	2	5	2	0	888	888	888	0	888	888	888	888	888	888	888	2	1	88	88	88	88	23745.8	1 - Bangkok and Metro	7375247	22833.6
163	1	44	2	1	9	4	2	0	888	888	888	0	888	888	888	888	888	888	888	2	1	88	88	88	88	23745.8	1 - Bangkok and Metro	7375247	22833.6
164	1	42	1	2	3	3	2	0	888	888	888	0	888	888	888	888	888	888	888	3	4	88	88	88	88	23745.8	1 - Bangkok and Metro	7375247	22833.6
165	1	62	2	1	6	1	2	0	888	888	888	0	888	888	888	888	888	888	888	3	4	88	88	88	88	23346.2	1 - Bangkok and Metro	7375247	22833.6
166	1	55	2	1	5	3	2	0	888	888	888	0	888	888	888	888	888	888	888	3	4	88	88	88	88	23346.2	1 - Bangkok and Metro	7375247	22833.6
167	1	65	2	1	6	1	2	0	888	888	888	0	888	888	888	888	888	888	888	3	1	88	88	88	88	23346.2	1 - Bangkok and Metro	7375247	22833.6
168	1	68	4	1	6	1	2	0	888	888	888	0	888	888	888	888	888	888	888	3	1	88	88	88	88	23346.2	1 - Bangkok and Metro	7375247	22833.6
169	2	59	2	1	3	3	2	0	888	888	888	0	888	888	888	888	888	888	888	1	888	88	88	88	88	22866.3	1 - Bangkok and Metro	7375247	22833.6
170	2	61	2	1	6	1	2	0	888	888	888	0	888	888	888	888	888	888	888	1	888	88	88	88	88	22866.3	1 - Bangkok and Metro	7375247	22833.6
171	2	68	4	1	6	1	2	0	888	888	888	0	888	888	888	888	888	888	888	1	888	88	88	88	88	22866.3	1 - Bangkok and Metro	7375247	22833.6
172	2	69	2	1	6	1	2	0	888	888	888	0	888	888	888	888	888	888	888	1	888	88	88	88	88	22866.3	1 - Bangkok and Metro	7375247	22833.6
173	2	58	1	1	3	3	2	0	888	888	888	0	888	888	888	888	888	888	888	1	888	88	88	88	88	22866.3	1 - Bangkok and Metro	7375247	22833.6
174	2	69	2	1	3	3	2	0	888	888	888	0	888	888	888	888	888	888	888	1	888	88	88	88	88	22866.3	1 - Bangkok and Metro	7375247	22833.6
175	2	68	3	1	6	1	2	0	888	888	888	0	888	888	888	888	888	888	888	1	888	88	88	88	88	22866.3	1 - Bangkok and Metro	7375247	22833.6
176	2	65	4	1	6	1	2	0	888	888	888	0	888	888	888	888	888	888	888	1	888	88	88	88	88	22866.3	1 - Bangkok and Metro	7375247	22833.6
177	1	66	4	1	6	1	2	0	888	888	888	0	888	888	888	888	888	888	888	3	1	88	88	88	88	23346.2	1 - Bangkok and Metro	7375247	22833.6
178	1	55	2	1	5	4	2	1	18	1	3	0	888	888	888	888	888	888	888	3	4	88	88	88	88	23346.2	1 - Bangkok and Metro	7375247	22833.6
179	2	49	2	1	3	99	2	0	888	888	888	0	888	888	888	888	888	888	888	1	888	88	88	88	88	22134.8	1 - Bangkok and Metro	7375247	22833.6
180	2	44	4	1	3	2	2	0	888	888	888	0	888	888	888	888	888	888	888	1	888	88	88	88	88	22134.8	1 - Bangkok and Metro	7375247	22833.6
181	2	32	3	3	3	2	2	0	888	888	888	0	888	888	888	888	888	888	888	1	888	88	88	88	88	23892.3	1 - Bangkok and Metro	7375247	22833.6
182	2	38	2	2	3	3	2	0	888	888	888	0	888	888	888	888	888	888	888	1	888	88	88	88	88	23892.3	1 - Bangkok and Metro	7375247	22833.6
183	2	36	2	2	6	2	2	0	888	888	888	0	888	888	888	888	888	888	888	1	888	88	88	88	88	23892.3	1 - Bangkok and Metro	7375247	22833.6
184	2	29	2	2	5	3	2	0	888	888	888	0	888	888	888	888	888	888	888	1	888	88	88	88	88	22843.1	1 - Bangkok and Metro	7375247	22833.6
185	2	26	3	2	2	3	2	0	888	888	888	0	888	888	888	888	888	888	888	1	888	88	88	88	88	22843.1	1 - Bangkok and Metro	7375247	22833.6
186	1	53	2	1	5	2	2	0	888	888	888	0	888	888	888	888	888	888	888	3	4	88	88	88	88	23346.2	1 - Bangkok and Metro	7375247	22833.6
187	1	63	2	1	6	1	2	0	888	888	888	0	888	888	888	888	888	888	888	1	888	88	88	88	88	23346.2	1 - Bangkok and Metro	7375247	22833.6
188	1	57	2	1	3	2	2	0	888	888	888	0	888	888	888	888	888	888	888	3	4	88	88	88	88	23346.2	1 - Bangkok and Metro	7375247	22833.6
189	1	56	2	1	5	3	2	0	888	888	888	0	888	888	888	888	888	888	888	3	4	88	88	88	88	23346.2	1 - Bangkok and Metro	7375247	22833.6
190	1	61	2	4	3	3	2	0	888	888	888	0	888	888	888	888	888	888	888	1	888	88	88	88	88	23346.2	1 - Bangkok and Metro	7375247	22833.6
191	1	42	2	2	5	4	2	0	888	888	888	0	888	888	888	888	888	888	888	3	4	88	88	88	88	23745.8	1 - Bangkok and Metro	7375247	22833.6
192	2	49	2	1	3	2	2	0	888	888	888	0	888	888	888	888	888	888	888	1	888	88	88	88	88	22134.8	1 - Bangkok and Metro	7375247	22833.6
193	1	24	2	1	9	3	2	1	17	1	4	0	888	888	888	888	888	888	888	3	4	88	88	1	88	23157.3	1 - Bangkok and Metro	7375247	22833.6
194	2	64	2	1	6	1	2	0	888	888	888	0	888	888	888	888	888	888	888	1	888	88	88	88	88	22866.3	1 - Bangkok and Metro	7375247	22833.6
195	2	59	2	1	6	1	2	0	888	888	888	0	888	888	888	888	888	888	888	1	888	99	99	99	99	22866.3	1 - Bangkok and Metro	7375247	22833.6
196	1	35	2	1	3	2	2	0	888	888	888	0	888	888	888	888	888	888	888	3	4	99	99	99	99	23638.7	1 - Bangkok and Metro	7375247	22833.6
197	2	67	2	1	6	2	2	0	888	888	888	0	888	888	888	888	888	888	888	1	888	88	88	88	88	22866.3	1 - Bangkok and Metro	7375247	22833.6
198	1	68	2	1	5	1	2	0	888	888	888	0	888	888	888	888	888	888	888	3	4	88	88	88	88	23346.2	1 - Bangkok and Metro	7375247	22833.6
199	2	47	2	1	3	2	2	0	888	888	888	0	888	888	888	888	888	888	888	1	888	88	88	88	88	22134.8	1 - Bangkok and Metro	7375247	22833.6
200	2	69	2	1	3	2	2	0	888	888	888	0	888	888	888	888	888	888	888	1	888	88	88	88	88	22866.3	1 - Bangkok and Metro	7375247	22833.6
201	2	60	2	1	3	2	2	0	888	888	888	0	888	888	888	888	888	888	888	1	888	88	88	1	88	22866.3	1 - Bangkok and Metro	7375247	22833.6
202	2	64	2	1	3	3	2	0	888	888	888	0	888	888	888	888	888	888	888	1	888	88	88	88	88	22866.3	1 - Bangkok and Metro	7375247	22833.6
203	2	63	2	1	5	2	2	0	888	888	888	0	888	888	888	888	888	888	888	1	888	88	88	88	88	22866.3	1 - Bangkok and Metro	7375247	22833.6
204	2	65	2	1	6	1	2	0	888	888	888	0	888	888	888	888	888	888	888	1	888	88	88	88	88	22866.3	1 - Bangkok and Metro	7375247	22833.6
205	1	37	2	1	5	3	2	0	888	888	888	0	888	888	888	888	888	888	888	1	888	88	88	1	88	23638.7	1 - Bangkok and Metro	7375247	22833.6
206	1	28	3	1	5	3	2	1	19	1	4	0	888	888	888	888	888	888	888	3	4	88	88	1	88	23157.3	1 - Bangkok and Metro	7375247	22833.6
207	1	39	2	2	2	3	2	0	888	888	888	0	888	888	888	888	888	888	888	1	888	88	88	88	88	23638.7	1 - Bangkok and Metro	7375247	22833.6
208	1	46	2	4	5	4	2	0	888	888	888	0	888	888	888	888	888	888	888	3	4	88	88	1	88	23745.8	1 - Bangkok and Metro	7375247	22833.6
209	2	56	4	1	3	3	2	0	888	888	888	0	888	888	888	888	888	888	888	1	888	88	88	88	88	22866.3	1 - Bangkok and Metro	7375247	22833.6
210	2	45	2	3	3	4	2	0	888	888	888	0	888	888	888	888	888	888	888	1	888	88	88	88	88	22134.8	1 - Bangkok and Metro	7375247	22833.6
211	1	22	1	1	2	4	2	0	888	888	888	0	888	888	888	888	888	888	888	2	1	1	88	88	88	23157.3	1 - Bangkok and Metro	7375247	22833.6
212	2	64	2	1	6	1	2	0	888	888	888	0	888	888	888	888	888	888	888	1	888	88	88	88	88	22866.3	1 - Bangkok and Metro	7375247	22833.6
213	2	65	4	1	6	1	2	0	888	888	888	0	888	888	888	888	888	888	888	1	888	88	88	88	88	22866.3	1 - Bangkok and Metro	7375247	22833.6
214	1	62	1	1	6	1	2	1	16	1	1	0	888	888	888	888	888	888	888	3	1	88	88	88	88	23346.2	1 - Bangkok and Metro	7375247	22833.6
215	2	60	2	1	6	1	2	0	888	888	888	0	888	888	888	888	888	888	888	1	888	88	88	88	88	22866.3	1 - Bangkok and Metro	7375247	22833.6
216	1	60	2	1	6	1	2	0	888	888	888	0	888	888	888	888	888	888	888	3	1	88	88	88	88	23346.2	1 - Bangkok and Metro	7375247	22833.6
217	1	64	2	1	6	1	2	0	888	888	888	0	888	888	888	888	888	888	888	3	1	88	88	88	1	23346.2	1 - Bangkok and Metro	7375247	22833.6
218	1	64	2	1	3	3	2	0	888	888	888	0	888	888	888	888	888	888	888	3	1	88	88	88	88	23346.2	1 - Bangkok and Metro	7375247	22833.6
219	2	65	4	1	3	3	2	0	888	888	888	0	888	888	888	888	888	888	888	1	888	88	88	88	88	22866.3	1 - Bangkok and Metro	7375247	22833.6
220	2	43	2	2	3	3	2	0	888	888	888	0	888	888	888	888	888	888	888	1	888	88	88	88	88	22134.8	1 - Bangkok and Metro	7375247	22833.6
221	2	58	1	1	3	3	2	0	888	888	888	0	888	888	888	888	888	888	888	1	888	88	88	88	88	22866.3	1 - Bangkok and Metro	7375247	22833.6
222	1	56	2	3	3	4	2	0	888	888	888	0	888	888	888	888	888	888	888	3	4	88	88	88	88	23346.2	1 - Bangkok and Metro	7375247	22833.6
223	2	58	1	1	3	3	2	0	888	888	888	0	888	888	888	888	888	888	888	1	888	88	88	88	88	22866.3	1 - Bangkok and Metro	7375247	22833.6
224	2	40	2	1	3	4	2	0	888	888	888	0	888	888	888	888	888	888	888	1	888	88	88	88	88	22134.8	1 - Bangkok and Metro	7375247	22833.6
225	1	30	1	1	5	4	2	0	888	888	888	0	888	888	888	888	888	888	888	2	1	88	88	88	88	23638.7	1 - Bangkok and Metro	7375247	22833.6
226	1	37	2	2	2	5	2	0	888	888	888	0	888	888	888	888	888	888	888	1	888	88	1	88	88	23638.7	1 - Bangkok and Metro	7375247	22833.6
227	1	23	1	2	9	4	2	1	22	3	1	8	1	0	0	0	0	0	0	3	4	88	1	88	88	23157.3	1 - Bangkok and Metro	7375247	22833.6
228	1	40	2	4	9	4	2	0	888	888	888	0	888	888	888	888	888	888	888	2	1	1	88	88	88	23745.8	1 - Bangkok and Metro	7375247	22833.6
229	1	45	2	2	5	3	2	0	888	888	888	0	888	888	888	888	888	888	888	2	1	1	88	88	88	23745.8	1 - Bangkok and Metro	7375247	22833.6
230	1	44	2	2	9	4	2	0	888	888	888	0	888	888	888	888	888	888	888	2	1	1	88	88	88	23745.8	1 - Bangkok and Metro	7375247	22833.6
231	2	29	1	3	2	4	2	0	888	888	888	0	888	888	888	888	888	888	888	1	888	88	1	88	88	22843.1	1 - Bangkok and Metro	7375247	22833.6
232	2	25	1	2	2	4	2	0	888	888	888	0	888	888	888	888	888	888	888	1	888	1	88	88	88	22843.1	1 - Bangkok and Metro	7375247	22833.6
233	2	32	2	2	3	3	2	0	888	888	888	0	888	888	888	888	888	888	888	2	1	88	88	88	88	23892.3	1 - Bangkok and Metro	7375247	22833.6
234	2	30	1	4	2	4	2	0	888	888	888	0	888	888	888	888	888	888	888	1	888	88	1	88	88	23892.3	1 - Bangkok and Metro	7375247	22833.6
235	2	59	2	1	3	3	2	0	888	888	888	0	888	888	888	888	888	888	888	1	888	88	88	88	88	22866.3	1 - Bangkok and Metro	7375247	22833.6
236	2	60	2	1	6	1	2	0	888	888	888	0	888	888	888	888	888	888	888	1	888	1	88	88	88	22866.3	1 - Bangkok and Metro	7375247	22833.6
237	2	67	2	1	3	2	2	0	888	888	888	0	888	888	888	888	888	888	888	1	888	88	88	88	88	22866.3	1 - Bangkok and Metro	7375247	22833.6
238	1	59	2	4	6	1	2	0	888	888	888	0	888	888	888	888	888	888	888	1	888	88	88	88	88	23346.2	1 - Bangkok and Metro	7375247	22833.6
239	1	65	2	1	6	1	2	0	888	888	888	0	888	888	888	888	888	888	888	1	888	88	88	88	88	23346.2	1 - Bangkok and Metro	7375247	22833.6
240	2	59	2	1	6	1	2	0	888	888	888	0	888	888	888	888	888	888	888	1	888	88	88	88	88	22866.3	1 - Bangkok and Metro	7375247	22833.6
241	1	64	2	1	3	3	2	0	888	888	888	0	888	888	888	888	888	888	888	1	888	88	88	88	88	23346.2	1 - Bangkok and Metro	7375247	22833.6
242	1	25	1	6	2	3	2	0	888	888	888	0	888	888	888	888	888	888	888	3	4	99	99	99	99	23157.3	1 - Bangkok and Metro	7375247	22833.6
243	2	45	4	6	8	7	2	0	888	888	888	0	888	888	888	888	888	888	888	1	888	88	88	88	88	22134.8	1 - Bangkok and Metro	7375247	22833.6
244	2	36	2	3	3	2	2	0	888	888	888	0	888	888	888	888	888	888	888	1	888	88	88	88	88	23892.3	1 - Bangkok and Metro	7375247	22833.6
245	2	22	1	5	10	2	2	0	888	888	888	0	888	888	888	888	888	888	888	1	888	88	88	88	88	22843.1	1 - Bangkok and Metro	7375247	22833.6
246	2	25	1	6	2	4	2	0	888	888	888	0	888	888	888	888	888	888	888	1	888	88	88	88	88	22843.1	1 - Bangkok and Metro	7375247	22833.6
247	2	42	1	2	3	3	2	0	888	888	888	0	888	888	888	888	888	888	888	1	888	88	88	88	88	22134.8	1 - Bangkok and Metro	7375247	22833.6
248	2	30	1	1	3	3	2	0	888	888	888	0	888	888	888	888	888	888	888	1	888	88	88	88	88	23892.3	1 - Bangkok and Metro	7375247	22833.6
249	2	48	2	1	3	2	2	0	888	888	888	0	888	888	888	888	888	888	888	1	888	88	88	88	88	22134.8	1 - Bangkok and Metro	7375247	22833.6
250	2	68	2	1	6	1	2	0	888	888	888	0	888	888	888	888	888	888	888	1	888	88	88	88	88	22866.3	1 - Bangkok and Metro	7375247	22833.6
251	2	64	2	1	6	1	2	0	888	888	888	0	888	888	888	888	888	888	888	1	888	88	88	88	88	22866.3	1 - Bangkok and Metro	7375247	22833.6
252	2	61	2	1	3	2	2	0	888	888	888	0	888	888	888	888	888	888	888	1	888	88	88	88	88	22866.3	1 - Bangkok and Metro	7375247	22833.6
253	1	32	2	3	5	3	2	0	888	888	888	0	888	888	888	888	888	888	888	1	888	1	88	88	88	23638.7	1 - Bangkok and Metro	7375247	22833.6
254	1	36	2	4	9	3	2	0	888	888	888	0	888	888	888	888	888	888	888	3	4	88	1	88	88	23638.7	1 - Bangkok and Metro	7375247	22833.6
255	1	45	2	2	5	3	2	0	888	888	888	0	888	888	888	888	888	888	888	3	4	88	88	88	88	23745.8	1 - Bangkok and Metro	7375247	22833.6
256	1	48	2	3	5	3	2	0	888	888	888	0	888	888	888	888	888	888	888	1	888	88	88	88	88	23745.8	1 - Bangkok and Metro	7375247	22833.6
257	1	46	2	4	5	3	2	0	888	888	888	0	888	888	888	888	888	888	888	3	4	88	1	88	88	23745.8	1 - Bangkok and Metro	7375247	22833.6
258	1	61	2	4	3	2	2	0	888	888	888	0	888	888	888	888	888	888	888	1	888	88	1	88	88	23346.2	1 - Bangkok and Metro	7375247	22833.6
259	1	56	2	3	5	3	2	0	888	888	888	0	888	888	888	888	888	888	888	3	4	88	1	88	88	23346.2	1 - Bangkok and Metro	7375247	22833.6
260	1	28	3	1	5	3	2	0	888	888	888	0	888	888	888	888	888	888	888	1	888	88	88	88	88	23157.3	1 - Bangkok and Metro	7375247	22833.6
261	2	45	2	2	2	4	2	0	888	888	888	0	888	888	888	888	888	888	888	1	888	0	0	0	0	22134.8	1 - Bangkok and Metro	7375247	22833.6
262	2	23	1	6	9	5	2	0	888	888	888	0	888	888	888	888	888	888	888	1	888	88	88	88	88	22843.1	1 - Bangkok and Metro	7375247	22833.6
263	2	22	1	6	9	4	2	0	888	888	888	0	888	888	888	888	888	888	888	1	888	99	99	99	99	22843.1	1 - Bangkok and Metro	7375247	22833.6
264	1	23	1	4	5	4	2	1	20	1	2	0	888	888	888	888	888	888	888	3	4	88	88	88	88	23157.3	1 - Bangkok and Metro	7375247	22833.6
265	1	26	1	3	9	3	2	0	888	888	888	0	888	888	888	888	888	888	888	3	4	88	88	88	88	23157.3	1 - Bangkok and Metro	7375247	22833.6
266	1	21	1	5	10	2	2	1	20	1	1	9	9	9	0	0	0	0	4	3	4	88	88	88	88	23157.3	1 - Bangkok and Metro	7375247	22833.6
267	2	33	2	3	2	3	2	0	888	888	888	0	888	888	888	888	888	888	888	1	888	88	88	88	88	23892.3	1 - Bangkok and Metro	7375247	22833.6
268	2	38	2	3	3	3	2	0	888	888	888	0	888	888	888	888	888	888	888	1	888	88	88	88	88	23892.3	1 - Bangkok and Metro	7375247	22833.6
269	1	35	1	4	5	4	2	0	888	888	888	0	888	888	888	888	888	888	888	3	4	88	88	88	88	23638.7	1 - Bangkok and Metro	7375247	22833.6
270	1	33	1	6	3	3	2	0	888	888	888	0	888	888	888	888	888	888	888	3	4	99	99	99	99	23638.7	1 - Bangkok and Metro	7375247	22833.6
271	1	38	2	4	2	4	2	0	888	888	888	0	888	888	888	888	888	888	888	3	4	88	88	88	88	23638.7	1 - Bangkok and Metro	7375247	22833.6
272	2	46	2	2	3	5	2	0	888	888	888	0	888	888	888	888	888	888	888	1	888	88	88	1	2	22134.8	1 - Bangkok and Metro	7375247	22833.6
273	2	46	2	4	2	4	2	0	888	888	888	0	888	888	888	888	888	888	888	1	888	88	88	88	88	22134.8	1 - Bangkok and Metro	7375247	22833.6
274	2	48	2	4	2	4	2	0	888	888	888	0	888	888	888	888	888	888	888	1	888	88	88	88	88	22134.8	1 - Bangkok and Metro	7375247	22833.6
275	1	48	2	3	5	3	2	0	888	888	888	0	888	888	888	888	888	888	888	3	4	88	88	88	88	23745.8	1 - Bangkok and Metro	7375247	22833.6
276	1	45	2	2	5	3	2	0	888	888	888	0	888	888	888	888	888	888	888	3	4	88	88	88	2	23745.8	1 - Bangkok and Metro	7375247	22833.6
277	2	50	2	2	3	6	2	0	888	888	888	0	888	888	888	888	888	888	888	1	888	88	88	88	88	22866.3	1 - Bangkok and Metro	7375247	22833.6
278	2	59	2	1	3	5	2	0	888	888	888	0	888	888	888	888	888	888	888	1	888	99	99	99	99	22866.3	1 - Bangkok and Metro	7375247	22833.6
279	2	54	2	2	3	6	3	0	888	888	888	0	888	888	888	888	888	888	888	1	888	88	88	88	88	22866.3	1 - Bangkok and Metro	7375247	22833.6
280	2	67	2	2	6	1	2	0	888	888	888	0	888	888	888	888	888	888	888	1	888	99	99	99	99	22866.3	1 - Bangkok and Metro	7375247	22833.6
281	2	55	2	1	3	3	2	0	888	888	888	0	888	888	888	888	888	888	888	1	888	88	88	88	88	22866.3	1 - Bangkok and Metro	7375247	22833.6
282	2	60	4	1	3	3	2	0	888	888	888	0	888	888	888	888	888	888	888	1	888	88	88	99	88	22866.3	1 - Bangkok and Metro	7375247	22833.6
283	2	51	2	1	3	4	2	0	888	888	888	0	888	888	888	888	888	888	888	1	888	88	88	88	88	22866.3	1 - Bangkok and Metro	7375247	22833.6
284	2	57	2	1	3	3	2	0	888	888	888	0	888	888	888	888	888	888	888	1	888	99	99	99	99	22866.3	1 - Bangkok and Metro	7375247	22833.6
285	1	50	2	1	5	2	2	1	20	1	4	0	888	888	888	888	888	888	888	3	4	99	99	99	99	23346.2	1 - Bangkok and Metro	7375247	22833.6
286	1	68	4	1	5	2	2	0	888	888	888	0	888	888	888	888	888	888	888	3	1	99	99	99	99	23346.2	1 - Bangkok and Metro	7375247	22833.6
287	1	69	2	1	6	2	2	0	888	888	888	0	888	888	888	888	888	888	888	3	1	88	88	88	88	23346.2	1 - Bangkok and Metro	7375247	22833.6
288	1	53	2	3	3	6	2	0	888	888	888	0	888	888	888	888	888	888	888	3	3	88	88	88	88	23346.2	1 - Bangkok and Metro	7375247	22833.6
289	1	59	2	2	5	3	2	0	888	888	888	0	888	888	888	888	888	888	888	3	2	99	88	88	1	23346.2	1 - Bangkok and Metro	7375247	22833.6
290	1	61	4	1	3	5	2	0	888	888	888	0	888	888	888	888	888	888	888	3	1	88	88	88	88	23346.2	1 - Bangkok and Metro	7375247	22833.6
291	2	21	1	5	10	3	2	0	888	888	888	0	888	888	888	888	888	888	888	1	888	0	0	0	0	22843.1	1 - Bangkok and Metro	7375247	22833.6
292	2	25	1	4	5	3	2	0	888	888	888	0	888	888	888	888	888	888	888	3	4	88	88	88	88	22843.1	1 - Bangkok and Metro	7375247	22833.6
293	2	20	1	3	10	2	2	0	888	888	888	0	888	888	888	888	888	888	888	1	888	88	88	88	1	22843.1	1 - Bangkok and Metro	7375247	22833.6
294	1	22	1	2	2	3	2	1	20	1	1	6	10	0	0	0	0	0	4	2	3	88	88	88	88	23157.3	1 - Bangkok and Metro	7375247	22833.6
295	1	26	3	2	9	3	2	0	888	888	888	0	888	888	888	888	888	888	888	3	4	0	1	1	1	23157.3	1 - Bangkok and Metro	7375247	22833.6
296	1	25	1	6	2	4	2	0	888	888	888	0	888	888	888	888	888	888	888	3	4	88	88	88	88	23157.3	1 - Bangkok and Metro	7375247	22833.6
297	1	33	3	2	2	4	2	0	888	888	888	0	888	888	888	888	888	888	888	3	4	0	0	0	0	23638.7	1 - Bangkok and Metro	7375247	22833.6
298	2	33	1	6	2	5	2	0	888	888	888	0	888	888	888	888	888	888	888	1	888	88	88	88	88	23892.3	1 - Bangkok and Metro	7375247	22833.6
299	2	36	2	2	3	5	2	0	888	888	888	0	888	888	888	888	888	888	888	1	888	88	88	1	2	23892.3	1 - Bangkok and Metro	7375247	22833.6
300	2	31	2	3	2	3	2	0	888	888	888	0	888	888	888	888	888	888	888	1	888	99	99	99	99	23892.3	1 - Bangkok and Metro	7375247	22833.6
301	1	35	2	4	2	4	2	0	888	888	888	0	888	888	888	888	888	888	888	3	3	88	88	88	88	23638.7	1 - Bangkok and Metro	7375247	22833.6
302	1	32	1	6	2	4	2	0	888	888	888	0	888	888	888	888	888	888	888	3	4	88	88	88	88	23638.7	1 - Bangkok and Metro	7375247	22833.6
303	1	38	2	3	5	3	2	0	888	888	888	0	888	888	888	888	888	888	888	3	4	88	88	88	88	23638.7	1 - Bangkok and Metro	7375247	22833.6
304	2	46	2	4	5	4	2	0	888	888	888	0	888	888	888	888	888	888	888	1	888	88	88	88	88	22134.8	1 - Bangkok and Metro	7375247	22833.6
305	2	48	2	2	5	4	2	0	888	888	888	0	888	888	888	888	888	888	888	3	1	88	88	88	88	22134.8	1 - Bangkok and Metro	7375247	22833.6
306	2	41	2	2	5	3	2	0	888	888	888	0	888	888	888	888	888	888	888	1	888	99	99	88	88	22134.8	1 - Bangkok and Metro	7375247	22833.6
307	2	48	2	2	3	5	2	0	888	888	888	0	888	888	888	888	888	888	888	1	888	88	88	88	88	22134.8	1 - Bangkok and Metro	7375247	22833.6
308	1	43	2	2	3	4	2	0	888	888	888	0	888	888	888	888	888	888	888	3	4	88	88	1	1	23745.8	1 - Bangkok and Metro	7375247	22833.6
309	1	46	2	2	5	3	2	0	888	888	888	0	888	888	888	888	888	888	888	3	4	88	88	88	88	23745.8	1 - Bangkok and Metro	7375247	22833.6
310	1	46	2	3	5	4	2	0	888	888	888	0	888	888	888	888	888	888	888	3	1	88	88	88	88	23745.8	1 - Bangkok and Metro	7375247	22833.6
311	2	53	2	1	5	3	2	0	888	888	888	0	888	888	888	888	888	888	888	1	888	88	88	88	88	22866.3	1 - Bangkok and Metro	7375247	22833.6
312	2	56	2	1	3	3	2	0	888	888	888	0	888	888	888	888	888	888	888	1	888	88	88	88	88	22866.3	1 - Bangkok and Metro	7375247	22833.6
313	2	60	2	1	6	2	2	0	888	888	888	0	888	888	888	888	888	888	888	1	888	88	88	88	88	22866.3	1 - Bangkok and Metro	7375247	22833.6
314	2	52	2	1	3	3	2	0	888	888	888	0	888	888	888	888	888	888	888	1	888	88	88	88	88	22866.3	1 - Bangkok and Metro	7375247	22833.6
315	2	57	2	2	3	6	2	0	888	888	888	0	888	888	888	888	888	888	888	1	888	88	88	1	3	22866.3	1 - Bangkok and Metro	7375247	22833.6
316	2	52	2	2	3	6	2	0	888	888	888	0	888	888	888	888	888	888	888	1	888	88	88	88	88	22866.3	1 - Bangkok and Metro	7375247	22833.6
317	2	63	2	1	6	2	2	0	888	888	888	0	888	888	888	888	888	888	888	1	888	99	99	99	99	22866.3	1 - Bangkok and Metro	7375247	22833.6
318	1	51	2	2	3	7	3	0	888	888	888	0	888	888	888	888	888	888	888	3	4	88	1	1	2	23346.2	1 - Bangkok and Metro	7375247	22833.6
319	1	62	2	2	3	6	2	0	888	888	888	0	888	888	888	888	888	888	888	3	2	99	99	99	99	23346.2	1 - Bangkok and Metro	7375247	22833.6
320	1	58	2	1	5	3	2	0	888	888	888	0	888	888	888	888	888	888	888	3	4	88	88	88	88	23346.2	1 - Bangkok and Metro	7375247	22833.6
321	1	60	2	1	5	3	2	0	888	888	888	0	888	888	888	888	888	888	888	1	888	88	99	88	88	23346.2	1 - Bangkok and Metro	7375247	22833.6
322	1	53	2	1	5	3	2	0	888	888	888	0	888	888	888	888	888	888	888	3	1	88	88	88	88	23346.2	1 - Bangkok and Metro	7375247	22833.6
323	1	52	2	1	3	3	2	0	888	888	888	0	888	888	888	888	888	888	888	3	4	88	88	88	88	23346.2	1 - Bangkok and Metro	7375247	22833.6
324	2	20	1	3	3	3	2	0	888	888	888	0	888	888	888	888	888	888	888	1	888	88	88	88	88	22843.1	2 - Central and Eastern	12188254	23260
325	2	20	1	5	10	2	2	0	888	888	888	0	888	888	888	888	888	888	888	1	888	88	88	88	88	22843.1	2 - Central and Eastern	12188254	23260
326	2	25	1	4	2	4	2	0	888	888	888	0	888	888	888	888	888	888	888	1	888	99	99	99	99	22843.1	2 - Central and Eastern	12188254	23260
327	1	23	1	4	2	3	2	0	888	888	888	0	888	888	888	888	888	888	888	1	888	88	88	88	88	23157.3	2 - Central and Eastern	12188254	23260
328	1	21	1	5	10	2	2	0	888	888	888	0	888	888	888	888	888	888	888	1	888	88	88	88	88	23157.3	2 - Central and Eastern	12188254	23260
329	1	20	1	5	10	2	2	0	888	888	888	0	888	888	888	888	888	888	888	1	888	99	99	99	99	23157.3	2 - Central and Eastern	12188254	23260
330	2	27	1	2	9	4	2	0	888	888	888	0	888	888	888	888	888	888	888	1	888	88	88	88	2	22843.1	2 - Central and Eastern	12188254	23260
331	2	37	3	6	2	7	99	0	888	888	888	0	888	888	888	888	888	888	888	1	888	88	88	88	88	23892.3	2 - Central and Eastern	12188254	23260
332	2	20	1	5	10	1	2	0	888	888	888	0	888	888	888	888	888	888	888	1	888	88	88	88	88	22843.1	2 - Central and Eastern	12188254	23260
333	2	33	2	6	4	8	2	0	888	888	888	0	888	888	888	888	888	888	888	1	888	88	88	88	88	23892.3	2 - Central and Eastern	12188254	23260
334	2	36	2	6	2	4	2	0	888	888	888	0	888	888	888	888	888	888	888	1	888	99	99	99	99	23892.3	2 - Central and Eastern	12188254	23260
335	2	32	3	4	9	3	2	0	888	888	888	0	888	888	888	888	888	888	888	1	888	88	88	88	88	23892.3	2 - Central and Eastern	12188254	23260
336	1	32	2	6	2	5	2	0	888	888	888	0	888	888	888	888	888	888	888	3	4	88	88	88	88	23638.7	2 - Central and Eastern	12188254	23260
337	2	39	3	2	3	6	2	0	888	888	888	0	888	888	888	888	888	888	888	1	888	88	88	88	88	23892.3	2 - Central and Eastern	12188254	23260
338	1	31	3	4	2	5	2	0	888	888	888	0	888	888	888	888	888	888	888	3	4	88	88	88	88	23638.7	2 - Central and Eastern	12188254	23260
339	2	42	2	6	4	6	2	0	888	888	888	0	888	888	888	888	888	888	888	3	1	88	1	1	1	22134.8	2 - Central and Eastern	12188254	23260
340	2	44	2	3	3	4	2	0	888	888	888	0	888	888	888	888	888	888	888	1	888	88	88	88	88	22134.8	2 - Central and Eastern	12188254	23260
341	1	44	2	6	2	5	2	0	888	888	888	0	888	888	888	888	888	888	888	3	4	99	99	99	99	23745.8	2 - Central and Eastern	12188254	23260
342	1	47	2	4	2	5	2	0	888	888	888	0	888	888	888	888	888	888	888	1	888	88	88	88	88	23745.8	2 - Central and Eastern	12188254	23260
343	2	46	2	2	4	5	2	0	888	888	888	0	888	888	888	888	888	888	888	1	888	99	99	99	2	22134.8	2 - Central and Eastern	12188254	23260
344	2	44	2	1	3	5	2	0	888	888	888	0	888	888	888	888	888	888	888	1	888	99	99	99	99	22134.8	2 - Central and Eastern	12188254	23260
345	2	48	2	4	2	6	2	0	888	888	888	0	888	888	888	888	888	888	888	1	888	88	88	88	88	22134.8	2 - Central and Eastern	12188254	23260
346	1	45	3	4	3	5	2	0	888	888	888	0	888	888	888	888	888	888	888	3	4	88	88	88	88	23745.8	2 - Central and Eastern	12188254	23260
347	1	42	4	6	4	11	2	0	888	888	888	0	888	888	888	888	888	888	888	3	4	88	88	88	88	23745.8	2 - Central and Eastern	12188254	23260
348	1	55	2	1	5	3	2	0	888	888	888	0	888	888	888	888	888	888	888	3	1	88	88	88	88	23346.2	2 - Central and Eastern	12188254	23260
349	1	47	2	3	2	5	2	0	888	888	888	0	888	888	888	888	888	888	888	2	4	99	99	99	99	23745.8	2 - Central and Eastern	12188254	23260
350	1	59	2	1	5	2	2	0	888	888	888	0	888	888	888	888	888	888	888	3	1	88	88	1	1	23346.2	2 - Central and Eastern	12188254	23260
351	1	53	2	2	9	4	2	0	888	888	888	0	888	888	888	888	888	888	888	1	888	88	88	88	88	23346.2	2 - Central and Eastern	12188254	23260
352	1	59	2	1	3	3	2	0	888	888	888	0	888	888	888	888	888	888	888	1	888	99	99	99	99	23346.2	2 - Central and Eastern	12188254	23260
353	1	66	4	1	3	5	2	0	888	888	888	0	888	888	888	888	888	888	888	3	4	88	88	88	88	23346.2	2 - Central and Eastern	12188254	23260
354	1	52	2	2	3	3	2	0	888	888	888	0	888	888	888	888	888	888	888	3	4	88	88	88	88	23346.2	2 - Central and Eastern	12188254	23260
355	1	50	2	2	5	3	2	0	888	888	888	0	888	888	888	888	888	888	888	3	4	88	88	88	88	23346.2	2 - Central and Eastern	12188254	23260
356	1	51	2	2	2	5	2	0	888	888	888	0	888	888	888	888	888	888	888	1	888	99	99	99	99	23346.2	2 - Central and Eastern	12188254	23260
357	1	50	2	2	9	4	2	0	888	888	888	0	888	888	888	888	888	888	888	2	4	88	88	88	88	23346.2	2 - Central and Eastern	12188254	23260
358	1	54	2	2	5	3	2	0	888	888	888	0	888	888	888	888	888	888	888	3	4	88	88	88	88	23346.2	2 - Central and Eastern	12188254	23260
359	1	39	3	3	2	3	2	0	888	888	888	0	888	888	888	888	888	888	888	3	4	88	88	88	88	23638.7	2 - Central and Eastern	12188254	23260
360	2	56	3	1	6	1	2	0	888	888	888	0	888	888	888	888	888	888	888	1	888	99	99	99	99	22866.3	2 - Central and Eastern	12188254	23260
361	2	54	3	1	6	2	2	0	888	888	888	0	888	888	888	888	888	888	888	1	888	99	99	99	2	22866.3	2 - Central and Eastern	12188254	23260
362	2	59	3	1	6	1	2	0	888	888	888	0	888	888	888	888	888	888	888	1	888	99	99	99	1	22866.3	2 - Central and Eastern	12188254	23260
363	2	57	3	1	6	1	2	0	888	888	888	0	888	888	888	888	888	888	888	1	888	99	99	99	99	22866.3	2 - Central and Eastern	12188254	23260
364	2	52	3	1	3	3	2	0	888	888	888	0	888	888	888	888	888	888	888	2	4	99	99	99	99	22866.3	2 - Central and Eastern	12188254	23260
365	2	64	2	2	6	2	2	0	888	888	888	0	888	888	888	888	888	888	888	1	888	99	99	99	99	22866.3	2 - Central and Eastern	12188254	23260
366	2	51	3	2	3	6	2	0	888	888	888	0	888	888	888	888	888	888	888	1	888	88	88	88	88	22866.3	2 - Central and Eastern	12188254	23260
367	2	60	2	2	3	7	2	0	888	888	888	0	888	888	888	888	888	888	888	1	888	88	88	88	88	22866.3	2 - Central and Eastern	12188254	23260
368	2	55	3	1	3	6	2	0	888	888	888	0	888	888	888	888	888	888	888	1	888	99	99	99	99	22866.3	2 - Central and Eastern	12188254	23260
369	2	53	2	2	3	4	2	0	888	888	888	0	888	888	888	888	888	888	888	1	888	88	88	88	88	22866.3	2 - Central and Eastern	12188254	23260
370	2	58	2	2	6	2	2	0	888	888	888	0	888	888	888	888	888	888	888	1	888	88	88	88	88	22866.3	2 - Central and Eastern	12188254	23260
371	2	56	4	2	5	3	2	0	888	888	888	0	888	888	888	888	888	888	888	1	888	88	88	88	88	22866.3	2 - Central and Eastern	12188254	23260
372	2	55	2	3	3	4	2	0	888	888	888	0	888	888	888	888	888	888	888	1	888	88	88	88	88	22866.3	2 - Central and Eastern	12188254	23260
373	2	58	2	1	3	3	2	0	888	888	888	0	888	888	888	888	888	888	888	1	888	99	99	99	99	22866.3	2 - Central and Eastern	12188254	23260
374	2	54	2	6	2	6	2	0	888	888	888	0	888	888	888	888	888	888	888	1	888	99	99	99	99	22866.3	2 - Central and Eastern	12188254	23260
375	2	59	2	2	3	3	2	0	888	888	888	0	888	888	888	888	888	888	888	1	888	99	99	99	99	22866.3	2 - Central and Eastern	12188254	23260
376	2	64	2	1	3	3	2	0	888	888	888	0	888	888	888	888	888	888	888	1	888	99	99	99	99	22866.3	2 - Central and Eastern	12188254	23260
377	2	65	3	1	5	2	2	0	888	888	888	0	888	888	888	888	888	888	888	1	888	88	1	1	1	22866.3	2 - Central and Eastern	12188254	23260
378	2	54	2	4	9	4	2	0	888	888	888	0	888	888	888	888	888	888	888	1	888	88	88	88	88	22866.3	2 - Central and Eastern	12188254	23260
379	2	58	3	1	3	3	2	0	888	888	888	0	888	888	888	888	888	888	888	1	888	88	88	88	88	22866.3	2 - Central and Eastern	12188254	23260
380	2	60	4	1	3	3	2	0	888	888	888	0	888	888	888	888	888	888	888	1	888	88	88	88	88	22866.3	2 - Central and Eastern	12188254	23260
381	2	50	3	4	2	4	2	0	888	888	888	0	888	888	888	888	888	888	888	1	888	88	88	1	1	22866.3	2 - Central and Eastern	12188254	23260
382	2	51	2	2	3	4	2	0	888	888	888	0	888	888	888	888	888	888	888	1	888	99	99	99	99	22866.3	2 - Central and Eastern	12188254	23260
383	1	55	2	1	6	1	2	0	888	888	888	0	888	888	888	888	888	888	888	1	888	99	99	99	99	23346.2	2 - Central and Eastern	12188254	23260
384	1	57	3	1	3	4	2	0	888	888	888	0	888	888	888	888	888	888	888	1	888	99	99	99	99	23346.2	2 - Central and Eastern	12188254	23260
385	1	58	3	1	7	5	2	0	888	888	888	0	888	888	888	888	888	888	888	1	888	99	99	99	99	23346.2	2 - Central and Eastern	12188254	23260
386	1	57	3	2	5	4	2	0	888	888	888	0	888	888	888	888	888	888	888	3	4	88	88	88	88	23346.2	2 - Central and Eastern	12188254	23260
387	1	50	2	2	3	7	2	1	16	1	1	0	888	888	888	888	888	888	888	3	4	88	88	88	88	23346.2	2 - Central and Eastern	12188254	23260
388	1	52	2	4	4	5	2	1	40	3	6	7	10	0	0	0	0	0	0	3	1	0	1	88	88	23346.2	2 - Central and Eastern	12188254	23260
389	1	50	4	1	5	3	2	1	31	1	4	0	888	888	888	888	888	888	888	3	4	0	0	88	88	23346.2	2 - Central and Eastern	12188254	23260
390	1	45	3	3	2	4	2	1	20	1	2	0	888	888	888	888	888	888	888	3	4	0	0	1	1	23745.8	2 - Central and Eastern	12188254	23260
391	2	40	3	2	3	4	2	1	18	1	2	0	888	888	888	888	888	888	888	3	1	0	0	1	1	22134.8	2 - Central and Eastern	12188254	23260
392	1	39	3	1	3	3	99	1	30	4	5	3	10	9	9	0	0	0	0	3	1	1	88	88	88	23638.7	2 - Central and Eastern	12188254	23260
393	1	34	2	2	2	4	2	1	20	1	1	7	1	1	0	0	0	0	9	3	4	99	99	99	1	23638.7	2 - Central and Eastern	12188254	23260
394	2	34	3	3	3	3	2	1	17	1	4	0	888	888	888	888	888	888	888	3	1	0	0	0	1	23892.3	2 - Central and Eastern	12188254	23260
395	1	27	1	3	9	3	2	1	18	1	1	0	888	888	888	888	888	888	888	3	4	88	88	88	88	23157.3	2 - Central and Eastern	12188254	23260
396	2	29	1	2	3	3	2	1	19	1	2	0	888	888	888	888	888	888	888	3	1	88	88	1	1	22843.1	2 - Central and Eastern	12188254	23260
397	1	21	1	3	9	3	2	1	17	1	4	7	0	0	0	0	0	0	4	1	888	99	88	88	88	23157.3	2 - Central and Eastern	12188254	23260
398	1	26	1	2	2	4	2	1	19	1	4	8	0	9	0	0	0	0	0	3	4	99	99	99	99	23157.3	2 - Central and Eastern	12188254	23260
399	2	58	4	1	6	2	2	0	888	888	888	0	888	888	888	888	888	888	888	1	888	88	88	88	88	22866.3	2 - Central and Eastern	12188254	23260
400	2	62	2	1	6	2	2	0	888	888	888	0	888	888	888	888	888	888	888	1	888	99	99	99	99	22866.3	2 - Central and Eastern	12188254	23260
401	2	67	2	1	6	1	2	0	888	888	888	0	888	888	888	888	888	888	888	1	888	88	88	88	88	22866.3	2 - Central and Eastern	12188254	23260
402	2	70	4	1	6	1	2	0	888	888	888	0	888	888	888	888	888	888	888	3	1	99	99	99	99	22866.3	2 - Central and Eastern	12188254	23260
403	2	63	2	1	3	3	2	0	888	888	888	0	888	888	888	888	888	888	888	1	888	99	99	99	99	22866.3	2 - Central and Eastern	12188254	23260
404	2	55	4	1	3	3	2	0	888	888	888	0	888	888	888	888	888	888	888	1	888	99	99	99	99	22866.3	2 - Central and Eastern	12188254	23260
405	2	65	2	1	3	2	2	0	888	888	888	0	888	888	888	888	888	888	888	1	888	88	88	88	88	22866.3	2 - Central and Eastern	12188254	23260
406	2	62	2	2	5	3	2	0	888	888	888	0	888	888	888	888	888	888	888	1	888	88	88	88	88	22866.3	2 - Central and Eastern	12188254	23260
407	2	61	4	2	3	3	2	0	888	888	888	0	888	888	888	888	888	888	888	1	888	88	88	88	88	22866.3	2 - Central and Eastern	12188254	23260
408	2	60	2	2	6	2	2	0	888	888	888	0	888	888	888	888	888	888	888	1	888	88	88	88	88	22866.3	2 - Central and Eastern	12188254	23260
409	2	58	2	2	5	2	2	0	888	888	888	0	888	888	888	888	888	888	888	1	888	88	88	88	88	22866.3	2 - Central and Eastern	12188254	23260
410	2	56	2	3	4	5	2	0	888	888	888	0	888	888	888	888	888	888	888	1	888	88	88	88	88	22866.3	2 - Central and Eastern	12188254	23260
411	2	54	3	1	6	2	2	0	888	888	888	0	888	888	888	888	888	888	888	1	888	0	0	0	0	22866.3	2 - Central and Eastern	12188254	23260
412	2	55	3	1	3	3	2	0	888	888	888	0	888	888	888	888	888	888	888	1	888	0	0	0	0	22866.3	2 - Central and Eastern	12188254	23260
413	2	57	2	2	6	3	2	0	888	888	888	0	888	888	888	888	888	888	888	1	888	0	0	0	0	22866.3	2 - Central and Eastern	12188254	23260
414	2	60	2	2	3	3	2	0	888	888	888	0	888	888	888	888	888	888	888	1	888	0	0	0	0	22866.3	2 - Central and Eastern	12188254	23260
415	2	63	3	1	6	3	2	0	888	888	888	0	888	888	888	888	888	888	888	1	888	0	0	0	0	22866.3	2 - Central and Eastern	12188254	23260
416	2	65	2	2	3	3	2	0	888	888	888	0	888	888	888	888	888	888	888	1	888	0	0	0	0	22866.3	2 - Central and Eastern	12188254	23260
417	2	53	3	6	1	6	2	0	888	888	888	0	888	888	888	888	888	888	888	1	888	88	88	88	88	22866.3	2 - Central and Eastern	12188254	23260
418	2	65	2	1	3	3	2	0	888	888	888	0	888	888	888	888	888	888	888	1	888	88	88	1	1	22866.3	2 - Central and Eastern	12188254	23260
419	2	55	4	1	3	5	2	0	888	888	888	0	888	888	888	888	888	888	888	1	888	88	88	99	99	22866.3	2 - Central and Eastern	12188254	23260
420	2	63	3	2	3	6	2	0	888	888	888	0	888	888	888	888	888	888	888	1	888	99	99	99	99	22866.3	2 - Central and Eastern	12188254	23260
421	2	52	2	6	2	7	2	0	888	888	888	0	888	888	888	888	888	888	888	1	888	88	88	88	88	22866.3	2 - Central and Eastern	12188254	23260
422	2	65	2	2	3	4	2	0	888	888	888	0	888	888	888	888	888	888	888	1	888	88	88	88	88	22866.3	2 - Central and Eastern	12188254	23260
423	2	50	2	2	5	3	2	0	888	888	888	0	888	888	888	888	888	888	888	1	888	88	88	88	88	22866.3	2 - Central and Eastern	12188254	23260
424	2	59	4	2	5	3	2	0	888	888	888	0	888	888	888	888	888	888	888	1	888	0	0	1	88	22866.3	2 - Central and Eastern	12188254	23260
425	2	66	2	2	3	6	2	0	888	888	888	0	888	888	888	888	888	888	888	1	888	88	88	88	88	22866.3	2 - Central and Eastern	12188254	23260
426	2	63	2	2	3	6	2	0	888	888	888	0	888	888	888	888	888	888	888	1	888	88	88	88	88	22866.3	2 - Central and Eastern	12188254	23260
427	2	61	2	1	3	2	2	0	888	888	888	0	888	888	888	888	888	888	888	1	888	88	1	88	88	22866.3	2 - Central and Eastern	12188254	23260
428	2	20	1	5	10	2	2	0	888	888	888	0	888	888	888	888	888	888	888	1	888	88	88	1	1	22843.1	2 - Central and Eastern	12188254	23260
429	2	29	3	2	5	3	2	0	888	888	888	0	888	888	888	888	888	888	888	1	888	88	88	88	88	22843.1	2 - Central and Eastern	12188254	23260
430	2	23	1	3	2	4	2	0	888	888	888	0	888	888	888	888	888	888	888	3	4	1	2	88	88	22843.1	2 - Central and Eastern	12188254	23260
431	2	21	1	3	2	4	2	0	888	888	888	0	888	888	888	888	888	888	888	1	888	88	88	88	88	22843.1	2 - Central and Eastern	12188254	23260
432	2	20	1	5	10	2	2	0	888	888	888	0	888	888	888	888	888	888	888	1	888	88	88	88	88	22843.1	2 - Central and Eastern	12188254	23260
433	2	24	1	6	2	4	2	0	888	888	888	0	888	888	888	888	888	888	888	1	888	88	88	88	88	22843.1	2 - Central and Eastern	12188254	23260
434	2	28	3	6	3	5	2	0	888	888	888	0	888	888	888	888	888	888	888	1	888	88	88	88	88	22843.1	2 - Central and Eastern	12188254	23260
435	2	26	3	2	2	3	2	0	888	888	888	0	888	888	888	888	888	888	888	1	888	88	88	99	99	22843.1	2 - Central and Eastern	12188254	23260
436	2	26	1	6	2	4	2	0	888	888	888	0	888	888	888	888	888	888	888	1	888	88	88	88	88	22843.1	2 - Central and Eastern	12188254	23260
437	2	30	2	4	2	3	2	0	888	888	888	0	888	888	888	888	888	888	888	1	888	0	0	0	0	23892.3	2 - Central and Eastern	12188254	23260
438	2	33	3	2	2	3	2	0	888	888	888	0	888	888	888	888	888	888	888	1	888	0	0	0	0	23892.3	2 - Central and Eastern	12188254	23260
439	2	38	1	2	2	3	2	0	888	888	888	0	888	888	888	888	888	888	888	1	888	0	0	0	0	23892.3	2 - Central and Eastern	12188254	23260
440	2	32	3	6	4	9	2	0	888	888	888	0	888	888	888	888	888	888	888	1	888	88	88	88	88	23892.3	2 - Central and Eastern	12188254	23260
441	2	36	2	6	2	5	2	0	888	888	888	0	888	888	888	888	888	888	888	1	888	88	88	88	88	23892.3	2 - Central and Eastern	12188254	23260
442	2	32	3	3	5	4	2	0	888	888	888	0	888	888	888	888	888	888	888	1	888	88	88	88	88	23892.3	2 - Central and Eastern	12188254	23260
443	2	34	3	1	3	4	2	0	888	888	888	0	888	888	888	888	888	888	888	1	888	99	99	99	99	23892.3	2 - Central and Eastern	12188254	23260
444	2	37	2	6	4	5	2	0	888	888	888	0	888	888	888	888	888	888	888	1	888	99	99	99	99	23892.3	2 - Central and Eastern	12188254	23260
445	2	37	2	4	2	3	2	0	888	888	888	0	888	888	888	888	888	888	888	1	888	88	88	88	88	23892.3	2 - Central and Eastern	12188254	23260
446	2	30	3	6	9	5	2	0	888	888	888	0	888	888	888	888	888	888	888	1	888	88	88	88	88	23892.3	2 - Central and Eastern	12188254	23260
447	2	30	1	3	2	5	2	0	888	888	888	0	888	888	888	888	888	888	888	1	888	88	88	88	88	23892.3	2 - Central and Eastern	12188254	23260
448	2	38	1	2	2	3	2	0	888	888	888	0	888	888	888	888	888	888	888	1	888	88	88	88	88	23892.3	2 - Central and Eastern	12188254	23260
449	2	30	2	2	5	4	2	0	888	888	888	0	888	888	888	888	888	888	888	1	888	1	88	88	88	23892.3	2 - Central and Eastern	12188254	23260
450	2	22	1	4	9	5	2	0	888	888	888	0	888	888	888	888	888	888	888	1	888	0	0	0	0	22843.1	2 - Central and Eastern	12188254	23260
451	2	26	3	6	2	5	2	0	888	888	888	0	888	888	888	888	888	888	888	1	888	0	0	0	0	22843.1	2 - Central and Eastern	12188254	23260
452	2	50	2	1	3	3	2	0	888	888	888	0	888	888	888	888	888	888	888	1	888	0	0	0	0	22866.3	2 - Central and Eastern	12188254	23260
453	2	52	3	2	5	4	2	0	888	888	888	0	888	888	888	888	888	888	888	1	888	88	88	88	88	22866.3	2 - Central and Eastern	12188254	23260
454	2	58	3	1	3	3	2	0	888	888	888	0	888	888	888	888	888	888	888	1	888	88	88	88	88	22866.3	2 - Central and Eastern	12188254	23260
455	2	52	2	3	3	7	2	0	888	888	888	0	888	888	888	888	888	888	888	1	888	99	99	99	99	22866.3	2 - Central and Eastern	12188254	23260
456	2	67	2	1	6	2	2	0	888	888	888	0	888	888	888	888	888	888	888	1	888	88	88	88	88	22866.3	2 - Central and Eastern	12188254	23260
457	2	42	2	3	9	4	2	0	888	888	888	0	888	888	888	888	888	888	888	1	888	0	0	0	0	22134.8	2 - Central and Eastern	12188254	23260
458	2	45	2	2	2	3	2	0	888	888	888	0	888	888	888	888	888	888	888	1	888	0	0	0	0	22134.8	2 - Central and Eastern	12188254	23260
459	2	49	2	4	2	4	2	0	888	888	888	0	888	888	888	888	888	888	888	1	888	0	0	0	0	22134.8	2 - Central and Eastern	12188254	23260
460	2	44	2	6	1	5	2	0	888	888	888	0	888	888	888	888	888	888	888	1	888	88	88	88	88	22134.8	2 - Central and Eastern	12188254	23260
461	2	46	3	3	4	7	2	0	888	888	888	0	888	888	888	888	888	888	888	1	888	88	88	88	88	22134.8	2 - Central and Eastern	12188254	23260
462	2	49	2	4	2	5	2	0	888	888	888	0	888	888	888	888	888	888	888	1	888	88	88	88	88	22134.8	2 - Central and Eastern	12188254	23260
463	2	41	3	2	2	4	2	0	888	888	888	0	888	888	888	888	888	888	888	1	888	99	99	99	99	22134.8	2 - Central and Eastern	12188254	23260
464	2	47	4	1	3	4	2	0	888	888	888	0	888	888	888	888	888	888	888	1	888	88	88	88	88	22134.8	2 - Central and Eastern	12188254	23260
465	2	49	4	3	4	5	2	0	888	888	888	0	888	888	888	888	888	888	888	1	888	99	99	99	99	22134.8	2 - Central and Eastern	12188254	23260
466	2	46	3	2	5	3	2	0	888	888	888	0	888	888	888	888	888	888	888	1	888	1	2	2	88	22134.8	2 - Central and Eastern	12188254	23260
467	2	49	3	2	3	6	2	0	888	888	888	0	888	888	888	888	888	888	888	1	888	1	1	1	2	22134.8	2 - Central and Eastern	12188254	23260
468	2	41	2	6	1	5	2	0	888	888	888	0	888	888	888	888	888	888	888	1	888	99	99	99	99	22134.8	2 - Central and Eastern	12188254	23260
469	2	49	2	2	5	3	2	0	888	888	888	0	888	888	888	888	888	888	888	1	888	88	88	88	88	22134.8	2 - Central and Eastern	12188254	23260
470	2	43	1	2	2	4	2	0	888	888	888	0	888	888	888	888	888	888	888	1	888	88	88	88	88	22134.8	2 - Central and Eastern	12188254	23260
471	2	46	1	4	2	4	2	0	888	888	888	0	888	888	888	888	888	888	888	1	888	88	88	88	88	22134.8	2 - Central and Eastern	12188254	23260
472	1	51	2	2	3	3	2	0	888	888	888	0	888	888	888	888	888	888	888	3	4	88	88	88	88	23346.2	2 - Central and Eastern	12188254	23260
473	1	50	1	2	3	3	2	0	888	888	888	0	888	888	888	888	888	888	888	3	4	1	1	88	88	23346.2	2 - Central and Eastern	12188254	23260
474	1	51	4	1	5	3	2	0	888	888	888	0	888	888	888	888	888	888	888	3	4	88	88	88	88	23346.2	2 - Central and Eastern	12188254	23260
475	1	60	2	1	3	3	2	0	888	888	888	0	888	888	888	888	888	888	888	3	4	2	2	88	88	23346.2	2 - Central and Eastern	12188254	23260
476	1	50	4	2	6	4	2	0	888	888	888	0	888	888	888	888	888	888	888	3	4	88	88	88	88	23346.2	2 - Central and Eastern	12188254	23260
477	1	52	2	2	3	3	2	0	888	888	888	0	888	888	888	888	888	888	888	3	4	1	88	88	88	23346.2	2 - Central and Eastern	12188254	23260
478	1	53	2	4	3	6	2	0	888	888	888	0	888	888	888	888	888	888	888	3	4	88	88	88	88	23346.2	2 - Central and Eastern	12188254	23260
479	1	52	3	2	3	5	2	0	888	888	888	0	888	888	888	888	888	888	888	3	4	88	88	88	88	23346.2	2 - Central and Eastern	12188254	23260
480	1	61	2	6	6	3	2	0	888	888	888	0	888	888	888	888	888	888	888	3	1	88	88	88	88	23346.2	2 - Central and Eastern	12188254	23260
481	1	56	1	1	5	3	2	0	888	888	888	0	888	888	888	888	888	888	888	3	4	99	99	99	99	23346.2	2 - Central and Eastern	12188254	23260
482	1	68	2	2	6	2	2	0	888	888	888	0	888	888	888	888	888	888	888	3	1	88	88	88	88	23346.2	2 - Central and Eastern	12188254	23260
483	1	61	2	1	5	3	2	0	888	888	888	0	888	888	888	888	888	888	888	3	1	88	88	1	1	23346.2	2 - Central and Eastern	12188254	23260
484	1	64	2	2	6	2	2	0	888	888	888	0	888	888	888	888	888	888	888	3	1	99	99	99	99	23346.2	2 - Central and Eastern	12188254	23260
485	1	58	2	2	3	4	2	0	888	888	888	0	888	888	888	888	888	888	888	3	4	88	88	88	88	23346.2	2 - Central and Eastern	12188254	23260
486	1	54	3	2	5	3	2	0	888	888	888	0	888	888	888	888	888	888	888	3	4	88	88	88	88	23346.2	2 - Central and Eastern	12188254	23260
487	1	51	3	3	2	6	2	0	888	888	888	0	888	888	888	888	888	888	888	3	4	88	88	88	88	23346.2	2 - Central and Eastern	12188254	23260
488	1	61	3	2	3	3	2	0	888	888	888	0	888	888	888	888	888	888	888	1	888	0	0	0	0	23346.2	2 - Central and Eastern	12188254	23260
489	1	57	3	2	3	3	2	0	888	888	888	0	888	888	888	888	888	888	888	2	1	0	0	0	0	23346.2	2 - Central and Eastern	12188254	23260
490	1	53	3	1	3	2	99	0	888	888	888	0	888	888	888	888	888	888	888	3	1	0	0	0	0	23346.2	2 - Central and Eastern	12188254	23260
491	1	51	2	3	3	3	2	0	888	888	888	0	888	888	888	888	888	888	888	3	4	0	0	0	0	23346.2	2 - Central and Eastern	12188254	23260
492	1	26	3	3	3	4	2	0	888	888	888	0	888	888	888	888	888	888	888	3	4	88	88	88	88	23157.3	2 - Central and Eastern	12188254	23260
493	1	21	1	5	10	2	2	0	888	888	888	0	888	888	888	888	888	888	888	3	4	88	88	88	88	23157.3	2 - Central and Eastern	12188254	23260
494	1	25	1	4	3	4	2	0	888	888	888	0	888	888	888	888	888	888	888	3	4	88	88	88	88	23157.3	2 - Central and Eastern	12188254	23260
495	1	25	1	3	2	3	2	0	888	888	888	0	888	888	888	888	888	888	888	3	4	99	88	88	88	23157.3	2 - Central and Eastern	12188254	23260
496	1	22	1	5	10	2	2	0	888	888	888	0	888	888	888	888	888	888	888	1	888	88	88	88	88	23157.3	2 - Central and Eastern	12188254	23260
497	1	26	1	4	2	3	2	0	888	888	888	0	888	888	888	888	888	888	888	3	4	2	88	88	88	23157.3	2 - Central and Eastern	12188254	23260
498	1	20	1	3	5	5	2	0	888	888	888	0	888	888	888	888	888	888	888	3	4	88	88	88	88	23157.3	2 - Central and Eastern	12188254	23260
499	1	45	2	4	4	8	2	0	888	888	888	0	888	888	888	888	888	888	888	3	4	88	88	88	88	23745.8	2 - Central and Eastern	12188254	23260
500	1	41	2	4	2	4	2	0	888	888	888	0	888	888	888	888	888	888	888	3	4	2	2	88	88	23745.8	2 - Central and Eastern	12188254	23260
501	1	45	2	2	3	6	2	0	888	888	888	0	888	888	888	888	888	888	888	3	4	1	1	88	88	23745.8	2 - Central and Eastern	12188254	23260
502	1	31	2	3	5	3	2	0	888	888	888	0	888	888	888	888	888	888	888	1	888	0	0	0	0	23638.7	2 - Central and Eastern	12188254	23260
503	1	35	2	2	2	3	2	0	888	888	888	0	888	888	888	888	888	888	888	3	4	0	0	0	0	23638.7	2 - Central and Eastern	12188254	23260
504	1	38	2	4	2	4	2	0	888	888	888	0	888	888	888	888	888	888	888	1	888	0	0	0	0	23638.7	2 - Central and Eastern	12188254	23260
505	1	38	2	6	4	6	2	0	888	888	888	0	888	888	888	888	888	888	888	3	4	88	88	88	88	23638.7	2 - Central and Eastern	12188254	23260
506	1	36	3	1	5	3	2	0	888	888	888	0	888	888	888	888	888	888	888	3	4	88	88	88	88	23638.7	2 - Central and Eastern	12188254	23260
507	1	32	3	2	2	3	2	0	888	888	888	0	888	888	888	888	888	888	888	3	4	88	88	88	88	23638.7	2 - Central and Eastern	12188254	23260
508	1	34	2	4	3	5	2	0	888	888	888	0	888	888	888	888	888	888	888	3	4	88	88	88	88	23638.7	2 - Central and Eastern	12188254	23260
509	1	42	2	3	2	3	2	0	888	888	888	0	888	888	888	888	888	888	888	3	4	0	0	0	0	23745.8	2 - Central and Eastern	12188254	23260
510	1	47	2	1	3	3	2	0	888	888	888	0	888	888	888	888	888	888	888	1	888	0	0	0	0	23745.8	2 - Central and Eastern	12188254	23260
511	1	41	4	4	2	5	2	0	888	888	888	0	888	888	888	888	888	888	888	3	4	88	88	88	88	23745.8	2 - Central and Eastern	12188254	23260
512	1	47	2	6	4	9	2	0	888	888	888	0	888	888	888	888	888	888	888	3	4	88	88	88	88	23745.8	2 - Central and Eastern	12188254	23260
513	1	42	4	1	5	4	2	0	888	888	888	0	888	888	888	888	888	888	888	3	4	99	99	99	99	23745.8	2 - Central and Eastern	12188254	23260
514	1	46	2	3	3	5	2	0	888	888	888	0	888	888	888	888	888	888	888	3	3	99	99	99	99	23745.8	2 - Central and Eastern	12188254	23260
515	1	42	2	4	2	4	2	0	888	888	888	0	888	888	888	888	888	888	888	1	888	1	1	1	2	23745.8	2 - Central and Eastern	12188254	23260
516	1	49	3	2	3	4	2	0	888	888	888	0	888	888	888	888	888	888	888	3	4	99	99	1	2	23745.8	2 - Central and Eastern	12188254	23260
517	1	44	2	6	2	6	2	0	888	888	888	0	888	888	888	888	888	888	888	1	888	99	99	99	99	23745.8	2 - Central and Eastern	12188254	23260
518	1	67	2	1	3	5	2	0	888	888	888	0	888	888	888	888	888	888	888	3	4	88	88	88	88	23346.2	2 - Central and Eastern	12188254	23260
519	1	57	3	2	5	4	2	1	21	1	1	0	888	888	888	888	888	888	888	3	4	99	99	99	99	23346.2	2 - Central and Eastern	12188254	23260
520	1	58	2	2	6	2	2	1	888	1	99	0	888	888	888	888	888	888	888	3	1	88	88	88	88	23346.2	2 - Central and Eastern	12188254	23260
521	1	60	2	1	5	2	2	1	29	5	5	0	888	888	888	888	888	888	888	3	4	88	88	88	88	23346.2	2 - Central and Eastern	12188254	23260
522	1	55	2	1	6	3	2	1	22	1	4	0	888	888	888	888	888	888	888	1	888	0	0	0	0	23346.2	2 - Central and Eastern	12188254	23260
523	1	27	3	4	2	4	2	1	888	1	4	0	888	888	888	888	888	888	888	3	4	0	0	0	0	23157.3	2 - Central and Eastern	12188254	23260
524	1	22	1	3	2	3	2	1	15	1	2	0	888	888	888	888	888	888	888	3	4	0	0	0	0	23157.3	2 - Central and Eastern	12188254	23260
525	1	27	1	2	9	4	2	1	24	1	4	7	2	4	0	0	0	3	0	3	4	88	88	88	88	23157.3	2 - Central and Eastern	12188254	23260
526	1	21	1	1	5	2	2	99	888	888	888	0	888	888	888	888	888	888	888	3	4	88	88	1	1	23157.3	2 - Central and Eastern	12188254	23260
527	1	29	1	2	5	4	2	1	20	1	1	8	10	0	0	0	0	0	0	3	4	1	1	88	88	23157.3	2 - Central and Eastern	12188254	23260
528	1	33	2	4	9	5	2	1	22	1	4	0	888	888	888	888	888	888	888	3	4	88	88	88	88	23638.7	2 - Central and Eastern	12188254	23260
529	1	30	3	2	5	3	2	1	21	1	2	0	888	888	888	888	888	888	888	3	4	99	99	99	99	23638.7	2 - Central and Eastern	12188254	23260
530	1	39	3	1	5	3	2	1	888	1	2	0	888	888	888	888	888	888	888	3	4	88	88	88	88	23638.7	2 - Central and Eastern	12188254	23260
531	1	33	3	2	9	4	2	1	18	1	4	0	888	888	888	888	888	888	888	3	4	99	99	99	99	23638.7	2 - Central and Eastern	12188254	23260
532	1	34	2	2	3	5	2	1	34	1	1	9	9	9	9	9	9	9	2	3	4	2	88	88	88	23638.7	2 - Central and Eastern	12188254	23260
533	1	45	4	3	9	5	2	1	23	1	4	0	888	888	888	888	888	888	888	3	4	88	88	88	88	23745.8	2 - Central and Eastern	12188254	23260
534	2	23	3	2	5	3	2	1	18	1	99	0	888	888	888	888	888	888	888	1	888	88	88	1	1	22843.1	2 - Central and Eastern	12188254	23260
535	2	32	1	2	2	4	2	0	888	888	888	0	888	888	888	888	888	888	888	2	4	99	99	99	99	23892.3	2 - Central and Eastern	12188254	23260
536	2	62	4	1	3	3	2	0	888	888	888	0	888	888	888	888	888	888	888	1	888	99	99	99	99	22866.3	2 - Central and Eastern	12188254	23260
537	2	57	2	2	3	3	2	0	888	888	888	0	888	888	888	888	888	888	888	1	888	99	99	99	99	22866.3	2 - Central and Eastern	12188254	23260
538	2	65	2	1	11	1	2	0	888	888	888	0	888	888	888	888	888	888	888	1	888	99	99	99	99	22866.3	2 - Central and Eastern	12188254	23260
539	2	52	2	2	3	3	2	0	888	888	888	0	888	888	888	888	888	888	888	1	888	88	88	88	88	22866.3	2 - Central and Eastern	12188254	23260
540	2	50	2	3	5	4	2	0	888	888	888	0	888	888	888	888	888	888	888	1	888	88	88	88	88	22866.3	2 - Central and Eastern	12188254	23260
541	2	58	2	2	3	3	2	0	888	888	888	0	888	888	888	888	888	888	888	1	888	88	88	88	88	22866.3	2 - Central and Eastern	12188254	23260
542	2	63	2	1	6	2	2	0	888	888	888	0	888	888	888	888	888	888	888	1	888	88	88	88	88	22866.3	2 - Central and Eastern	12188254	23260
543	2	55	2	1	6	1	2	0	888	888	888	0	888	888	888	888	888	888	888	1	888	99	99	99	99	22866.3	2 - Central and Eastern	12188254	23260
544	2	50	3	1	6	1	2	0	888	888	888	0	888	888	888	888	888	888	888	1	888	99	99	99	99	22866.3	2 - Central and Eastern	12188254	23260
545	2	53	3	1	6	1	2	0	888	888	888	0	888	888	888	888	888	888	888	1	888	99	99	99	99	22866.3	2 - Central and Eastern	12188254	23260
546	2	57	4	1	6	1	2	0	888	888	888	0	888	888	888	888	888	888	888	1	888	99	99	99	99	22866.3	2 - Central and Eastern	12188254	23260
547	2	50	3	1	5	4	2	0	888	888	888	0	888	888	888	888	888	888	888	1	888	99	99	99	99	22866.3	2 - Central and Eastern	12188254	23260
548	2	51	2	3	3	6	2	0	888	888	888	0	888	888	888	888	888	888	888	1	888	88	88	88	88	22866.3	2 - Central and Eastern	12188254	23260
549	2	56	3	1	3	6	2	0	888	888	888	0	888	888	888	888	888	888	888	1	888	88	88	88	88	22866.3	2 - Central and Eastern	12188254	23260
550	2	64	2	2	6	2	2	0	888	888	888	0	888	888	888	888	888	888	888	1	888	99	99	99	99	22866.3	2 - Central and Eastern	12188254	23260
551	2	50	2	2	2	4	2	0	888	888	888	0	888	888	888	888	888	888	888	1	888	99	99	99	99	22866.3	2 - Central and Eastern	12188254	23260
552	2	58	2	2	3	3	2	0	888	888	888	0	888	888	888	888	888	888	888	1	888	88	88	88	88	22866.3	2 - Central and Eastern	12188254	23260
553	2	60	2	2	3	3	2	0	888	888	888	0	888	888	888	888	888	888	888	1	888	99	99	99	99	22866.3	2 - Central and Eastern	12188254	23260
554	2	59	2	2	3	4	2	0	888	888	888	0	888	888	888	888	888	888	888	1	888	88	88	88	88	22866.3	2 - Central and Eastern	12188254	23260
555	2	47	2	2	3	3	2	0	888	888	888	0	888	888	888	888	888	888	888	1	888	99	99	99	99	22134.8	2 - Central and Eastern	12188254	23260
556	2	48	2	2	3	3	2	0	888	888	888	0	888	888	888	888	888	888	888	1	888	99	99	99	99	22134.8	2 - Central and Eastern	12188254	23260
557	2	48	3	2	5	4	2	0	888	888	888	0	888	888	888	888	888	888	888	1	888	99	99	99	99	22134.8	2 - Central and Eastern	12188254	23260
558	2	44	4	3	5	3	2	0	888	888	888	0	888	888	888	888	888	888	888	1	888	88	88	88	88	22134.8	2 - Central and Eastern	12188254	23260
559	2	42	2	3	3	4	2	0	888	888	888	0	888	888	888	888	888	888	888	1	888	88	88	88	88	22134.8	2 - Central and Eastern	12188254	23260
560	2	45	2	1	3	3	2	0	888	888	888	0	888	888	888	888	888	888	888	1	888	99	99	99	99	22134.8	2 - Central and Eastern	12188254	23260
561	2	40	2	1	3	4	2	0	888	888	888	0	888	888	888	888	888	888	888	1	888	99	99	99	99	22134.8	2 - Central and Eastern	12188254	23260
562	2	44	1	1	5	2	2	0	888	888	888	0	888	888	888	888	888	888	888	1	888	99	99	99	99	22134.8	2 - Central and Eastern	12188254	23260
563	2	45	3	2	3	7	2	0	888	888	888	0	888	888	888	888	888	888	888	1	888	88	88	1	1	22134.8	2 - Central and Eastern	12188254	23260
564	2	43	2	6	4	11	2	0	888	888	888	0	888	888	888	888	888	888	888	1	888	88	88	88	88	22134.8	2 - Central and Eastern	12188254	23260
565	2	44	2	6	2	5	2	0	888	888	888	0	888	888	888	888	888	888	888	1	888	88	88	88	88	22134.8	2 - Central and Eastern	12188254	23260
566	2	43	2	6	2	5	2	0	888	888	888	0	888	888	888	888	888	888	888	1	888	88	88	99	99	22134.8	2 - Central and Eastern	12188254	23260
567	2	30	1	6	2	5	2	0	888	888	888	0	888	888	888	888	888	888	888	1	888	88	88	88	88	23892.3	2 - Central and Eastern	12188254	23260
568	2	32	1	4	2	5	2	0	888	888	888	0	888	888	888	888	888	888	888	1	888	88	88	88	88	23892.3	2 - Central and Eastern	12188254	23260
569	2	35	2	2	3	4	2	0	888	888	888	0	888	888	888	888	888	888	888	1	888	88	88	88	88	23892.3	2 - Central and Eastern	12188254	23260
570	2	32	3	4	2	3	2	0	888	888	888	0	888	888	888	888	888	888	888	1	888	88	88	88	88	23892.3	2 - Central and Eastern	12188254	23260
571	2	37	2	6	4	11	2	0	888	888	888	0	888	888	888	888	888	888	888	1	888	99	99	99	99	23892.3	2 - Central and Eastern	12188254	23260
572	2	38	2	1	2	5	2	0	888	888	888	0	888	888	888	888	888	888	888	1	888	99	99	99	99	23892.3	2 - Central and Eastern	12188254	23260
573	2	33	1	1	3	4	2	0	888	888	888	0	888	888	888	888	888	888	888	1	888	99	99	99	99	23892.3	2 - Central and Eastern	12188254	23260
574	2	36	4	6	4	9	2	0	888	888	888	0	888	888	888	888	888	888	888	1	888	88	88	88	88	23892.3	2 - Central and Eastern	12188254	23260
575	2	34	2	4	3	5	2	0	888	888	888	0	888	888	888	888	888	888	888	1	888	88	88	88	88	23892.3	2 - Central and Eastern	12188254	23260
576	2	30	3	6	2	6	2	0	888	888	888	0	888	888	888	888	888	888	888	1	888	88	88	88	88	23892.3	2 - Central and Eastern	12188254	23260
577	2	34	1	4	2	4	2	0	888	888	888	0	888	888	888	888	888	888	888	1	888	88	88	88	88	23892.3	2 - Central and Eastern	12188254	23260
578	2	38	2	6	2	4	2	0	888	888	888	0	888	888	888	888	888	888	888	1	888	88	88	88	88	23892.3	2 - Central and Eastern	12188254	23260
579	2	25	1	4	3	4	2	0	888	888	888	0	888	888	888	888	888	888	888	1	888	88	88	88	88	22843.1	2 - Central and Eastern	12188254	23260
580	2	22	1	4	2	4	2	0	888	888	888	0	888	888	888	888	888	888	888	1	888	88	88	88	88	22843.1	2 - Central and Eastern	12188254	23260
581	2	23	1	6	9	4	2	0	888	888	888	0	888	888	888	888	888	888	888	1	888	88	88	88	88	22843.1	2 - Central and Eastern	12188254	23260
582	2	29	1	2	2	4	2	0	888	888	888	0	888	888	888	888	888	888	888	1	888	99	99	99	99	22843.1	2 - Central and Eastern	12188254	23260
583	2	27	1	2	8	5	2	0	888	888	888	0	888	888	888	888	888	888	888	1	888	99	99	99	99	22843.1	2 - Central and Eastern	12188254	23260
584	2	26	1	6	2	4	2	0	888	888	888	0	888	888	888	888	888	888	888	1	888	99	99	99	99	22843.1	2 - Central and Eastern	12188254	23260
585	2	25	1	6	2	5	2	0	888	888	888	0	888	888	888	888	888	888	888	1	888	88	88	88	88	22843.1	2 - Central and Eastern	12188254	23260
586	2	28	1	2	3	3	2	0	888	888	888	0	888	888	888	888	888	888	888	1	888	99	99	99	99	22843.1	2 - Central and Eastern	12188254	23260
587	1	60	2	2	3	5	2	0	888	888	888	0	888	888	888	888	888	888	888	3	4	88	88	99	99	23346.2	2 - Central and Eastern	12188254	23260
588	1	65	4	1	3	6	2	0	888	888	888	0	888	888	888	888	888	888	888	3	4	88	88	88	88	23346.2	2 - Central and Eastern	12188254	23260
589	1	59	3	1	5	3	2	0	888	888	888	0	888	888	888	888	888	888	888	3	4	99	99	99	99	23346.2	2 - Central and Eastern	12188254	23260
590	1	57	2	2	9	3	2	0	888	888	888	0	888	888	888	888	888	888	888	1	888	88	88	88	88	23346.2	2 - Central and Eastern	12188254	23260
591	1	67	2	2	3	3	2	0	888	888	888	0	888	888	888	888	888	888	888	1	888	88	88	88	88	23346.2	2 - Central and Eastern	12188254	23260
592	1	59	2	2	3	3	2	0	888	888	888	0	888	888	888	888	888	888	888	2	4	88	88	88	88	23346.2	2 - Central and Eastern	12188254	23260
593	1	52	2	1	6	1	2	0	888	888	888	0	888	888	888	888	888	888	888	1	888	99	99	99	99	23346.2	2 - Central and Eastern	12188254	23260
594	1	57	3	1	6	1	2	0	888	888	888	0	888	888	888	888	888	888	888	1	888	99	99	99	99	23346.2	2 - Central and Eastern	12188254	23260
595	1	50	2	1	6	1	99	0	888	888	888	0	888	888	888	888	888	888	888	1	888	99	99	99	99	23346.2	2 - Central and Eastern	12188254	23260
596	1	58	2	2	3	3	2	0	888	888	888	0	888	888	888	888	888	888	888	3	4	88	88	88	88	23346.2	2 - Central and Eastern	12188254	23260
597	1	60	2	2	5	3	2	0	888	888	888	0	888	888	888	888	888	888	888	3	4	88	88	88	88	23346.2	2 - Central and Eastern	12188254	23260
598	1	53	4	2	5	4	2	0	888	888	888	0	888	888	888	888	888	888	888	3	4	88	88	88	88	23346.2	2 - Central and Eastern	12188254	23260
599	1	56	2	6	1	8	2	0	888	888	888	0	888	888	888	888	888	888	888	1	888	99	99	99	99	23346.2	2 - Central and Eastern	12188254	23260
600	1	50	1	2	5	3	2	0	888	888	888	0	888	888	888	888	888	888	888	3	4	99	99	99	99	23346.2	2 - Central and Eastern	12188254	23260
601	1	56	2	2	5	3	2	0	888	888	888	0	888	888	888	888	888	888	888	3	4	99	99	99	99	23346.2	2 - Central and Eastern	12188254	23260
602	1	38	2	2	3	7	2	0	888	888	888	0	888	888	888	888	888	888	888	3	4	88	88	88	88	23638.7	2 - Central and Eastern	12188254	23260
603	1	37	2	3	3	5	2	0	888	888	888	0	888	888	888	888	888	888	888	3	4	88	88	88	88	23638.7	2 - Central and Eastern	12188254	23260
604	1	36	2	1	3	4	2	0	888	888	888	0	888	888	888	888	888	888	888	1	888	99	99	99	99	23638.7	2 - Central and Eastern	12188254	23260
605	1	30	1	2	2	6	2	99	888	888	888	0	888	888	888	888	888	888	888	3	4	99	99	99	99	23638.7	2 - Central and Eastern	12188254	23260
606	1	31	3	2	2	3	2	0	888	888	888	0	888	888	888	888	888	888	888	3	4	99	99	99	99	23638.7	2 - Central and Eastern	12188254	23260
607	1	34	3	3	9	4	2	0	888	888	888	0	888	888	888	888	888	888	888	3	4	99	99	1	2	23638.7	2 - Central and Eastern	12188254	23260
608	1	49	2	6	3	11	2	0	888	888	888	0	888	888	888	888	888	888	888	1	888	99	99	99	99	23745.8	2 - Central and Eastern	12188254	23260
609	1	42	3	1	5	3	2	0	888	888	888	0	888	888	888	888	888	888	888	3	4	99	99	99	99	23745.8	2 - Central and Eastern	12188254	23260
610	1	42	2	3	2	5	99	0	888	888	888	0	888	888	888	888	888	888	888	2	4	88	88	88	88	23745.8	2 - Central and Eastern	12188254	23260
611	1	42	2	2	2	5	2	0	888	888	888	0	888	888	888	888	888	888	888	1	888	99	99	99	99	23745.8	2 - Central and Eastern	12188254	23260
612	1	44	2	2	2	5	2	0	888	888	888	0	888	888	888	888	888	888	888	2	4	88	88	88	1	23745.8	2 - Central and Eastern	12188254	23260
613	1	47	2	1	4	4	2	0	888	888	888	0	888	888	888	888	888	888	888	1	888	99	99	99	99	23745.8	2 - Central and Eastern	12188254	23260
614	1	44	2	1	4	5	2	0	888	888	888	0	888	888	888	888	888	888	888	1	888	99	99	99	99	23745.8	2 - Central and Eastern	12188254	23260
615	1	43	2	4	3	5	2	0	888	888	888	0	888	888	888	888	888	888	888	3	999	88	88	88	88	23745.8	2 - Central and Eastern	12188254	23260
616	1	41	2	2	9	5	2	0	888	888	888	0	888	888	888	888	888	888	888	1	888	88	88	88	88	23745.8	2 - Central and Eastern	12188254	23260
617	1	46	2	2	5	3	2	0	888	888	888	0	888	888	888	888	888	888	888	3	4	99	99	99	99	23745.8	2 - Central and Eastern	12188254	23260
618	1	20	1	5	10	2	2	0	888	888	888	0	888	888	888	888	888	888	888	1	888	88	88	88	88	23157.3	2 - Central and Eastern	12188254	23260
619	1	21	1	5	10	2	2	0	888	888	888	0	888	888	888	888	888	888	888	1	888	88	88	88	88	23157.3	2 - Central and Eastern	12188254	23260
620	1	25	1	2	2	5	2	0	888	888	888	0	888	888	888	888	888	888	888	1	888	99	99	99	99	23157.3	2 - Central and Eastern	12188254	23260
621	1	20	1	5	10	1	2	0	888	888	888	0	888	888	888	888	888	888	888	1	888	88	88	88	88	23157.3	2 - Central and Eastern	12188254	23260
622	1	28	3	2	2	3	2	0	888	888	888	0	888	888	888	888	888	888	888	3	4	88	88	88	88	23157.3	2 - Central and Eastern	12188254	23260
623	1	63	2	2	5	3	2	1	27	5	5	0	888	888	888	888	888	888	888	3	4	88	88	88	88	23346.2	2 - Central and Eastern	12188254	23260
624	1	58	2	2	3	3	2	1	20	1	4	0	888	888	888	888	888	888	888	3	4	99	99	99	99	23346.2	2 - Central and Eastern	12188254	23260
625	1	33	3	4	9	5	2	1	25	1	4	6	3	0	0	0	0	0	4	3	4	88	88	88	88	23638.7	2 - Central and Eastern	12188254	23260
626	1	31	1	6	1	5	2	1	18	1	4	0	888	888	888	888	888	888	888	3	4	99	99	99	99	23638.7	2 - Central and Eastern	12188254	23260
627	1	37	3	1	5	3	2	1	21	1	1	9	9	0	0	0	0	0	4	3	4	88	88	1	1	23638.7	2 - Central and Eastern	12188254	23260
628	1	33	1	3	9	4	2	1	18	1	1	5	10	0	0	0	0	0	0	3	4	88	88	88	88	23638.7	2 - Central and Eastern	12188254	23260
629	1	44	3	2	3	7	2	1	19	1	1	0	888	888	888	888	888	888	888	3	2	88	88	88	88	23745.8	2 - Central and Eastern	12188254	23260
630	1	42	2	2	3	4	2	1	39	1	2	6	1	0	0	1	1	1	9	2	4	88	88	88	88	23745.8	2 - Central and Eastern	12188254	23260
631	1	28	1	2	2	4	2	1	18	1	4	8	0	9	0	0	0	0	0	3	4	2	3	4	6	23157.3	2 - Central and Eastern	12188254	23260
632	1	24	1	2	5	3	2	1	20	1	2	6	1	1	1	1	3	2	0	3	4	99	99	99	99	23157.3	2 - Central and Eastern	12188254	23260
633	2	27	1	3	9	3	99	1	888	1	2	8	1	3	2	2	3	2	0	3	4	99	99	99	99	22843.1	2 - Central and Eastern	12188254	23260
634	1	30	1	1	5	2	2	0	888	888	888	0	888	888	888	888	888	888	888	3	4	2	2	2	2	23638.7	4 - Western	2472978	22481.6
635	2	45	2	2	4	8	2	0	888	888	888	0	888	888	888	888	888	888	888	1	888	99	99	99	99	22134.8	4 - Western	2472978	22481.6
636	2	54	2	1	3	3	2	0	888	888	888	0	888	888	888	888	888	888	888	1	888	88	1	1	1	22866.3	4 - Western	2472978	22481.6
637	1	35	2	3	3	4	2	0	888	888	888	0	888	888	888	888	888	888	888	1	888	88	88	88	88	23638.7	4 - Western	2472978	22481.6
638	2	57	2	1	3	2	2	0	888	888	888	0	888	888	888	888	888	888	888	1	888	0	0	2	2	22866.3	4 - Western	2472978	22481.6
639	1	25	1	6	9	7	2	0	888	888	888	0	888	888	888	888	888	888	888	3	4	88	88	88	88	23157.3	4 - Western	2472978	22481.6
640	1	60	2	1	3	4	2	0	888	888	888	0	888	888	888	888	888	888	888	3	1	88	88	88	88	23346.2	4 - Western	2472978	22481.6
641	1	55	2	2	3	5	2	0	888	888	888	0	888	888	888	888	888	888	888	1	888	1	1	1	1	23346.2	4 - Western	2472978	22481.6
642	2	59	2	1	5	2	2	0	888	888	888	0	888	888	888	888	888	888	888	1	888	0	2	2	3	22866.3	4 - Western	2472978	22481.6
643	2	60	4	1	3	2	2	0	888	888	888	0	888	888	888	888	888	888	888	3	4	0	0	2	2	22866.3	4 - Western	2472978	22481.6
644	2	25	1	4	9	4	2	0	888	888	888	0	888	888	888	888	888	888	888	1	888	88	88	88	88	22843.1	4 - Western	2472978	22481.6
645	1	42	1	3	3	3	2	0	888	888	888	0	888	888	888	888	888	888	888	1	888	1	1	2	2	23745.8	4 - Western	2472978	22481.6
646	1	53	2	2	3	3	2	0	888	888	888	0	888	888	888	888	888	888	888	3	4	88	88	88	88	23346.2	4 - Western	2472978	22481.6
647	2	57	2	2	9	2	2	0	888	888	888	0	888	888	888	888	888	888	888	1	888	0	1	1	2	22866.3	4 - Western	2472978	22481.6
648	1	73	2	1	3	3	2	1	20	1	1	0	888	888	888	888	888	888	888	3	1	1	1	1	1	23346.2	4 - Western	2472978	22481.6
649	2	29	2	3	5	5	2	1	15	1	4	3	9	9	0	0	0	0	9	3	4	2	2	2	2	22843.1	4 - Western	2472978	22481.6
650	2	73	4	1	6	1	2	1	25	1	2	0	888	888	888	888	888	888	888	1	888	0	2	2	3	22866.3	4 - Western	2472978	22481.6
651	1	40	2	4	3	5	2	1	999	1	5	0	888	888	888	888	888	888	888	3	4	2	3	3	3	23745.8	4 - Western	2472978	22481.6
652	2	36	3	3	3	3	2	1	35	1	5	0	888	888	888	888	888	888	888	1	888	1	2	3	3	23892.3	4 - Western	2472978	22481.6
653	2	41	2	4	4	3	2	1	41	4	5	3	10	0	0	0	0	0	9	1	888	88	88	88	88	22134.8	4 - Western	2472978	22481.6
654	2	46	2	6	6	1	2	0	888	888	888	0	888	888	888	888	888	888	888	1	888	0	0	1	1	22134.8	4 - Western	2472978	22481.6
655	2	36	2	1	3	3	2	0	888	888	888	0	888	888	888	888	888	888	888	1	888	0	0	1	2	23892.3	4 - Western	2472978	22481.6
656	2	57	2	1	7	1	2	0	888	888	888	0	888	888	888	888	888	888	888	1	888	1	2	2	2	22866.3	4 - Western	2472978	22481.6
657	2	24	1	2	5	2	2	0	888	888	888	0	888	888	888	888	888	888	888	1	888	0	1	2	2	22843.1	4 - Western	2472978	22481.6
658	1	44	2	1	7	3	2	0	888	888	888	0	888	888	888	888	888	888	888	3	1	0	2	2	2	23745.8	4 - Western	2472978	22481.6
659	1	58	2	2	3	3	2	0	888	888	888	0	888	888	888	888	888	888	888	1	888	0	1	3	3	23346.2	4 - Western	2472978	22481.6
660	2	40	3	3	3	3	2	0	888	888	888	0	888	888	888	888	888	888	888	1	888	0	0	1	1	22134.8	4 - Western	2472978	22481.6
661	1	55	2	1	7	2	2	0	888	888	888	0	888	888	888	888	888	888	888	3	1	0	0	1	1	23346.2	4 - Western	2472978	22481.6
662	2	29	1	3	3	6	2	0	888	888	888	0	888	888	888	888	888	888	888	3	3	88	2	2	2	22843.1	4 - Western	2472978	22481.6
663	2	64	1	1	3	5	2	0	888	888	888	0	888	888	888	888	888	888	888	1	888	88	88	88	88	22866.3	4 - Western	2472978	22481.6
664	1	31	1	6	4	9	2	0	888	888	888	0	888	888	888	888	888	888	888	3	4	99	99	99	99	23638.7	4 - Western	2472978	22481.6
665	1	30	3	1	4	10	2	0	888	888	888	0	888	888	888	888	888	888	888	1	888	99	99	99	99	23638.7	4 - Western	2472978	22481.6
666	1	28	2	3	5	5	2	0	888	888	888	0	888	888	888	888	888	888	888	3	4	1	1	1	1	23157.3	4 - Western	2472978	22481.6
667	2	57	2	2	3	5	2	0	888	888	888	0	888	888	888	888	888	888	888	1	888	88	88	88	88	22866.3	4 - Western	2472978	22481.6
668	2	42	1	3	3	5	2	0	888	888	888	0	888	888	888	888	888	888	888	1	888	1	1	1	1	22134.8	4 - Western	2472978	22481.6
669	1	51	2	3	5	4	2	0	888	888	888	0	888	888	888	888	888	888	888	1	888	3	3	3	3	23346.2	4 - Western	2472978	22481.6
670	2	33	2	6	1	7	2	0	888	888	888	0	888	888	888	888	888	888	888	1	888	88	88	88	88	23892.3	4 - Western	2472978	22481.6
671	1	47	1	1	5	2	2	0	888	888	888	0	888	888	888	888	888	888	888	3	4	0	0	1	1	23745.8	4 - Western	2472978	22481.6
672	1	60	2	1	9	3	3	0	888	888	888	0	888	888	888	888	888	888	888	3	4	1	1	1	1	23346.2	4 - Western	2472978	22481.6
673	2	44	2	2	9	3	99	0	888	888	888	0	888	888	888	888	888	888	888	1	888	88	88	88	88	22134.8	4 - Western	2472978	22481.6
674	2	50	2	6	3	4	2	0	888	888	888	0	888	888	888	888	888	888	888	1	888	88	88	88	88	22866.3	4 - Western	2472978	22481.6
675	2	54	2	2	5	3	2	0	888	888	888	0	888	888	888	888	888	888	888	1	888	1	1	1	2	22866.3	4 - Western	2472978	22481.6
676	2	26	1	4	3	5	2	0	888	888	888	0	888	888	888	888	888	888	888	1	888	88	88	88	88	22843.1	4 - Western	2472978	22481.6
677	2	31	1	6	99	4	2	0	888	888	888	0	888	888	888	888	888	888	888	3	1	0	1	1	2	23892.3	4 - Western	2472978	22481.6
678	2	63	2	2	3	3	2	0	888	888	888	0	888	888	888	888	888	888	888	1	888	88	88	88	88	22866.3	4 - Western	2472978	22481.6
679	1	28	3	4	4	6	2	0	888	888	888	0	888	888	888	888	888	888	888	3	4	88	88	88	88	23157.3	4 - Western	2472978	22481.6
680	2	68	2	1	3	2	2	1	35	4	5	0	888	888	888	888	888	888	888	1	888	0	0	1	1	22866.3	4 - Western	2472978	22481.6
681	2	28	2	2	3	3	2	1	27	1	5	1	0	0	0	0	0	0	9	1	888	1	2	2	2	22843.1	4 - Western	2472978	22481.6
682	2	73	4	1	3	2	2	1	30	1	5	0	888	888	888	888	888	888	888	3	4	1	1	2	2	22866.3	4 - Western	2472978	22481.6
683	1	25	1	6	2	4	2	1	18	1	2	4	9	9	9	9	9	9	2	3	4	2	2	2	2	23157.3	4 - Western	2472978	22481.6
684	2	43	1	2	3	3	2	1	30	1	5	3	10	0	0	0	0	0	9	3	4	0	2	2	2	22134.8	4 - Western	2472978	22481.6
685	1	62	2	1	5	2	2	1	999	1	5	0	888	888	888	888	888	888	888	3	1	0	1	2	2	23346.2	4 - Western	2472978	22481.6
686	1	42	2	2	3	4	2	1	18	1	4	0	888	888	888	888	888	888	888	1	888	1	1	1	1	23745.8	4 - Western	2472978	22481.6
687	2	52	2	1	3	4	2	1	40	99	5	1	10	0	0	0	0	0	9	3	2	2	2	2	2	22866.3	4 - Western	2472978	22481.6
688	1	53	1	1	9	2	2	1	50	2	5	0	888	888	888	888	888	888	888	3	4	0	1	1	1	23346.2	4 - Western	2472978	22481.6
689	1	35	2	3	5	4	2	1	34	1	5	5	10	0	0	0	0	0	4	3	4	0	1	1	2	23638.7	4 - Western	2472978	22481.6
690	2	58	2	2	3	4	2	0	888	888	888	0	888	888	888	888	888	888	888	1	888	88	88	88	88	22866.3	4 - Western	2472978	22481.6
691	2	24	1	2	5	2	2	0	888	888	888	0	888	888	888	888	888	888	888	1	888	2	2	2	2	22843.1	4 - Western	2472978	22481.6
692	2	43	1	6	3	4	2	0	888	888	888	0	888	888	888	888	888	888	888	1	888	1	1	1	1	22134.8	4 - Western	2472978	22481.6
693	2	51	2	1	3	3	2	0	888	888	888	0	888	888	888	888	888	888	888	1	888	88	1	1	1	22866.3	4 - Western	2472978	22481.6
694	1	62	4	99	5	2	2	1	17	1	1	0	888	888	888	888	888	888	888	3	1	2	2	2	2	23346.2	4 - Western	2472978	22481.6
695	1	46	1	1	3	4	2	0	888	888	888	0	888	888	888	888	888	888	888	3	4	1	2	2	2	23745.8	4 - Western	2472978	22481.6
696	2	38	3	4	5	3	2	1	38	4	5	1	10	0	0	0	0	0	0	1	888	99	99	99	99	23892.3	4 - Western	2472978	22481.6
697	2	66	4	2	3	3	2	0	888	888	888	0	888	888	888	888	888	888	888	1	888	1	1	2	3	22866.3	4 - Western	2472978	22481.6
698	1	64	4	1	5	3	2	1	20	1	4	0	888	888	888	888	888	888	888	3	4	0	1	1	1	23346.2	4 - Western	2472978	22481.6
699	1	25	1	3	2	2	2	1	18	1	2	6	9	9	0	0	0	0	9	3	4	3	4	4	4	23157.3	4 - Western	2472978	22481.6
700	2	67	2	1	6	1	2	0	888	888	888	0	888	888	888	888	888	888	888	1	888	0	0	0	0	22866.3	4 - Western	2472978	22481.6
701	1	29	1	4	2	3	2	0	888	888	888	0	888	888	888	888	888	888	888	1	888	2	3	3	3	23157.3	4 - Western	2472978	22481.6
702	1	62	2	2	5	3	2	1	28	3	5	6	10	0	0	0	0	0	9	3	1	10	10	10	10	23346.2	4 - Western	2472978	22481.6
703	2	43	2	2	5	2	1	0	888	888	888	0	888	888	888	888	888	888	888	1	888	3	4	4	4	22134.8	4 - Western	2472978	22481.6
704	2	35	2	3	3	3	2	0	888	888	888	0	888	888	888	888	888	888	888	1	888	3	3	3	3	23892.3	4 - Western	2472978	22481.6
705	1	45	2	2	5	2	2	0	888	888	888	0	888	888	888	888	888	888	888	3	4	3	3	3	3	23745.8	4 - Western	2472978	22481.6
706	1	33	2	6	4	5	2	0	888	888	888	0	888	888	888	888	888	888	888	1	888	1	1	1	1	23638.7	4 - Western	2472978	22481.6
707	1	40	1	2	3	3	2	0	888	888	888	0	888	888	888	888	888	888	888	1	888	1	1	2	2	23745.8	4 - Western	2472978	22481.6
708	2	62	2	1	6	1	2	1	62	3	5	1	10	0	0	0	0	0	4	1	888	1	1	2	2	22866.3	4 - Western	2472978	22481.6
709	2	69	2	1	3	1	2	0	888	888	888	0	888	888	888	888	888	888	888	1	888	88	88	88	88	22866.3	4 - Western	2472978	22481.6
710	2	48	2	3	9	4	2	0	888	888	888	0	888	888	888	888	888	888	888	1	888	0	1	1	1	22134.8	4 - Western	2472978	22481.6
711	1	21	1	3	5	3	2	1	20	1	4	8	1	4	0	2	0	0	4	3	4	1	2	3	3	23157.3	4 - Western	2472978	22481.6
712	1	63	2	1	5	2	2	1	60	4	5	1	10	0	0	0	0	0	0	3	4	1	1	2	2	23346.2	4 - Western	2472978	22481.6
713	1	70	4	1	6	1	2	1	29	1	1	0	888	888	888	888	888	888	888	3	1	99	99	99	99	23346.2	4 - Western	2472978	22481.6
714	1	32	1	4	2	5	2	0	888	888	888	0	888	888	888	888	888	888	888	2	4	88	88	88	88	23638.7	4 - Western	2472978	22481.6
715	1	26	1	3	9	4	2	0	888	888	888	0	888	888	888	888	888	888	888	3	4	88	88	88	88	23157.3	4 - Western	2472978	22481.6
716	1	57	2	2	3	4	2	0	888	888	888	0	888	888	888	888	888	888	888	1	888	88	88	88	88	23346.2	4 - Western	2472978	22481.6
717	1	41	2	4	2	3	2	0	888	888	888	0	888	888	888	888	888	888	888	3	4	2	3	3	4	23745.8	4 - Western	2472978	22481.6
718	1	23	1	6	2	3	2	0	888	888	888	0	888	888	888	888	888	888	888	1	888	88	88	88	88	23157.3	4 - Western	2472978	22481.6
719	1	27	1	2	10	1	2	0	888	888	888	0	888	888	888	888	888	888	888	1	888	3	3	3	3	23157.3	4 - Western	2472978	22481.6
720	2	61	2	1	6	1	2	0	888	888	888	0	888	888	888	888	888	888	888	1	888	88	88	88	88	22866.3	4 - Western	2472978	22481.6
721	2	50	2	1	3	2	2	0	888	888	888	0	888	888	888	888	888	888	888	1	888	88	88	88	88	22866.3	4 - Western	2472978	22481.6
722	2	35	2	2	4	5	2	0	888	888	888	0	888	888	888	888	888	888	888	1	888	88	88	88	88	23892.3	4 - Western	2472978	22481.6
723	1	23	1	1	3	3	2	1	13	1	1	8	9	9	9	9	9	9	9	3	4	88	88	88	88	23157.3	4 - Western	2472978	22481.6
724	2	41	2	6	1	11	2	0	888	888	888	0	888	888	888	888	888	888	888	1	888	88	88	88	88	22134.8	4 - Western	2472978	22481.6
725	1	60	2	1	5	2	2	0	888	888	888	0	888	888	888	888	888	888	888	1	888	88	88	88	88	23346.2	4 - Western	2472978	22481.6
726	2	57	4	1	3	3	2	1	28	1	4	0	888	888	888	888	888	888	888	3	4	3	3	3	3	22866.3	4 - Western	2472978	22481.6
727	1	52	2	1	3	3	2	0	888	888	888	9	9	9	9	9	9	9	9	3	4	88	88	88	88	23346.2	4 - Western	2472978	22481.6
728	1	39	2	2	5	2	2	1	30	1	2	0	888	888	888	888	888	888	888	3	4	3	3	4	4	23638.7	4 - Western	2472978	22481.6
729	1	46	2	2	3	3	2	1	19	1	4	0	888	888	888	888	888	888	888	3	4	88	88	88	88	23745.8	4 - Western	2472978	22481.6
730	1	37	2	2	5	2	2	1	25	1	2	6	10	9	9	9	9	0	9	3	4	88	88	88	88	23638.7	4 - Western	2472978	22481.6
731	1	23	1	1	5	2	2	1	20	1	2	8	9	9	0	0	9	9	9	3	4	10	10	10	10	23157.3	4 - Western	2472978	22481.6
732	2	28	2	2	3	2	2	0	888	888	888	0	888	888	888	888	888	888	888	1	888	3	3	3	3	22843.1	4 - Western	2472978	22481.6
733	2	68	2	1	6	1	2	1	40	3	11	9	10	0	0	0	0	0	0	1	888	2	4	4	4	22866.3	4 - Western	2472978	22481.6
734	1	36	1	2	5	3	2	0	888	888	888	0	888	888	888	888	888	888	888	3	4	88	88	88	88	23638.7	4 - Western	2472978	22481.6
735	1	41	1	2	5	3	2	1	35	1	99	7	0	3	3	0	0	9	9	3	4	1	1	1	1	23745.8	4 - Western	2472978	22481.6
736	1	60	2	1	6	1	2	1	59	2	5	1	10	0	0	0	0	0	0	3	4	2	2	2	2	23346.2	4 - Western	2472978	22481.6
737	2	24	1	6	3	4	2	0	888	888	888	0	888	888	888	888	888	888	888	1	888	88	88	88	88	22843.1	4 - Western	2472978	22481.6
738	2	38	2	3	3	4	2	1	30	1	99	0	888	888	888	888	888	888	888	3	4	99	99	99	99	23892.3	4 - Western	2472978	22481.6
739	2	66	4	1	3	3	2	1	66	2	5	1	10	0	0	0	0	0	0	1	888	5	5	5	5	22866.3	4 - Western	2472978	22481.6
740	2	41	2	4	3	3	2	0	888	888	888	0	888	888	888	888	888	888	888	1	888	1	2	2	2	22134.8	4 - Western	2472978	22481.6
741	1	27	1	2	5	3	2	1	21	1	1	8	1	3	2	0	1	2	0	3	4	2	2	2	2	23157.3	4 - Western	2472978	22481.6
742	2	65	4	1	5	3	2	0	888	888	888	0	888	888	888	888	888	888	888	1	888	3	3	3	3	22866.3	4 - Western	2472978	22481.6
743	1	55	2	1	5	2	2	0	888	888	888	0	888	888	888	888	888	888	888	3	3	88	88	88	88	23346.2	4 - Western	2472978	22481.6
744	2	30	2	6	4	4	2	0	888	888	888	0	888	888	888	888	888	888	888	1	888	88	88	1	1	23892.3	3 - Northern	4793608	23046.2
745	1	69	2	1	6	1	2	0	888	888	888	0	888	888	888	888	888	888	888	3	1	88	88	88	88	23346.2	3 - Northern	4793608	23046.2
746	2	46	2	4	4	3	2	0	888	888	888	0	888	888	888	888	888	888	888	1	888	99	99	88	88	22134.8	3 - Northern	4793608	23046.2
747	1	31	2	4	2	4	2	0	888	888	888	0	888	888	888	888	888	888	888	1	888	88	88	99	99	23638.7	3 - Northern	4793608	23046.2
748	2	35	2	4	2	4	2	0	888	888	888	0	888	888	888	888	888	888	888	1	888	99	99	88	88	23892.3	3 - Northern	4793608	23046.2
749	2	54	2	3	4	3	2	0	888	888	888	0	888	888	888	888	888	888	888	1	888	88	88	88	88	22866.3	3 - Northern	4793608	23046.2
750	2	56	2	3	4	4	2	0	888	888	888	0	888	888	888	888	888	888	888	1	888	88	88	88	88	22866.3	3 - Northern	4793608	23046.2
751	2	47	2	3	3	3	2	0	888	888	888	0	888	888	888	888	888	888	888	1	888	88	88	88	88	22134.8	3 - Northern	4793608	23046.2
752	2	56	2	2	6	3	2	0	888	888	888	0	888	888	888	888	888	888	888	1	888	88	88	88	88	22866.3	3 - Northern	4793608	23046.2
753	1	30	2	3	4	5	2	0	888	888	888	0	888	888	888	888	888	888	888	3	4	88	88	88	88	23638.7	3 - Northern	4793608	23046.2
754	1	28	1	2	5	2	2	0	888	888	888	0	888	888	888	888	888	888	888	1	888	88	88	88	88	23157.3	3 - Northern	4793608	23046.2
755	2	57	2	2	3	3	2	0	888	888	888	0	888	888	888	888	888	888	888	1	888	88	88	88	88	22866.3	3 - Northern	4793608	23046.2
756	1	24	1	6	2	4	2	0	888	888	888	0	888	888	888	888	888	888	888	3	3	88	88	88	88	23157.3	3 - Northern	4793608	23046.2
757	1	52	2	3	5	3	2	0	888	888	888	0	888	888	888	888	888	888	888	3	1	88	88	88	88	23346.2	3 - Northern	4793608	23046.2
758	1	41	2	3	3	2	2	0	888	888	888	0	888	888	888	888	888	888	888	3	1	88	88	88	88	23745.8	3 - Northern	4793608	23046.2
759	1	64	2	3	5	2	2	0	888	888	888	0	888	888	888	888	888	888	888	2	1	88	88	88	88	23346.2	3 - Northern	4793608	23046.2
760	2	55	2	2	5	2	2	0	888	888	888	0	888	888	888	888	888	888	888	1	888	88	88	88	88	22866.3	3 - Northern	4793608	23046.2
761	1	53	2	2	5	3	2	0	888	888	888	0	888	888	888	888	888	888	888	3	3	88	88	88	88	23346.2	3 - Northern	4793608	23046.2
762	2	33	2	3	4	4	2	0	888	888	888	0	888	888	888	888	888	888	888	1	888	88	88	88	88	23892.3	3 - Northern	4793608	23046.2
763	2	64	4	2	5	2	2	0	888	888	888	0	888	888	888	888	888	888	888	1	888	88	88	88	88	22866.3	3 - Northern	4793608	23046.2
764	2	52	2	2	3	3	2	0	888	888	888	0	888	888	888	888	888	888	888	1	888	88	88	88	88	22866.3	3 - Northern	4793608	23046.2
765	2	59	2	2	3	3	2	0	888	888	888	0	888	888	888	888	888	888	888	1	888	88	88	88	88	22866.3	3 - Northern	4793608	23046.2
766	2	27	1	3	2	3	2	0	888	888	888	0	888	888	888	888	888	888	888	1	888	88	88	88	88	22843.1	3 - Northern	4793608	23046.2
767	2	24	1	6	2	3	2	0	888	888	888	0	888	888	888	888	888	888	888	1	888	88	88	88	88	22843.1	3 - Northern	4793608	23046.2
768	1	50	2	1	5	3	2	0	888	888	888	0	888	888	888	888	888	888	888	1	888	88	88	88	88	23346.2	3 - Northern	4793608	23046.2
769	1	65	2	2	3	3	2	0	888	888	888	0	888	888	888	888	888	888	888	1	888	99	88	99	88	23346.2	3 - Northern	4793608	23046.2
770	1	60	4	2	6	5	2	0	888	888	888	0	888	888	888	888	888	888	888	1	888	88	88	88	88	23346.2	3 - Northern	4793608	23046.2
771	1	63	2	2	3	5	2	0	888	888	888	0	888	888	888	888	888	888	888	1	888	88	99	88	88	23346.2	3 - Northern	4793608	23046.2
772	1	55	2	1	5	2	2	0	888	888	888	0	888	888	888	888	888	888	888	3	4	88	99	1	88	23346.2	3 - Northern	4793608	23046.2
773	1	24	1	5	10	2	2	0	888	888	888	0	888	888	888	888	888	888	888	3	4	88	88	88	88	23157.3	3 - Northern	4793608	23046.2
774	1	22	1	5	10	1	2	0	888	888	888	0	888	888	888	888	888	888	888	3	4	1	88	99	99	23157.3	3 - Northern	4793608	23046.2
775	1	38	5	4	2	11	2	0	888	888	888	0	888	888	888	888	888	888	888	1	888	88	99	88	88	23638.7	3 - Northern	4793608	23046.2
776	1	35	2	4	3	5	2	0	888	888	888	0	888	888	888	888	888	888	888	1	888	88	88	1	88	23638.7	3 - Northern	4793608	23046.2
777	1	47	2	6	2	3	2	0	888	888	888	0	888	888	888	888	888	888	888	1	888	88	99	88	99	23745.8	3 - Northern	4793608	23046.2
778	1	45	1	6	2	6	2	0	888	888	888	0	888	888	888	888	888	888	888	1	888	99	99	99	99	23745.8	3 - Northern	4793608	23046.2
779	2	65	2	4	3	5	2	0	888	888	888	0	888	888	888	888	888	888	888	1	888	88	88	1	88	22866.3	3 - Northern	4793608	23046.2
780	2	58	2	1	3	6	2	0	888	888	888	0	888	888	888	888	888	888	888	1	888	88	99	99	88	22866.3	3 - Northern	4793608	23046.2
781	2	68	2	2	3	3	2	0	888	888	888	0	888	888	888	888	888	888	888	1	888	1	88	88	99	22866.3	3 - Northern	4793608	23046.2
782	2	56	2	2	3	3	2	0	888	888	888	0	888	888	888	888	888	888	888	1	888	88	99	99	88	22866.3	3 - Northern	4793608	23046.2
783	2	71	4	2	6	2	2	0	888	888	888	0	888	888	888	888	888	888	888	1	888	99	88	88	99	22866.3	3 - Northern	4793608	23046.2
784	2	69	2	2	3	4	2	0	888	888	888	0	888	888	888	888	888	888	888	1	888	99	88	99	88	22866.3	3 - Northern	4793608	23046.2
785	2	27	1	6	5	4	2	0	888	888	888	0	888	888	888	888	888	888	888	1	888	88	88	88	88	22843.1	3 - Northern	4793608	23046.2
786	1	56	2	2	7	2	2	0	888	888	888	0	888	888	888	888	888	888	888	3	1	88	88	88	88	23346.2	3 - Northern	4793608	23046.2
787	2	63	2	2	3	3	2	0	888	888	888	0	888	888	888	888	888	888	888	1	888	1	99	88	99	22866.3	3 - Northern	4793608	23046.2
788	1	64	2	2	5	2	2	0	888	888	888	0	888	888	888	888	888	888	888	1	888	88	99	1	99	23346.2	3 - Northern	4793608	23046.2
789	2	49	2	2	5	5	2	0	888	888	888	0	888	888	888	888	888	888	888	3	1	99	88	99	88	22134.8	3 - Northern	4793608	23046.2
790	2	23	1	5	10	2	2	0	888	888	888	0	888	888	888	888	888	888	888	1	888	99	88	99	88	22843.1	3 - Northern	4793608	23046.2
791	2	47	3	3	5	5	2	0	888	888	888	0	888	888	888	888	888	888	888	1	888	88	88	99	99	22134.8	3 - Northern	4793608	23046.2
792	2	45	2	4	3	5	2	0	888	888	888	0	888	888	888	888	888	888	888	3	1	88	99	99	88	22134.8	3 - Northern	4793608	23046.2
793	1	63	2	1	5	2	2	1	15	1	1	0	888	888	888	888	888	888	888	3	1	88	88	99	99	23346.2	3 - Northern	4793608	23046.2
794	1	45	1	3	3	3	2	1	44	2	5	1	10	0	0	0	0	0	4	1	888	99	99	99	99	23745.8	3 - Northern	4793608	23046.2
795	1	60	2	1	3	3	2	1	20	1	1	0	888	888	888	888	888	888	888	3	4	88	88	88	88	23346.2	3 - Northern	4793608	23046.2
796	2	29	1	4	5	4	2	1	16	5	1	0	888	888	888	888	888	888	888	1	888	99	99	99	99	22843.1	3 - Northern	4793608	23046.2
797	1	41	2	3	2	4	2	1	999	1	1	0	888	888	888	888	888	888	888	1	888	1	88	99	1	23745.8	3 - Northern	4793608	23046.2
798	2	56	2	2	3	3	2	1	56	2	5	1	10	0	0	0	0	0	0	1	888	88	99	1	88	22866.3	3 - Northern	4793608	23046.2
799	1	55	1	6	2	5	2	0	888	888	888	0	888	888	888	888	888	888	888	1	888	99	99	88	88	23346.2	3 - Northern	4793608	23046.2
800	1	60	2	1	11	1	2	0	888	888	888	0	888	888	888	888	888	888	888	1	888	88	99	88	99	23346.2	3 - Northern	4793608	23046.2
801	1	42	1	3	5	5	2	0	888	888	888	0	888	888	888	888	888	888	888	1	888	99	88	88	99	23745.8	3 - Northern	4793608	23046.2
802	1	45	2	6	1	6	2	0	888	888	888	0	888	888	888	888	888	888	888	1	888	88	88	88	99	23745.8	3 - Northern	4793608	23046.2
803	1	38	2	4	3	6	2	0	888	888	888	0	888	888	888	888	888	888	888	1	888	88	88	88	88	23638.7	3 - Northern	4793608	23046.2
804	1	35	2	4	1	6	2	0	888	888	888	0	888	888	888	888	888	888	888	1	888	88	99	88	99	23638.7	3 - Northern	4793608	23046.2
805	1	28	1	6	2	4	2	0	888	888	888	0	888	888	888	888	888	888	888	1	888	88	88	88	88	23157.3	3 - Northern	4793608	23046.2
806	1	25	1	6	2	5	2	0	888	888	888	0	888	888	888	888	888	888	888	1	888	88	99	88	88	23157.3	3 - Northern	4793608	23046.2
807	1	29	1	3	5	5	2	0	888	888	888	0	888	888	888	888	888	888	888	3	1	88	88	99	99	23157.3	3 - Northern	4793608	23046.2
808	1	32	1	2	3	6	2	0	888	888	888	0	888	888	888	888	888	888	888	3	999	88	99	88	99	23638.7	3 - Northern	4793608	23046.2
809	1	41	2	3	5	3	2	0	888	888	888	0	888	888	888	888	888	888	888	1	888	88	88	99	88	23745.8	3 - Northern	4793608	23046.2
810	1	62	2	1	11	1	2	0	888	888	888	0	888	888	888	888	888	888	888	1	888	99	99	99	88	23346.2	3 - Northern	4793608	23046.2
811	1	26	2	4	2	4	2	0	888	888	888	0	888	888	888	888	888	888	888	1	888	88	99	88	99	23157.3	3 - Northern	4793608	23046.2
812	1	56	2	2	3	3	2	0	888	888	888	0	888	888	888	888	888	888	888	3	4	88	88	99	99	23346.2	3 - Northern	4793608	23046.2
813	1	55	2	3	5	3	2	0	888	888	888	0	888	888	888	888	888	888	888	3	1	88	88	88	88	23346.2	3 - Northern	4793608	23046.2
814	1	69	4	2	6	2	2	0	888	888	888	0	888	888	888	888	888	888	888	1	888	88	88	88	88	23346.2	3 - Northern	4793608	23046.2
815	2	46	2	4	2	4	2	0	888	888	888	0	888	888	888	888	888	888	888	1	888	88	99	99	88	22134.8	3 - Northern	4793608	23046.2
816	2	59	2	4	3	5	2	0	888	888	888	0	888	888	888	888	888	888	888	1	888	88	88	1	1	22866.3	3 - Northern	4793608	23046.2
817	2	60	2	2	2	3	2	0	888	888	888	0	888	888	888	888	888	888	888	1	888	88	99	1	2	22866.3	3 - Northern	4793608	23046.2
818	2	54	2	2	2	5	2	0	888	888	888	0	888	888	888	888	888	888	888	1	888	88	88	1	1	22866.3	3 - Northern	4793608	23046.2
819	2	73	2	4	2	5	2	0	888	888	888	0	888	888	888	888	888	888	888	1	888	88	88	1	99	22866.3	3 - Northern	4793608	23046.2
820	2	69	2	6	6	5	2	0	888	888	888	0	888	888	888	888	888	888	888	1	888	88	99	1	1	22866.3	3 - Northern	4793608	23046.2
821	2	67	2	6	6	6	2	0	888	888	888	0	888	888	888	888	888	888	888	1	888	88	88	99	88	22866.3	3 - Northern	4793608	23046.2
822	2	37	2	6	2	5	2	0	888	888	888	0	888	888	888	888	888	888	888	1	888	88	99	88	99	23892.3	3 - Northern	4793608	23046.2
823	2	29	1	6	2	4	2	0	888	888	888	0	888	888	888	888	888	888	888	1	888	88	99	1	99	22843.1	3 - Northern	4793608	23046.2
824	2	28	1	6	2	4	2	0	888	888	888	0	888	888	888	888	888	888	888	1	888	88	99	1	99	22843.1	3 - Northern	4793608	23046.2
825	2	23	1	6	2	4	2	0	888	888	888	0	888	888	888	888	888	888	888	1	888	88	99	88	99	22843.1	3 - Northern	4793608	23046.2
826	2	34	2	3	4	4	2	0	888	888	888	0	888	888	888	888	888	888	888	3	1	88	88	88	88	23892.3	3 - Northern	4793608	23046.2
827	2	30	2	3	4	4	2	0	888	888	888	0	888	888	888	888	888	888	888	3	1	88	88	88	1	23892.3	3 - Northern	4793608	23046.2
828	2	37	2	3	4	4	2	0	888	888	888	0	888	888	888	888	888	888	888	1	888	88	88	88	88	23892.3	3 - Northern	4793608	23046.2
829	2	41	2	3	2	4	2	0	888	888	888	0	888	888	888	888	888	888	888	1	888	88	88	88	88	22134.8	3 - Northern	4793608	23046.2
830	2	56	2	3	4	4	2	0	888	888	888	0	888	888	888	888	888	888	888	1	888	88	88	88	88	22866.3	3 - Northern	4793608	23046.2
831	2	67	2	1	3	2	2	0	888	888	888	0	888	888	888	888	888	888	888	1	888	88	88	88	88	22866.3	3 - Northern	4793608	23046.2
832	2	65	2	1	5	2	2	0	888	888	888	0	888	888	888	888	888	888	888	1	888	88	88	88	88	22866.3	3 - Northern	4793608	23046.2
833	2	61	2	1	3	2	2	0	888	888	888	0	888	888	888	888	888	888	888	1	888	88	88	88	88	22866.3	3 - Northern	4793608	23046.2
834	2	70	2	1	4	2	2	0	888	888	888	0	888	888	888	888	888	888	888	1	888	0	0	0	0	22866.3	3 - Northern	4793608	23046.2
835	1	38	2	4	2	4	2	0	888	888	888	0	888	888	888	888	888	888	888	3	3	88	88	88	88	23638.7	3 - Northern	4793608	23046.2
836	2	59	2	2	3	3	2	0	888	888	888	0	888	888	888	888	888	888	888	1	888	88	88	88	88	22866.3	3 - Northern	4793608	23046.2
837	2	29	1	6	2	4	2	0	888	888	888	0	888	888	888	888	888	888	888	1	888	88	88	88	88	22843.1	3 - Northern	4793608	23046.2
838	1	61	2	2	3	3	2	0	888	888	888	0	888	888	888	888	888	888	888	1	888	88	88	88	88	23346.2	3 - Northern	4793608	23046.2
839	1	54	2	3	4	4	2	0	888	888	888	0	888	888	888	888	888	888	888	3	1	88	88	88	88	23346.2	3 - Northern	4793608	23046.2
840	2	62	2	1	3	3	2	0	888	888	888	0	888	888	888	888	888	888	888	2	1	88	88	88	88	22866.3	3 - Northern	4793608	23046.2
841	2	45	2	3	3	4	2	0	888	888	888	0	888	888	888	888	888	888	888	1	888	88	88	88	1	22134.8	3 - Northern	4793608	23046.2
842	2	61	2	2	3	3	2	0	888	888	888	0	888	888	888	888	888	888	888	1	888	88	88	88	88	22866.3	3 - Northern	4793608	23046.2
843	1	59	2	2	5	3	2	0	888	888	888	0	888	888	888	888	888	888	888	3	1	88	88	88	88	23346.2	3 - Northern	4793608	23046.2
844	2	50	2	2	3	3	2	0	888	888	888	0	888	888	888	888	888	888	888	1	888	88	88	88	88	22866.3	3 - Northern	4793608	23046.2
845	2	31	2	3	3	3	2	0	888	888	888	0	888	888	888	888	888	888	888	1	888	88	88	88	88	23892.3	3 - Northern	4793608	23046.2
846	2	22	1	2	10	1	2	0	888	888	888	0	888	888	888	888	888	888	888	1	888	88	88	88	88	22843.1	3 - Northern	4793608	23046.2
847	2	27	1	6	4	5	2	0	888	888	888	0	888	888	888	888	888	888	888	1	888	88	88	88	88	22843.1	3 - Northern	4793608	23046.2
848	2	29	1	6	2	4	2	0	888	888	888	0	888	888	888	888	888	888	888	1	888	88	88	88	88	22843.1	3 - Northern	4793608	23046.2
849	2	25	1	6	2	4	3	0	888	888	888	0	888	888	888	888	888	888	888	1	888	88	88	1	1	22843.1	3 - Northern	4793608	23046.2
850	1	55	2	3	4	4	2	0	888	888	888	0	888	888	888	888	888	888	888	3	3	88	88	88	88	23346.2	3 - Northern	4793608	23046.2
851	1	68	4	2	6	1	2	0	888	888	888	0	888	888	888	888	888	888	888	3	1	88	88	88	88	23346.2	3 - Northern	4793608	23046.2
852	1	58	2	2	4	4	2	0	888	888	888	0	888	888	888	888	888	888	888	3	3	88	88	88	88	23346.2	3 - Northern	4793608	23046.2
853	1	62	2	2	3	2	2	0	888	888	888	0	888	888	888	888	888	888	888	3	1	88	88	88	88	23346.2	3 - Northern	4793608	23046.2
854	1	32	2	4	2	4	2	0	888	888	888	0	888	888	888	888	888	888	888	3	4	88	88	88	88	23638.7	3 - Northern	4793608	23046.2
855	1	25	1	6	2	4	2	0	888	888	888	0	888	888	888	888	888	888	888	3	4	88	88	88	88	23157.3	3 - Northern	4793608	23046.2
856	1	23	1	6	11	1	2	0	888	888	888	0	888	888	888	888	888	888	888	3	4	88	88	88	88	23157.3	3 - Northern	4793608	23046.2
857	1	48	2	2	4	4	2	0	888	888	888	0	888	888	888	888	888	888	888	3	1	88	88	88	88	23745.8	3 - Northern	4793608	23046.2
858	1	46	2	2	3	3	2	0	888	888	888	0	888	888	888	888	888	888	888	3	2	88	88	88	88	23745.8	3 - Northern	4793608	23046.2
859	1	46	2	3	4	4	2	0	888	888	888	0	888	888	888	888	888	888	888	1	888	88	88	1	1	23745.8	3 - Northern	4793608	23046.2
860	2	48	2	3	4	4	2	0	888	888	888	0	888	888	888	888	888	888	888	1	888	88	88	88	88	22134.8	3 - Northern	4793608	23046.2
861	2	46	2	4	3	3	2	0	888	888	888	0	888	888	888	888	888	888	888	1	888	88	88	88	88	22134.8	3 - Northern	4793608	23046.2
862	2	45	2	3	4	3	2	0	888	888	888	0	888	888	888	888	888	888	888	1	888	88	88	88	88	22134.8	3 - Northern	4793608	23046.2
863	2	36	2	6	2	4	2	0	888	888	888	0	888	888	888	888	888	888	888	1	888	88	99	88	99	23892.3	3 - Northern	4793608	23046.2
864	2	32	2	6	2	4	2	0	888	888	888	0	888	888	888	888	888	888	888	1	888	99	88	99	88	23892.3	3 - Northern	4793608	23046.2
865	2	46	2	6	1	8	2	0	888	888	888	0	888	888	888	888	888	888	888	1	888	99	99	99	2	22134.8	3 - Northern	4793608	23046.2
866	2	46	2	6	2	5	2	0	888	888	888	0	888	888	888	888	888	888	888	1	888	1	99	99	88	22134.8	3 - Northern	4793608	23046.2
867	2	38	1	4	2	4	2	0	888	888	888	0	888	888	888	888	888	888	888	1	888	99	88	88	99	23892.3	3 - Northern	4793608	23046.2
868	2	55	2	2	4	5	2	0	888	888	888	0	888	888	888	888	888	888	888	1	888	88	88	99	99	22866.3	3 - Northern	4793608	23046.2
869	1	59	3	1	11	1	2	1	20	5	1	1	10	0	0	0	0	0	0	1	888	99	88	99	88	23346.2	3 - Northern	4793608	23046.2
870	1	39	2	4	5	6	2	1	19	1	4	0	888	888	888	888	888	888	888	1	888	88	88	88	99	23638.7	3 - Northern	4793608	23046.2
871	1	60	2	2	3	5	2	1	20	1	5	1	10	0	0	0	0	0	0	1	888	88	99	88	99	23346.2	3 - Northern	4793608	23046.2
872	2	64	4	2	3	5	2	1	63	2	5	1	10	0	0	0	0	0	0	1	888	88	88	88	88	22866.3	3 - Northern	4793608	23046.2
873	2	60	2	6	6	7	2	1	59	2	5	0	888	888	888	888	888	888	888	1	888	88	88	99	88	22866.3	3 - Northern	4793608	23046.2
874	2	50	2	3	4	8	2	1	49	2	5	8	10	0	0	0	0	0	0	1	888	99	88	88	99	22866.3	3 - Northern	4793608	23046.2
875	2	20	1	5	10	5	2	1	999	2	5	1	10	0	0	0	0	0	0	1	888	99	88	99	88	22843.1	3 - Northern	4793608	23046.2
876	1	28	1	3	2	4	2	1	17	1	1	0	888	888	888	888	888	888	888	3	4	88	1	1	88	23157.3	3 - Northern	4793608	23046.2
877	1	56	2	2	3	3	2	1	18	1	1	0	888	888	888	888	888	888	888	3	1	88	88	1	1	23346.2	3 - Northern	4793608	23046.2
878	2	66	4	2	3	2	2	1	45	3	5	0	888	888	888	888	888	888	888	1	888	88	88	88	88	22866.3	3 - Northern	4793608	23046.2
879	1	37	2	4	4	3	2	1	18	1	1	0	888	888	888	888	888	888	888	3	4	88	88	88	88	23638.7	3 - Northern	4793608	23046.2
880	1	35	2	4	4	4	2	1	16	1	1	0	888	888	888	888	888	888	888	3	3	88	88	88	88	23638.7	3 - Northern	4793608	23046.2
881	1	44	2	3	4	4	2	1	15	1	1	0	888	888	888	888	888	888	888	3	3	88	88	1	1	23745.8	3 - Northern	4793608	23046.2
882	2	39	2	6	2	4	2	1	39	2	5	1	10	0	0	0	0	0	0	1	888	99	88	99	99	23892.3	3 - Northern	4793608	23046.2
883	2	48	4	3	4	5	2	1	47	2	5	1	10	0	0	0	0	0	0	1	888	99	99	99	1	22134.8	3 - Northern	4793608	23046.2
884	2	65	2	2	3	4	2	1	59	2	5	8	10	0	0	0	0	0	0	1	888	99	88	1	99	22866.3	3 - Northern	4793608	23046.2
885	1	30	2	4	2	6	2	1	19	5	2	0	888	888	888	888	888	888	888	1	888	99	88	88	88	23638.7	3 - Northern	4793608	23046.2
886	1	35	2	3	2	4	2	1	19	1	1	0	888	888	888	888	888	888	888	3	3	88	88	88	88	23638.7	3 - Northern	4793608	23046.2
887	2	35	2	4	5	3	2	1	17	5	5	0	888	888	888	888	888	888	888	1	888	88	88	88	88	23892.3	3 - Northern	4793608	23046.2
888	1	50	2	3	4	5	2	0	888	888	888	0	888	888	888	888	888	888	888	3	3	88	88	88	88	23346.2	3 - Northern	4793608	23046.2
889	1	65	2	4	4	3	2	0	888	888	888	0	888	888	888	888	888	888	888	1	888	88	88	88	88	23346.2	3 - Northern	4793608	23046.2
890	1	42	2	2	2	2	2	0	888	888	888	0	888	888	888	888	888	888	888	3	4	99	88	99	99	23745.8	3 - Northern	4793608	23046.2
891	1	26	1	6	2	4	2	0	888	888	888	0	888	888	888	888	888	888	888	3	3	88	88	88	88	23157.3	3 - Northern	4793608	23046.2
892	1	47	2	3	4	3	2	0	888	888	888	0	888	888	888	888	888	888	888	3	3	88	88	88	88	23745.8	3 - Northern	4793608	23046.2
893	1	57	4	1	6	1	2	0	888	888	888	0	888	888	888	888	888	888	888	1	888	88	88	88	88	23346.2	3 - Northern	4793608	23046.2
894	1	61	2	2	11	1	2	0	888	888	888	0	888	888	888	888	888	888	888	1	888	88	88	99	99	23346.2	3 - Northern	4793608	23046.2
895	1	43	2	3	11	1	2	0	888	888	888	0	888	888	888	888	888	888	888	1	888	88	88	88	88	23745.8	3 - Northern	4793608	23046.2
896	1	51	2	4	5	2	2	0	888	888	888	0	888	888	888	888	888	888	888	1	888	99	99	99	99	23346.2	3 - Northern	4793608	23046.2
897	1	25	1	4	2	4	2	0	888	888	888	0	888	888	888	888	888	888	888	1	888	88	88	88	88	23157.3	3 - Northern	4793608	23046.2
898	1	46	2	6	1	7	2	0	888	888	888	0	888	888	888	888	888	888	888	1	888	88	88	88	88	23745.8	3 - Northern	4793608	23046.2
899	1	50	1	5	5	6	2	0	888	888	888	0	888	888	888	888	888	888	888	1	888	88	88	99	88	23346.2	3 - Northern	4793608	23046.2
900	1	60	1	4	2	4	2	0	888	888	888	0	888	888	888	888	888	888	888	1	888	88	99	88	88	23346.2	3 - Northern	4793608	23046.2
901	2	47	2	2	5	5	2	0	888	888	888	0	888	888	888	888	888	888	888	1	888	88	88	88	88	22134.8	3 - Northern	4793608	23046.2
902	2	58	2	4	2	5	2	0	888	888	888	0	888	888	888	888	888	888	888	1	888	88	99	88	88	22866.3	3 - Northern	4793608	23046.2
903	2	44	2	4	4	4	2	0	888	888	888	0	888	888	888	888	888	888	888	1	888	88	99	99	99	22134.8	3 - Northern	4793608	23046.2
904	2	38	2	3	2	3	3	0	888	888	888	0	888	888	888	888	888	888	888	1	888	88	88	88	88	23892.3	3 - Northern	4793608	23046.2
905	2	22	1	2	10	1	2	0	888	888	888	0	888	888	888	888	888	888	888	1	888	88	88	88	88	22843.1	3 - Northern	4793608	23046.2
906	2	63	2	2	3	3	2	0	888	888	888	0	888	888	888	888	888	888	888	1	888	99	99	99	99	22866.3	3 - Northern	4793608	23046.2
907	2	67	2	2	6	1	2	0	888	888	888	0	888	888	888	888	888	888	888	1	888	88	88	88	88	22866.3	3 - Northern	4793608	23046.2
908	2	51	2	3	4	5	2	0	888	888	888	0	888	888	888	888	888	888	888	1	888	88	88	88	88	22866.3	3 - Northern	4793608	23046.2
909	1	20	1	2	10	1	2	0	888	888	888	0	888	888	888	888	888	888	888	3	4	88	88	88	88	23157.3	3 - Northern	4793608	23046.2
910	1	31	1	3	2	3	2	0	888	888	888	0	888	888	888	888	888	888	888	3	4	88	88	88	88	23638.7	3 - Northern	4793608	23046.2
911	1	34	1	6	2	4	2	0	888	888	888	0	888	888	888	888	888	888	888	3	3	88	88	88	88	23638.7	3 - Northern	4793608	23046.2
912	1	43	2	3	4	4	2	0	888	888	888	0	888	888	888	888	888	888	888	1	888	88	88	88	88	23745.8	3 - Northern	4793608	23046.2
913	1	65	2	3	5	3	2	0	888	888	888	0	888	888	888	888	888	888	888	1	888	88	88	88	88	23346.2	3 - Northern	4793608	23046.2
914	1	61	2	2	3	5	2	0	888	888	888	0	888	888	888	888	888	888	888	1	888	88	99	99	88	23346.2	3 - Northern	4793608	23046.2
915	1	59	2	4	4	4	99	0	888	888	888	0	888	888	888	888	888	888	888	1	888	88	88	88	88	23346.2	3 - Northern	4793608	23046.2
916	1	52	2	3	3	3	99	0	888	888	888	0	888	888	888	888	888	888	888	1	888	88	88	88	88	23346.2	3 - Northern	4793608	23046.2
917	1	55	2	2	4	3	2	0	888	888	888	0	888	888	888	888	888	888	888	1	888	88	88	88	88	23346.2	3 - Northern	4793608	23046.2
918	1	51	4	1	6	6	2	0	888	888	888	0	888	888	888	888	888	888	888	1	888	99	99	88	99	23346.2	3 - Northern	4793608	23046.2
919	1	51	2	4	6	6	2	0	888	888	888	0	888	888	888	888	888	888	888	3	2	99	88	99	88	23346.2	3 - Northern	4793608	23046.2
920	1	35	2	2	5	3	2	0	888	888	888	0	888	888	888	888	888	888	888	1	888	88	88	88	88	23638.7	3 - Northern	4793608	23046.2
921	1	40	2	4	3	6	2	0	888	888	888	0	888	888	888	888	888	888	888	1	888	88	88	88	88	23745.8	3 - Northern	4793608	23046.2
922	1	48	2	4	3	6	2	0	888	888	888	0	888	888	888	888	888	888	888	1	888	88	88	88	88	23745.8	3 - Northern	4793608	23046.2
923	1	52	2	4	7	6	2	0	888	888	888	0	888	888	888	888	888	888	888	1	888	88	99	88	99	23346.2	3 - Northern	4793608	23046.2
924	1	57	2	3	3	5	2	0	888	888	888	0	888	888	888	888	888	888	888	3	1	88	88	88	88	23346.2	3 - Northern	4793608	23046.2
925	2	30	99	6	9	6	2	0	888	888	888	0	888	888	888	888	888	888	888	1	888	99	88	88	88	23892.3	3 - Northern	4793608	23046.2
926	2	20	1	5	10	1	2	0	888	888	888	0	888	888	888	888	888	888	888	3	4	99	99	99	88	22843.1	3 - Northern	4793608	23046.2
927	2	42	2	1	6	3	2	0	888	888	888	0	888	888	888	888	888	888	888	3	2	88	99	88	88	22134.8	3 - Northern	4793608	23046.2
928	2	25	1	6	4	6	2	0	888	888	888	0	888	888	888	888	888	888	888	1	888	88	88	88	88	22843.1	3 - Northern	4793608	23046.2
929	2	49	2	4	1	5	2	0	888	888	888	0	888	888	888	888	888	888	888	1	888	88	99	88	88	22134.8	3 - Northern	4793608	23046.2
930	2	44	2	6	2	6	2	0	888	888	888	0	888	888	888	888	888	888	888	1	888	88	88	88	88	22134.8	3 - Northern	4793608	23046.2
931	2	26	1	4	3	3	2	0	888	888	888	0	888	888	888	888	888	888	888	1	888	88	88	88	88	22843.1	3 - Northern	4793608	23046.2
932	2	32	2	3	4	4	2	0	888	888	888	0	888	888	888	888	888	888	888	1	888	88	88	88	88	23892.3	3 - Northern	4793608	23046.2
933	2	35	2	3	4	5	2	0	888	888	888	0	888	888	888	888	888	888	888	1	888	88	88	88	88	23892.3	3 - Northern	4793608	23046.2
934	2	42	2	3	4	4	99	0	888	888	888	0	888	888	888	888	888	888	888	1	888	88	88	88	88	22134.8	3 - Northern	4793608	23046.2
935	2	41	2	2	3	3	2	0	888	888	888	0	888	888	888	888	888	888	888	1	888	88	88	88	88	22134.8	3 - Northern	4793608	23046.2
936	2	51	2	3	3	3	2	0	888	888	888	0	888	888	888	888	888	888	888	1	888	88	88	88	88	22866.3	3 - Northern	4793608	23046.2
937	2	65	2	3	5	4	2	0	888	888	888	0	888	888	888	888	888	888	888	1	888	88	88	88	88	22866.3	3 - Northern	4793608	23046.2
938	2	60	2	2	5	2	2	0	888	888	888	0	888	888	888	888	888	888	888	1	888	99	99	99	99	22866.3	3 - Northern	4793608	23046.2
939	2	58	2	2	5	3	2	0	888	888	888	0	888	888	888	888	888	888	888	1	888	99	99	99	99	22866.3	3 - Northern	4793608	23046.2
940	2	57	2	3	3	3	2	0	888	888	888	0	888	888	888	888	888	888	888	1	888	99	99	99	99	22866.3	3 - Northern	4793608	23046.2
941	2	62	2	2	3	3	2	0	888	888	888	0	888	888	888	888	888	888	888	1	888	99	99	99	99	22866.3	3 - Northern	4793608	23046.2
942	2	51	4	3	3	4	2	0	888	888	888	0	888	888	888	888	888	888	888	1	888	99	99	88	88	22866.3	3 - Northern	4793608	23046.2
943	2	29	1	6	2	4	2	0	888	888	888	0	888	888	888	888	888	888	888	1	888	99	88	88	88	22843.1	3 - Northern	4793608	23046.2
944	1	37	2	4	2	5	2	1	18	5	2	0	888	888	888	888	888	888	888	1	888	88	88	88	88	23638.7	3 - Northern	4793608	23046.2
945	1	60	2	4	6	6	2	1	16	1	2	1	1	0	0	0	0	0	2	1	888	99	99	88	88	23346.2	3 - Northern	4793608	23046.2
946	1	48	2	2	5	2	2	1	18	1	5	0	888	888	888	888	888	888	888	3	3	88	88	1	1	23745.8	3 - Northern	4793608	23046.2
947	1	62	2	2	5	3	99	1	16	1	1	0	888	888	888	888	888	888	888	3	4	88	88	88	88	23346.2	3 - Northern	4793608	23046.2
948	1	30	1	6	2	4	2	1	999	1	1	4	10	0	0	0	0	0	0	1	888	99	99	1	2	23638.7	3 - Northern	4793608	23046.2
949	2	43	2	2	3	3	2	0	888	888	888	0	888	888	888	888	888	888	888	1	888	88	88	88	88	22134.8	3 - Northern	4793608	23046.2
950	2	46	2	3	4	4	2	0	888	888	888	0	888	888	888	888	888	888	888	1	888	88	88	88	88	22134.8	3 - Northern	4793608	23046.2
951	2	43	2	2	3	6	2	1	20	1	5	2	1	1	0	0	0	0	0	1	888	88	99	88	99	22134.8	3 - Northern	4793608	23046.2
952	1	70	4	2	6	4	2	0	888	888	888	0	888	888	888	888	888	888	888	3	1	88	88	88	88	23346.2	2 - Central and Eastern	12188254	23260
953	1	62	3	2	3	3	2	0	888	888	888	0	888	888	888	888	888	888	888	1	888	88	88	88	88	23346.2	2 - Central and Eastern	12188254	23260
954	1	40	2	3	2	4	2	0	888	888	888	0	888	888	888	888	888	888	888	1	888	99	99	88	88	23745.8	2 - Central and Eastern	12188254	23260
955	1	46	2	6	1	5	2	0	888	888	888	0	888	888	888	888	888	888	888	3	4	99	99	99	99	23745.8	2 - Central and Eastern	12188254	23260
956	1	20	1	5	10	1	2	0	888	888	888	0	888	888	888	888	888	888	888	1	888	99	99	88	88	23157.3	2 - Central and Eastern	12188254	23260
957	1	27	1	5	2	4	2	0	888	888	888	0	888	888	888	888	888	888	888	3	4	99	99	99	99	23157.3	2 - Central and Eastern	12188254	23260
958	1	20	1	5	10	2	2	0	888	888	888	0	888	888	888	888	888	888	888	1	888	99	99	99	99	23157.3	2 - Central and Eastern	12188254	23260
959	2	61	3	2	3	5	2	0	888	888	888	0	888	888	888	888	888	888	888	1	888	88	88	88	88	22866.3	2 - Central and Eastern	12188254	23260
960	2	61	3	1	3	3	2	0	888	888	888	0	888	888	888	888	888	888	888	1	888	88	88	88	88	22866.3	2 - Central and Eastern	12188254	23260
961	2	62	4	1	6	1	2	0	888	888	888	0	888	888	888	888	888	888	888	1	888	88	88	88	88	22866.3	2 - Central and Eastern	12188254	23260
962	2	70	4	1	6	1	2	0	888	888	888	0	888	888	888	888	888	888	888	1	888	88	88	88	88	22866.3	2 - Central and Eastern	12188254	23260
963	2	60	3	2	3	3	2	0	888	888	888	0	888	888	888	888	888	888	888	1	888	99	99	99	99	22866.3	2 - Central and Eastern	12188254	23260
964	2	66	2	1	3	2	2	0	888	888	888	0	888	888	888	888	888	888	888	1	888	88	88	88	1	22866.3	2 - Central and Eastern	12188254	23260
965	2	46	2	4	2	4	2	0	888	888	888	0	888	888	888	888	888	888	888	1	888	88	88	88	88	22134.8	2 - Central and Eastern	12188254	23260
966	2	48	2	2	3	5	2	0	888	888	888	0	888	888	888	888	888	888	888	1	888	88	88	88	88	22134.8	2 - Central and Eastern	12188254	23260
967	2	33	2	6	1	4	2	0	888	888	888	0	888	888	888	888	888	888	888	1	888	88	88	88	88	23892.3	2 - Central and Eastern	12188254	23260
968	2	27	2	4	3	3	2	0	888	888	888	0	888	888	888	888	888	888	888	1	888	88	88	88	88	22843.1	2 - Central and Eastern	12188254	23260
969	1	52	4	2	5	2	2	1	25	4	5	0	888	888	888	888	888	888	888	3	4	88	1	1	1	23346.2	2 - Central and Eastern	12188254	23260
970	1	57	2	4	4	5	2	1	32	3	5	1	10	0	0	0	0	0	0	3	1	88	88	88	1	23346.2	2 - Central and Eastern	12188254	23260
971	1	65	4	1	5	3	2	1	30	4	5	0	888	888	888	888	888	888	888	3	4	88	88	1	2	23346.2	2 - Central and Eastern	12188254	23260
972	1	64	4	2	3	6	2	1	888	1	5	9	10	0	0	0	0	0	0	3	3	99	99	99	99	23346.2	2 - Central and Eastern	12188254	23260
973	1	65	3	2	3	2	2	1	888	4	5	1	10	0	0	0	0	0	0	3	1	88	88	88	88	23346.2	2 - Central and Eastern	12188254	23260
974	1	60	2	2	3	5	2	1	888	2	6	6	10	0	0	0	0	0	0	3	3	88	88	88	1	23346.2	2 - Central and Eastern	12188254	23260
975	1	49	2	2	5	3	2	1	888	4	5	0	888	888	888	888	888	888	888	3	1	1	1	1	1	23745.8	2 - Central and Eastern	12188254	23260
976	1	44	2	3	2	3	2	1	20	4	5	1	10	0	0	0	0	0	0	3	1	99	99	1	1	23745.8	2 - Central and Eastern	12188254	23260
977	1	30	2	2	2	5	2	1	888	4	5	0	888	888	888	888	888	888	888	3	4	1	1	2	2	23638.7	2 - Central and Eastern	12188254	23260
978	1	38	3	2	5	6	2	1	888	1	5	4	10	0	0	0	0	0	0	1	888	1	1	1	2	23638.7	2 - Central and Eastern	12188254	23260
979	1	38	2	2	3	4	2	1	25	4	5	0	888	888	888	888	888	888	888	3	4	88	88	88	1	23638.7	2 - Central and Eastern	12188254	23260
980	1	29	1	6	2	5	2	1	888	3	5	5	10	0	0	0	0	0	0	1	888	1	1	1	2	23157.3	2 - Central and Eastern	12188254	23260
981	2	55	2	2	3	5	2	1	45	1	5	1	10	0	0	0	0	0	0	1	888	88	88	88	88	22866.3	2 - Central and Eastern	12188254	23260
982	2	56	2	3	4	6	2	1	40	2	5	1	10	0	0	0	0	0	0	1	888	88	88	1	1	22866.3	2 - Central and Eastern	12188254	23260
983	2	52	3	2	3	3	2	1	888	3	5	0	888	888	888	888	888	888	888	1	888	88	88	88	88	22866.3	2 - Central and Eastern	12188254	23260
984	2	58	2	2	5	2	2	1	888	2	9	0	888	888	888	888	888	888	888	1	888	99	99	99	99	22866.3	2 - Central and Eastern	12188254	23260
985	2	46	3	6	2	6	2	1	888	4	5	0	888	888	888	888	888	888	888	1	888	99	99	99	99	22134.8	2 - Central and Eastern	12188254	23260
986	2	48	3	2	3	3	2	1	888	2	9	0	888	888	888	888	888	888	888	1	888	88	88	88	88	22134.8	2 - Central and Eastern	12188254	23260
987	2	38	2	6	2	4	2	1	36	1	5	1	10	0	0	0	0	0	0	1	888	88	88	88	88	23892.3	2 - Central and Eastern	12188254	23260
988	2	30	2	6	2	6	2	1	30	4	8	0	888	888	888	888	888	888	888	1	888	1	1	1	1	23892.3	2 - Central and Eastern	12188254	23260
989	2	28	3	6	3	6	2	1	27	4	5	0	888	888	888	888	888	888	888	1	888	88	88	88	88	22843.1	2 - Central and Eastern	12188254	23260
990	2	25	1	4	4	5	2	1	24	1	5	2	10	0	0	0	0	0	0	1	888	88	88	88	88	22843.1	2 - Central and Eastern	12188254	23260
991	1	76	4	1	6	1	2	0	888	888	888	0	888	888	888	888	888	888	888	3	1	99	99	99	99	23346.2	2 - Central and Eastern	12188254	23260
992	1	54	4	2	4	5	2	0	888	888	888	0	888	888	888	888	888	888	888	3	1	99	99	99	99	23346.2	2 - Central and Eastern	12188254	23260
993	1	56	2	2	5	3	2	0	888	888	888	0	888	888	888	888	888	888	888	3	4	99	99	99	99	23346.2	2 - Central and Eastern	12188254	23260
994	1	52	2	4	4	5	2	0	888	888	888	0	888	888	888	888	888	888	888	3	4	99	99	99	99	23346.2	2 - Central and Eastern	12188254	23260
995	1	68	4	1	5	3	2	0	888	888	888	0	888	888	888	888	888	888	888	3	4	99	99	99	99	23346.2	2 - Central and Eastern	12188254	23260
996	1	51	2	6	1	7	2	0	888	888	888	0	888	888	888	888	888	888	888	3	1	88	88	88	88	23346.2	2 - Central and Eastern	12188254	23260
997	1	60	4	2	4	9	2	0	888	888	888	0	888	888	888	888	888	888	888	1	888	88	88	88	88	23346.2	2 - Central and Eastern	12188254	23260
998	1	58	2	2	4	8	2	0	888	888	888	0	888	888	888	888	888	888	888	3	1	88	88	88	88	23346.2	2 - Central and Eastern	12188254	23260
999	1	41	2	6	1	5	2	0	888	888	888	0	888	888	888	888	888	888	888	3	1	99	99	99	99	23745.8	2 - Central and Eastern	12188254	23260
1000	1	44	2	4	3	5	2	0	888	888	888	0	888	888	888	888	888	888	888	3	4	99	99	99	99	23745.8	2 - Central and Eastern	12188254	23260
1001	1	40	2	6	4	6	2	0	888	888	888	0	888	888	888	888	888	888	888	3	4	99	99	99	99	23745.8	2 - Central and Eastern	12188254	23260
1002	1	49	2	2	3	5	2	0	888	888	888	0	888	888	888	888	888	888	888	3	4	99	99	99	99	23745.8	2 - Central and Eastern	12188254	23260
1003	1	48	3	1	5	4	2	0	888	888	888	0	888	888	888	888	888	888	888	1	888	88	88	88	88	23745.8	2 - Central and Eastern	12188254	23260
1004	1	32	2	4	4	5	2	0	888	888	888	0	888	888	888	888	888	888	888	3	1	99	99	99	99	23638.7	2 - Central and Eastern	12188254	23260
1005	1	35	2	6	4	7	2	0	888	888	888	0	888	888	888	888	888	888	888	3	1	88	1	1	1	23638.7	2 - Central and Eastern	12188254	23260
1006	1	34	3	6	2	5	2	0	888	888	888	0	888	888	888	888	888	888	888	2	1	88	88	88	88	23638.7	2 - Central and Eastern	12188254	23260
1007	1	20	1	5	10	99	2	0	888	888	888	0	888	888	888	888	888	888	888	1	888	88	88	88	88	23157.3	2 - Central and Eastern	12188254	23260
1008	1	20	1	2	10	2	2	0	888	888	888	0	888	888	888	888	888	888	888	1	888	99	99	99	99	23157.3	2 - Central and Eastern	12188254	23260
1009	1	25	3	2	3	4	2	0	888	888	888	0	888	888	888	888	888	888	888	3	3	88	88	88	88	23157.3	2 - Central and Eastern	12188254	23260
1010	2	68	4	1	6	1	2	0	888	888	888	0	888	888	888	888	888	888	888	1	888	99	99	99	99	22866.3	2 - Central and Eastern	12188254	23260
1011	2	57	4	2	5	3	2	0	888	888	888	0	888	888	888	888	888	888	888	1	888	99	99	99	99	22866.3	2 - Central and Eastern	12188254	23260
1012	2	74	4	1	6	1	2	0	888	888	888	0	888	888	888	888	888	888	888	1	888	99	99	99	99	22866.3	2 - Central and Eastern	12188254	23260
1013	2	56	2	2	5	3	2	0	888	888	888	0	888	888	888	888	888	888	888	1	888	99	99	99	99	22866.3	2 - Central and Eastern	12188254	23260
1014	2	60	4	1	6	1	2	0	888	888	888	0	888	888	888	888	888	888	888	1	888	99	99	99	99	22866.3	2 - Central and Eastern	12188254	23260
1015	2	55	2	2	4	4	2	0	888	888	888	0	888	888	888	888	888	888	888	1	888	99	99	99	99	22866.3	2 - Central and Eastern	12188254	23260
1016	2	50	2	2	5	3	2	0	888	888	888	0	888	888	888	888	888	888	888	1	888	99	99	99	99	22866.3	2 - Central and Eastern	12188254	23260
1017	2	57	2	3	2	4	2	0	888	888	888	0	888	888	888	888	888	888	888	1	888	99	99	99	99	22866.3	2 - Central and Eastern	12188254	23260
1018	2	66	1	6	1	1	2	0	888	888	888	0	888	888	888	888	888	888	888	1	888	99	99	99	99	22866.3	2 - Central and Eastern	12188254	23260
1019	2	66	2	2	3	5	2	0	888	888	888	0	888	888	888	888	888	888	888	1	888	88	88	88	88	22866.3	2 - Central and Eastern	12188254	23260
1020	2	61	1	1	5	2	2	0	888	888	888	0	888	888	888	888	888	888	888	1	888	88	88	88	88	22866.3	2 - Central and Eastern	12188254	23260
1021	2	69	4	1	6	99	2	0	888	888	888	0	888	888	888	888	888	888	888	1	888	88	88	88	88	22866.3	2 - Central and Eastern	12188254	23260
1022	2	56	3	1	9	3	2	0	888	888	888	0	888	888	888	888	888	888	888	1	888	1	1	1	1	22866.3	2 - Central and Eastern	12188254	23260
1023	2	60	1	1	3	5	2	0	888	888	888	0	888	888	888	888	888	888	888	1	888	88	88	88	88	22866.3	2 - Central and Eastern	12188254	23260
1024	2	56	1	6	1	11	2	0	888	888	888	0	888	888	888	888	888	888	888	1	888	88	88	88	88	22866.3	2 - Central and Eastern	12188254	23260
1025	2	66	4	1	3	8	2	0	888	888	888	0	888	888	888	888	888	888	888	1	888	88	88	88	88	22866.3	2 - Central and Eastern	12188254	23260
1026	2	53	4	2	5	3	2	0	888	888	888	0	888	888	888	888	888	888	888	1	888	88	88	88	88	22866.3	2 - Central and Eastern	12188254	23260
1027	2	40	3	3	2	5	2	0	888	888	888	0	888	888	888	888	888	888	888	1	888	88	88	88	88	22134.8	2 - Central and Eastern	12188254	23260
1028	2	40	3	2	3	6	2	0	888	888	888	0	888	888	888	888	888	888	888	1	888	99	99	99	99	22134.8	2 - Central and Eastern	12188254	23260
1029	2	45	2	1	6	99	2	0	888	888	888	0	888	888	888	888	888	888	888	1	888	99	99	99	99	22134.8	2 - Central and Eastern	12188254	23260
1030	2	42	2	2	3	4	2	0	888	888	888	0	888	888	888	888	888	888	888	1	888	99	99	99	99	22134.8	2 - Central and Eastern	12188254	23260
1031	2	44	2	6	1	5	2	0	888	888	888	0	888	888	888	888	888	888	888	1	888	88	88	88	88	22134.8	2 - Central and Eastern	12188254	23260
1032	2	45	2	2	5	3	2	0	888	888	888	0	888	888	888	888	888	888	888	1	888	99	99	99	99	22134.8	2 - Central and Eastern	12188254	23260
1033	2	39	2	4	2	4	2	0	888	888	888	0	888	888	888	888	888	888	888	1	888	99	99	99	99	23892.3	2 - Central and Eastern	12188254	23260
1034	2	36	2	4	2	4	2	0	888	888	888	0	888	888	888	888	888	888	888	1	888	88	88	88	88	23892.3	2 - Central and Eastern	12188254	23260
1035	2	37	2	4	3	5	2	0	888	888	888	0	888	888	888	888	888	888	888	1	888	99	99	99	99	23892.3	2 - Central and Eastern	12188254	23260
1036	2	33	2	2	5	3	2	0	888	888	888	0	888	888	888	888	888	888	888	1	888	99	99	99	99	23892.3	2 - Central and Eastern	12188254	23260
1037	2	30	1	6	3	6	2	0	888	888	888	0	888	888	888	888	888	888	888	1	888	99	99	99	99	23892.3	2 - Central and Eastern	12188254	23260
1038	2	30	2	2	3	6	2	0	888	888	888	0	888	888	888	888	888	888	888	1	888	88	88	88	88	23892.3	2 - Central and Eastern	12188254	23260
1039	2	39	3	2	5	3	2	0	888	888	888	0	888	888	888	888	888	888	888	1	888	99	99	99	99	23892.3	2 - Central and Eastern	12188254	23260
1040	2	26	2	4	2	3	2	0	888	888	888	0	888	888	888	888	888	888	888	1	888	88	88	88	1	22843.1	2 - Central and Eastern	12188254	23260
1041	2	29	3	4	5	6	2	0	888	888	888	0	888	888	888	888	888	888	888	1	888	99	99	99	99	22843.1	2 - Central and Eastern	12188254	23260
1042	2	22	1	2	10	2	2	0	888	888	888	0	888	888	888	888	888	888	888	1	888	99	99	99	99	22843.1	2 - Central and Eastern	12188254	23260
1043	2	21	1	2	10	3	2	0	888	888	888	0	888	888	888	888	888	888	888	1	888	88	1	1	1	22843.1	2 - Central and Eastern	12188254	23260
1044	2	29	3	3	5	3	2	0	888	888	888	0	888	888	888	888	888	888	888	1	888	99	99	99	99	22843.1	2 - Central and Eastern	12188254	23260
1045	1	64	4	1	5	3	2	1	28	4	5	0	888	888	888	888	888	888	888	3	4	88	88	88	1	23346.2	2 - Central and Eastern	12188254	23260
1046	1	65	4	1	5	3	2	1	40	1	5	0	888	888	888	888	888	888	888	3	4	88	88	88	88	23346.2	2 - Central and Eastern	12188254	23260
1047	1	51	2	3	4	4	2	1	30	4	5	0	888	888	888	888	888	888	888	3	4	88	88	88	88	23346.2	2 - Central and Eastern	12188254	23260
1048	1	52	2	2	3	4	2	1	51	1	5	1	10	0	0	0	0	0	0	3	1	88	1	1	1	23346.2	2 - Central and Eastern	12188254	23260
1049	1	63	3	1	5	3	2	1	20	4	5	0	888	888	888	888	888	888	888	3	4	88	88	88	88	23346.2	2 - Central and Eastern	12188254	23260
1050	1	63	4	6	6	5	2	1	60	2	8	8	10	0	0	0	0	0	0	3	1	88	88	88	88	23346.2	2 - Central and Eastern	12188254	23260
1051	1	56	4	1	3	4	2	1	54	3	5	8	10	0	0	0	0	0	0	3	1	88	88	88	88	23346.2	2 - Central and Eastern	12188254	23260
1052	1	61	3	1	4	7	2	1	55	4	5	0	888	888	888	888	888	888	888	1	888	88	88	1	1	23346.2	2 - Central and Eastern	12188254	23260
1053	1	59	2	4	4	11	2	1	50	2	6	4	10	0	0	0	0	0	0	1	888	88	88	1	1	23346.2	2 - Central and Eastern	12188254	23260
1054	1	66	2	1	4	8	2	1	888	4	5	0	888	888	888	888	888	888	888	1	888	99	99	99	88	23346.2	2 - Central and Eastern	12188254	23260
1055	1	76	4	1	6	1	2	1	60	3	9	0	888	888	888	888	888	888	888	2	1	88	88	88	88	23346.2	2 - Central and Eastern	12188254	23260
1056	1	60	2	2	5	3	2	1	58	3	5	0	888	888	888	888	888	888	888	1	888	88	88	88	88	23346.2	2 - Central and Eastern	12188254	23260
1057	1	53	4	1	5	3	2	1	888	4	5	0	888	888	888	888	888	888	888	3	1	99	99	99	99	23346.2	2 - Central and Eastern	12188254	23260
1058	1	68	2	1	3	3	2	1	50	2	6	3	10	0	0	0	0	0	0	2	1	88	88	88	88	23346.2	2 - Central and Eastern	12188254	23260
1059	1	60	4	1	5	3	2	1	55	3	5	1	10	0	0	0	0	0	0	3	1	99	99	99	99	23346.2	2 - Central and Eastern	12188254	23260
1060	1	57	2	3	2	4	2	1	30	1	5	0	888	888	888	888	888	888	888	2	1	88	88	1	1	23346.2	2 - Central and Eastern	12188254	23260
1061	1	52	2	2	3	4	2	1	888	1	5	0	888	888	888	888	888	888	888	1	888	88	88	1	1	23346.2	2 - Central and Eastern	12188254	23260
1062	1	45	2	4	2	4	2	1	20	4	5	0	888	888	888	888	888	888	888	3	4	88	88	88	88	23745.8	2 - Central and Eastern	12188254	23260
1063	1	48	4	3	2	4	2	1	28	1	5	0	888	888	888	888	888	888	888	3	1	88	1	1	1	23745.8	2 - Central and Eastern	12188254	23260
1064	1	42	1	6	1	6	2	1	888	3	5	0	888	888	888	888	888	888	888	1	888	88	88	88	88	23745.8	2 - Central and Eastern	12188254	23260
1065	1	46	2	3	4	8	2	1	46	3	5	1	10	0	0	0	0	0	0	1	888	88	88	88	88	23745.8	2 - Central and Eastern	12188254	23260
1066	1	46	2	6	2	5	2	1	888	4	5	0	888	888	888	888	888	888	888	1	888	88	88	88	88	23745.8	2 - Central and Eastern	12188254	23260
1067	1	40	2	4	3	6	2	1	30	1	5	4	10	0	0	0	0	0	0	1	888	99	99	99	99	23745.8	2 - Central and Eastern	12188254	23260
1068	1	30	2	4	2	4	2	1	27	1	5	0	888	888	888	888	888	888	888	3	1	88	1	1	1	23638.7	2 - Central and Eastern	12188254	23260
1069	1	33	3	4	2	4	2	1	25	4	5	0	888	888	888	888	888	888	888	3	4	88	88	88	88	23638.7	2 - Central and Eastern	12188254	23260
1070	1	36	2	3	3	5	2	1	35	1	5	1	10	0	0	0	0	0	0	3	1	1	1	1	1	23638.7	2 - Central and Eastern	12188254	23260
1071	1	30	3	4	2	3	2	1	888	3	5	0	888	888	888	888	888	888	888	3	999	88	88	88	88	23638.7	2 - Central and Eastern	12188254	23260
1072	1	30	4	1	5	3	2	1	888	1	5	5	10	0	0	0	0	0	0	3	1	99	99	99	99	23638.7	2 - Central and Eastern	12188254	23260
1073	1	36	4	3	3	8	2	1	888	4	5	0	888	888	888	888	888	888	888	1	888	99	99	99	99	23638.7	2 - Central and Eastern	12188254	23260
1074	1	36	3	2	3	6	2	1	888	3	5	0	888	888	888	888	888	888	888	2	1	88	88	88	88	23638.7	2 - Central and Eastern	12188254	23260
1075	1	32	2	3	3	6	2	1	888	4	5	0	888	888	888	888	888	888	888	2	1	88	88	88	88	23638.7	2 - Central and Eastern	12188254	23260
1076	1	29	4	2	3	8	2	1	20	1	2	0	888	888	888	888	888	888	888	2	1	99	99	99	99	23157.3	2 - Central and Eastern	12188254	23260
1077	1	24	2	2	3	3	2	1	888	3	5	0	888	888	888	888	888	888	888	2	1	99	99	99	99	23157.3	2 - Central and Eastern	12188254	23260
1078	1	28	2	6	2	3	2	1	27	1	5	0	888	888	888	888	888	888	888	3	4	1	1	1	1	23157.3	2 - Central and Eastern	12188254	23260
1079	1	27	2	6	2	5	2	1	999	4	5	4	10	0	0	0	0	0	0	2	1	88	88	1	1	23157.3	2 - Central and Eastern	12188254	23260
1080	1	26	1	4	2	4	2	1	25	1	5	2	10	0	0	0	0	0	0	3	1	88	88	1	1	23157.3	2 - Central and Eastern	12188254	23260
1081	1	29	1	3	2	4	2	1	22	4	5	0	888	888	888	888	888	888	888	3	1	99	99	99	99	23157.3	2 - Central and Eastern	12188254	23260
1082	1	23	1	3	5	3	2	1	888	1	5	0	888	888	888	888	888	888	888	1	888	88	1	1	1	23157.3	2 - Central and Eastern	12188254	23260
1083	1	24	1	4	2	4	2	1	22	1	5	0	888	888	888	888	888	888	888	1	888	88	88	1	1	23157.3	2 - Central and Eastern	12188254	23260
1084	2	58	2	2	3	4	2	1	56	3	8	7	10	0	0	0	0	0	0	1	888	99	99	99	99	22866.3	2 - Central and Eastern	12188254	23260
1085	2	59	2	2	3	4	2	1	58	3	5	6	10	0	0	0	0	0	0	1	888	88	88	88	88	22866.3	2 - Central and Eastern	12188254	23260
1086	2	63	4	1	3	3	2	1	30	4	5	0	888	888	888	888	888	888	888	1	888	88	88	88	88	22866.3	2 - Central and Eastern	12188254	23260
1087	2	51	2	3	2	5	2	1	50	1	5	0	888	888	888	888	888	888	888	1	888	88	88	1	1	22866.3	2 - Central and Eastern	12188254	23260
1088	2	53	2	6	4	5	2	1	50	2	8	6	10	0	0	0	0	0	0	1	888	88	88	88	88	22866.3	2 - Central and Eastern	12188254	23260
1089	2	51	4	4	4	5	2	1	30	4	5	0	888	888	888	888	888	888	888	1	888	88	88	88	1	22866.3	2 - Central and Eastern	12188254	23260
1090	2	70	4	1	6	1	2	1	888	3	6	0	888	888	888	888	888	888	888	1	888	88	88	88	88	22866.3	2 - Central and Eastern	12188254	23260
1091	2	65	3	2	3	5	2	1	888	4	5	0	888	888	888	888	888	888	888	1	888	88	88	88	88	22866.3	2 - Central and Eastern	12188254	23260
1092	2	56	2	2	3	6	2	1	888	4	9	0	888	888	888	888	888	888	888	1	888	99	99	99	99	22866.3	2 - Central and Eastern	12188254	23260
1093	2	58	2	1	3	5	2	1	888	3	5	0	888	888	888	888	888	888	888	1	888	99	99	99	99	22866.3	2 - Central and Eastern	12188254	23260
1094	2	55	2	2	3	6	2	1	888	3	5	0	888	888	888	888	888	888	888	1	888	88	88	88	88	22866.3	2 - Central and Eastern	12188254	23260
1095	2	61	2	1	3	3	2	1	58	4	5	0	888	888	888	888	888	888	888	1	888	88	88	88	88	22866.3	2 - Central and Eastern	12188254	23260
1096	2	59	2	1	3	6	2	1	58	3	5	4	10	0	0	0	0	0	0	1	888	99	99	99	99	22866.3	2 - Central and Eastern	12188254	23260
1097	2	45	3	6	3	6	2	1	888	4	9	2	10	0	0	0	0	0	0	1	888	88	88	88	88	22134.8	2 - Central and Eastern	12188254	23260
1098	2	49	1	2	3	3	2	1	48	4	8	0	888	888	888	888	888	888	888	1	888	88	88	88	88	22134.8	2 - Central and Eastern	12188254	23260
1099	2	48	3	3	2	5	2	1	888	4	5	0	888	888	888	888	888	888	888	1	888	88	88	88	1	22134.8	2 - Central and Eastern	12188254	23260
1100	2	48	2	4	2	5	2	1	46	2	9	4	10	0	0	0	0	0	0	1	888	88	88	88	88	22134.8	2 - Central and Eastern	12188254	23260
1101	2	40	4	4	3	4	2	1	888	1	5	0	888	888	888	888	888	888	888	1	888	88	1	1	1	22134.8	2 - Central and Eastern	12188254	23260
1102	2	43	4	3	2	4	2	1	43	1	5	1	10	0	0	0	0	0	0	1	888	88	88	1	1	22134.8	2 - Central and Eastern	12188254	23260
1103	2	39	4	6	4	7	2	1	35	3	8	7	10	0	0	0	0	0	0	1	888	88	88	88	88	23892.3	2 - Central and Eastern	12188254	23260
1104	2	31	2	6	4	7	2	1	29	1	5	0	888	888	888	888	888	888	888	1	888	88	88	1	1	23892.3	2 - Central and Eastern	12188254	23260
1105	2	38	4	6	4	8	2	1	888	4	5	0	888	888	888	888	888	888	888	1	888	88	88	88	88	23892.3	2 - Central and Eastern	12188254	23260
1106	2	35	3	6	2	6	2	1	999	3	9	0	888	888	888	888	888	888	888	1	888	88	88	88	88	23892.3	2 - Central and Eastern	12188254	23260
1107	2	27	2	1	3	8	2	1	888	99	9	0	888	888	888	888	888	888	888	1	888	88	88	88	88	22843.1	2 - Central and Eastern	12188254	23260
1108	2	29	2	6	2	3	2	1	888	4	8	3	10	0	0	0	0	0	0	1	888	88	88	88	88	22843.1	2 - Central and Eastern	12188254	23260
1109	2	22	1	5	10	1	2	1	21	3	5	0	888	888	888	888	888	888	888	1	888	99	99	99	99	22843.1	2 - Central and Eastern	12188254	23260
1110	2	26	1	6	2	4	2	1	26	1	5	1	10	0	0	0	0	0	0	1	888	88	1	1	1	22843.1	2 - Central and Eastern	12188254	23260
1111	2	27	1	6	1	4	2	1	26	1	5	0	888	888	888	888	888	888	888	1	888	99	99	99	99	22843.1	2 - Central and Eastern	12188254	23260
1112	1	55	4	2	3	4	2	0	888	888	888	0	888	888	888	888	888	888	888	3	4	99	99	99	99	23346.2	2 - Central and Eastern	12188254	23260
1113	1	70	4	1	5	2	2	0	888	888	888	0	888	888	888	888	888	888	888	3	1	99	99	99	99	23346.2	2 - Central and Eastern	12188254	23260
1114	1	59	2	2	3	4	2	0	888	888	888	0	888	888	888	888	888	888	888	3	1	99	99	99	99	23346.2	2 - Central and Eastern	12188254	23260
1115	1	60	2	2	5	3	2	0	888	888	888	0	888	888	888	888	888	888	888	1	888	88	88	88	88	23346.2	2 - Central and Eastern	12188254	23260
1116	1	46	2	4	2	3	2	0	888	888	888	0	888	888	888	888	888	888	888	3	3	88	88	88	88	23745.8	2 - Central and Eastern	12188254	23260
1117	1	30	3	3	3	3	2	0	888	888	888	0	888	888	888	888	888	888	888	3	1	99	99	99	99	23638.7	2 - Central and Eastern	12188254	23260
1118	1	36	3	1	3	6	2	0	888	888	888	0	888	888	888	888	888	888	888	3	4	88	88	88	88	23638.7	2 - Central and Eastern	12188254	23260
1119	1	29	1	4	3	6	2	0	888	888	888	0	888	888	888	888	888	888	888	3	4	88	88	88	88	23157.3	2 - Central and Eastern	12188254	23260
1120	2	21	1	5	10	1	2	0	888	888	888	0	888	888	888	888	888	888	888	1	888	99	99	99	99	22843.1	2 - Central and Eastern	12188254	23260
1121	2	29	1	2	3	6	2	0	888	888	888	0	888	888	888	888	888	888	888	1	888	88	88	88	88	22843.1	2 - Central and Eastern	12188254	23260
1122	2	21	1	5	10	3	2	0	888	888	888	0	888	888	888	888	888	888	888	1	888	88	88	88	88	22843.1	2 - Central and Eastern	12188254	23260
1123	2	40	3	3	2	3	2	0	888	888	888	0	888	888	888	888	888	888	888	1	888	99	99	99	99	22134.8	2 - Central and Eastern	12188254	23260
1124	2	43	2	6	2	5	2	0	888	888	888	0	888	888	888	888	888	888	888	1	888	88	88	88	1	22134.8	2 - Central and Eastern	12188254	23260
1125	2	30	1	2	3	5	2	0	888	888	888	0	888	888	888	888	888	888	888	1	888	99	99	99	99	23892.3	2 - Central and Eastern	12188254	23260
1126	2	35	2	6	1	4	2	0	888	888	888	0	888	888	888	888	888	888	888	1	888	88	88	88	88	23892.3	2 - Central and Eastern	12188254	23260
1127	2	57	2	2	4	5	2	0	888	888	888	0	888	888	888	888	888	888	888	1	888	99	99	99	99	22866.3	2 - Central and Eastern	12188254	23260
1128	2	55	2	4	2	4	2	0	888	888	888	0	888	888	888	888	888	888	888	1	888	88	88	88	88	22866.3	2 - Central and Eastern	12188254	23260
1129	2	52	4	2	3	4	2	0	888	888	888	0	888	888	888	888	888	888	888	1	888	99	99	99	99	22866.3	2 - Central and Eastern	12188254	23260
1130	2	54	2	3	5	3	2	0	888	888	888	0	888	888	888	888	888	888	888	1	888	99	99	99	99	22866.3	2 - Central and Eastern	12188254	23260
1131	2	80	1	1	3	2	2	0	888	888	888	0	888	888	888	888	888	888	888	1	888	88	88	1	1	22866.3	2 - Central and Eastern	12188254	23260
1132	2	69	1	1	3	2	2	0	888	888	888	0	888	888	888	888	888	888	888	1	888	1	1	1	1	22866.3	2 - Central and Eastern	12188254	23260
1133	2	69	4	1	3	6	2	0	888	888	888	0	888	888	888	888	888	888	888	1	888	88	88	88	88	22866.3	2 - Central and Eastern	12188254	23260
1134	1	60	3	1	3	3	2	1	58	2	6	5	10	0	0	0	0	0	0	3	1	88	1	1	2	23346.2	2 - Central and Eastern	12188254	23260
1135	1	50	3	1	3	3	2	1	30	4	5	1	10	0	0	0	0	0	0	1	888	88	88	88	88	23346.2	2 - Central and Eastern	12188254	23260
1136	1	63	4	1	5	2	2	1	999	4	5	0	888	888	888	888	888	888	888	3	4	88	88	88	1	23346.2	2 - Central and Eastern	12188254	23260
1137	1	56	3	4	3	6	2	1	39	2	5	0	888	888	888	888	888	888	888	1	888	1	1	1	1	23346.2	2 - Central and Eastern	12188254	23260
1138	1	70	4	1	5	2	2	1	50	2	5	0	888	888	888	888	888	888	888	1	888	88	88	88	1	23346.2	2 - Central and Eastern	12188254	23260
1139	1	60	3	1	5	2	2	1	49	4	5	2	10	0	0	0	0	0	0	1	888	88	88	88	88	23346.2	2 - Central and Eastern	12188254	23260
1140	1	54	4	6	2	5	2	1	40	3	6	0	888	888	888	888	888	888	888	1	888	99	99	99	99	23346.2	2 - Central and Eastern	12188254	23260
1141	1	61	2	2	5	2	2	1	888	3	8	4	10	0	0	0	0	0	0	1	888	88	88	88	88	23346.2	2 - Central and Eastern	12188254	23260
1142	1	70	4	1	6	99	2	1	888	2	6	4	10	0	0	0	0	0	0	1	888	1	1	2	2	23346.2	2 - Central and Eastern	12188254	23260
1143	1	48	2	6	1	8	2	1	888	4	5	0	888	888	888	888	888	888	888	3	4	88	88	88	1	23745.8	2 - Central and Eastern	12188254	23260
1144	1	47	4	2	5	3	2	1	46	4	5	0	888	888	888	888	888	888	888	1	888	88	88	88	1	23745.8	2 - Central and Eastern	12188254	23260
1145	1	49	3	4	2	3	2	1	888	4	5	2	10	0	0	0	0	0	0	1	888	1	1	1	1	23745.8	2 - Central and Eastern	12188254	23260
1146	1	41	2	6	4	5	2	1	40	3	5	4	10	0	0	0	0	0	0	3	4	88	88	88	1	23745.8	2 - Central and Eastern	12188254	23260
1147	1	30	3	4	3	6	2	1	888	1	5	0	888	888	888	888	888	888	888	2	3	1	1	1	1	23638.7	2 - Central and Eastern	12188254	23260
1148	1	38	3	4	5	3	2	1	24	4	5	1	10	0	0	0	0	0	0	3	4	88	88	88	88	23638.7	2 - Central and Eastern	12188254	23260
1149	1	37	2	6	2	4	2	1	26	1	5	1	10	0	0	0	0	0	0	3	1	88	88	88	1	23638.7	2 - Central and Eastern	12188254	23260
1150	1	21	1	3	2	3	2	1	21	4	5	4	10	0	0	0	0	0	0	1	888	99	99	99	99	23157.3	2 - Central and Eastern	12188254	23260
1151	1	26	1	4	2	3	2	1	25	1	5	2	10	0	0	0	0	0	0	3	4	99	99	99	99	23157.3	2 - Central and Eastern	12188254	23260
1152	1	22	1	5	10	2	2	1	21	1	5	1	10	0	0	0	0	0	0	3	1	88	88	1	1	23157.3	2 - Central and Eastern	12188254	23260
1153	2	24	1	3	2	3	2	1	22	1	5	0	888	888	888	888	888	888	888	1	888	88	88	1	1	22843.1	2 - Central and Eastern	12188254	23260
1154	2	47	4	6	4	5	2	1	45	3	5	5	10	0	0	0	0	0	0	1	888	88	88	88	88	22134.8	2 - Central and Eastern	12188254	23260
1155	2	41	3	2	5	3	2	1	888	4	5	0	888	888	888	888	888	888	888	1	888	1	1	1	1	22134.8	2 - Central and Eastern	12188254	23260
1156	2	42	2	4	2	3	2	1	40	1	5	3	10	0	0	0	0	0	0	1	888	88	88	1	1	22134.8	2 - Central and Eastern	12188254	23260
1157	2	37	3	2	3	6	2	1	35	2	6	4	10	9	9	0	0	0	0	1	888	99	99	99	99	23892.3	2 - Central and Eastern	12188254	23260
1158	2	38	3	4	3	5	2	1	37	1	5	0	888	888	888	888	888	888	888	1	888	88	88	1	1	23892.3	2 - Central and Eastern	12188254	23260
1159	2	64	4	1	5	2	2	1	60	2	5	0	888	888	888	888	888	888	888	1	888	99	99	99	99	22866.3	2 - Central and Eastern	12188254	23260
1160	2	58	3	2	3	3	2	1	30	4	5	0	888	888	888	888	888	888	888	1	888	88	88	88	88	22866.3	2 - Central and Eastern	12188254	23260
1161	2	66	2	1	6	1	2	1	62	2	5	3	10	0	0	0	0	0	0	1	888	88	88	88	88	22866.3	2 - Central and Eastern	12188254	23260
1162	2	55	3	2	3	6	2	1	888	2	6	0	888	888	888	888	888	888	888	1	888	88	88	88	88	22866.3	2 - Central and Eastern	12188254	23260
1163	2	58	2	1	3	5	2	1	888	4	5	4	10	0	0	0	0	0	0	1	888	99	99	99	99	22866.3	2 - Central and Eastern	12188254	23260
1164	2	80	4	1	6	99	2	1	888	4	5	0	888	888	888	888	888	888	888	1	888	99	99	99	99	22866.3	2 - Central and Eastern	12188254	23260
1165	2	64	3	2	5	2	2	1	60	3	8	0	888	888	888	888	888	888	888	1	888	88	88	88	88	22866.3	2 - Central and Eastern	12188254	23260
1166	1	51	2	2	3	3	2	0	888	888	888	0	888	888	888	888	888	888	888	2	3	0	1	1	1	23346.2	5 - Northeastern	16965035	23400
1167	1	51	2	2	5	4	2	0	888	888	888	0	888	888	888	888	888	888	888	3	3	88	1	88	88	23346.2	5 - Northeastern	16965035	23400
1168	1	50	2	6	1	7	2	0	888	888	888	0	888	888	888	888	888	888	888	2	1	0	0	1	1	23346.2	5 - Northeastern	16965035	23400
1169	1	50	2	6	4	11	2	0	888	888	888	0	888	888	888	888	888	888	888	2	1	0	2	88	88	23346.2	5 - Northeastern	16965035	23400
1170	1	52	1	3	4	5	2	0	888	888	888	0	888	888	888	888	888	888	888	1	888	88	88	88	88	23346.2	5 - Northeastern	16965035	23400
1171	1	54	2	4	2	4	2	0	888	888	888	0	888	888	888	888	888	888	888	3	1	0	0	0	0	23346.2	5 - Northeastern	16965035	23400
1172	1	51	2	6	1	7	2	0	888	888	888	0	888	888	888	888	888	888	888	1	888	2	3	5	7	23346.2	5 - Northeastern	16965035	23400
1173	1	67	2	6	3	3	2	0	888	888	888	0	888	888	888	888	888	888	888	1	888	0	0	1	2	23346.2	5 - Northeastern	16965035	23400
1174	1	64	2	3	3	4	2	0	888	888	888	0	888	888	888	888	888	888	888	3	4	88	88	88	88	23346.2	5 - Northeastern	16965035	23400
1175	1	55	2	6	1	7	2	0	888	888	888	0	888	888	888	888	888	888	888	1	888	0	88	88	88	23346.2	5 - Northeastern	16965035	23400
1176	1	69	2	7	6	5	2	0	888	888	888	0	888	888	888	888	888	888	888	2	1	0	0	1	2	23346.2	5 - Northeastern	16965035	23400
1177	1	63	2	2	5	2	2	0	888	888	888	0	888	888	888	888	888	888	888	1	888	0	0	0	88	23346.2	5 - Northeastern	16965035	23400
1178	1	59	2	2	3	4	2	0	888	888	888	0	888	888	888	888	888	888	888	1	888	2	88	88	88	23346.2	5 - Northeastern	16965035	23400
1179	1	70	2	6	6	2	2	0	888	888	888	0	888	888	888	888	888	888	888	2	1	0	0	1	1	23346.2	5 - Northeastern	16965035	23400
1180	1	72	2	2	3	4	2	0	888	888	888	0	888	888	888	888	888	888	888	1	888	0	0	88	88	23346.2	5 - Northeastern	16965035	23400
1181	1	61	2	1	5	2	2	0	888	888	888	0	888	888	888	888	888	888	888	1	888	0	0	0	0	23346.2	5 - Northeastern	16965035	23400
1182	1	45	2	4	2	4	2	0	888	888	888	0	888	888	888	888	888	888	888	1	888	0	1	1	1	23745.8	5 - Northeastern	16965035	23400
1183	1	40	2	2	5	2	2	0	888	888	888	0	888	888	888	888	888	888	888	1	888	1	88	88	88	23745.8	5 - Northeastern	16965035	23400
1184	1	48	2	6	1	6	2	0	888	888	888	0	888	888	888	888	888	888	888	3	3	0	0	0	0	23745.8	5 - Northeastern	16965035	23400
1185	1	35	1	4	5	3	2	0	888	888	888	0	888	888	888	888	888	888	888	2	4	0	0	0	1	23638.7	5 - Northeastern	16965035	23400
1186	1	32	2	6	2	5	2	0	888	888	888	0	888	888	888	888	888	888	888	1	888	0	0	0	1	23638.7	5 - Northeastern	16965035	23400
1187	1	31	1	6	2	4	3	0	888	888	888	0	888	888	888	888	888	888	888	1	888	88	88	88	88	23638.7	5 - Northeastern	16965035	23400
1188	1	36	2	6	2	4	2	0	888	888	888	0	888	888	888	888	888	888	888	2	1	1	1	1	2	23638.7	5 - Northeastern	16965035	23400
1189	1	35	2	6	9	4	2	0	888	888	888	0	888	888	888	888	888	888	888	2	2	88	88	88	88	23638.7	5 - Northeastern	16965035	23400
1190	1	21	1	5	10	2	2	0	888	888	888	0	888	888	888	888	888	888	888	1	888	0	1	2	2	23157.3	5 - Northeastern	16965035	23400
1191	1	20	1	5	10	1	2	0	888	888	888	0	888	888	888	888	888	888	888	1	888	88	88	88	88	23157.3	5 - Northeastern	16965035	23400
1192	1	21	1	5	10	2	2	0	888	888	888	0	888	888	888	888	888	888	888	1	888	1	1	2	2	23157.3	5 - Northeastern	16965035	23400
1193	1	22	1	5	10	2	2	0	888	888	888	0	888	888	888	888	888	888	888	2	3	1	1	1	2	23157.3	5 - Northeastern	16965035	23400
1194	1	24	1	6	2	6	2	0	888	888	888	0	888	888	888	888	888	888	888	3	4	88	88	88	88	23157.3	5 - Northeastern	16965035	23400
1195	1	25	1	6	9	4	2	0	888	888	888	0	888	888	888	888	888	888	888	1	888	0	1	1	1	23157.3	5 - Northeastern	16965035	23400
1196	1	22	1	5	10	1	2	0	888	888	888	0	888	888	888	888	888	888	888	2	4	2	3	5	6	23157.3	5 - Northeastern	16965035	23400
1197	1	28	1	7	1	5	2	0	888	888	888	0	888	888	888	888	888	888	888	2	1	0	0	1	1	23157.3	5 - Northeastern	16965035	23400
1198	2	65	2	4	4	4	2	0	888	888	888	0	888	888	888	888	888	888	888	2	1	0	0	0	1	22866.3	5 - Northeastern	16965035	23400
1199	2	67	2	4	6	3	2	0	888	888	888	0	888	888	888	888	888	888	888	1	888	0	0	1	1	22866.3	5 - Northeastern	16965035	23400
1200	2	60	2	2	3	3	2	0	888	888	888	0	888	888	888	888	888	888	888	1	888	88	88	88	88	22866.3	5 - Northeastern	16965035	23400
1201	2	72	2	7	6	5	2	0	888	888	888	0	888	888	888	888	888	888	888	1	888	0	1	1	1	22866.3	5 - Northeastern	16965035	23400
1202	2	71	2	2	6	2	2	0	888	888	888	0	888	888	888	888	888	888	888	1	888	0	0	1	1	22866.3	5 - Northeastern	16965035	23400
1203	2	50	2	2	3	4	2	0	888	888	888	0	888	888	888	888	888	888	888	1	888	0	0	0	1	22866.3	5 - Northeastern	16965035	23400
1204	2	50	2	2	4	5	2	0	888	888	888	0	888	888	888	888	888	888	888	1	888	88	2	88	88	22866.3	5 - Northeastern	16965035	23400
1205	2	51	2	4	4	6	2	0	888	888	888	0	888	888	888	888	888	888	888	1	888	1	1	2	2	22866.3	5 - Northeastern	16965035	23400
1206	2	50	2	2	7	2	2	0	888	888	888	0	888	888	888	888	888	888	888	1	888	88	88	88	88	22866.3	5 - Northeastern	16965035	23400
1207	2	52	2	7	1	8	2	0	888	888	888	0	888	888	888	888	888	888	888	2	1	0	1	2	2	22866.3	5 - Northeastern	16965035	23400
1208	2	52	2	3	3	3	2	0	888	888	888	0	888	888	888	888	888	888	888	1	888	88	88	88	2	22866.3	5 - Northeastern	16965035	23400
1209	2	55	2	6	1	6	2	0	888	888	888	0	888	888	888	888	888	888	888	1	888	0	0	0	1	22866.3	5 - Northeastern	16965035	23400
1210	2	51	2	6	2	7	2	0	888	888	888	0	888	888	888	888	888	888	888	1	888	88	88	88	88	22866.3	5 - Northeastern	16965035	23400
1211	2	53	2	6	1	7	3	0	888	888	888	0	888	888	888	888	888	888	888	2	1	0	1	1	1	22866.3	5 - Northeastern	16965035	23400
1212	2	56	2	4	4	5	2	0	888	888	888	0	888	888	888	888	888	888	888	1	888	88	88	88	88	22866.3	5 - Northeastern	16965035	23400
1213	2	56	2	4	3	5	2	0	888	888	888	0	888	888	888	888	888	888	888	1	888	1	1	88	88	22866.3	5 - Northeastern	16965035	23400
1214	2	55	2	2	5	2	2	0	888	888	888	0	888	888	888	888	888	888	888	1	888	2	88	88	88	22866.3	5 - Northeastern	16965035	23400
1215	2	63	2	3	3	4	2	0	888	888	888	0	888	888	888	888	888	888	888	1	888	88	88	88	1	22866.3	5 - Northeastern	16965035	23400
1216	2	59	2	7	1	9	2	0	888	888	888	0	888	888	888	888	888	888	888	1	888	0	0	0	0	22866.3	5 - Northeastern	16965035	23400
1217	2	56	4	6	1	6	2	0	888	888	888	0	888	888	888	888	888	888	888	1	888	2	4	88	88	22866.3	5 - Northeastern	16965035	23400
1218	2	54	2	6	3	4	2	0	888	888	888	0	888	888	888	888	888	888	888	1	888	0	1	1	2	22866.3	5 - Northeastern	16965035	23400
1219	2	62	2	6	6	4	2	0	888	888	888	0	888	888	888	888	888	888	888	1	888	0	0	0	1	22866.3	5 - Northeastern	16965035	23400
1220	2	57	2	4	3	5	2	0	888	888	888	0	888	888	888	888	888	888	888	1	888	1	2	88	88	22866.3	5 - Northeastern	16965035	23400
1221	2	43	2	4	2	5	2	0	888	888	888	0	888	888	888	888	888	888	888	2	1	0	0	1	2	22134.8	5 - Northeastern	16965035	23400
1222	2	48	2	6	4	5	2	0	888	888	888	0	888	888	888	888	888	888	888	1	888	88	88	88	88	22134.8	5 - Northeastern	16965035	23400
1223	2	40	2	6	2	6	2	0	888	888	888	0	888	888	888	888	888	888	888	1	888	0	0	0	0	22134.8	5 - Northeastern	16965035	23400
1224	2	40	2	2	3	2	2	0	888	888	888	0	888	888	888	888	888	888	888	1	888	0	0	0	0	22134.8	5 - Northeastern	16965035	23400
1225	2	46	2	4	2	5	2	0	888	888	888	0	888	888	888	888	888	888	888	1	888	1	1	2	2	22134.8	5 - Northeastern	16965035	23400
1226	2	43	2	6	1	5	3	0	888	888	888	0	888	888	888	888	888	888	888	1	888	0	0	88	88	22134.8	5 - Northeastern	16965035	23400
1227	2	42	3	2	3	4	2	0	888	888	888	0	888	888	888	888	888	888	888	1	888	88	88	88	88	22134.8	5 - Northeastern	16965035	23400
1228	2	49	2	6	9	4	2	0	888	888	888	0	888	888	888	888	888	888	888	1	888	0	1	2	2	22134.8	5 - Northeastern	16965035	23400
1229	2	45	2	6	2	5	2	0	888	888	888	0	888	888	888	888	888	888	888	1	888	0	0	0	0	22134.8	5 - Northeastern	16965035	23400
1230	2	30	1	7	1	6	2	0	888	888	888	0	888	888	888	888	888	888	888	1	888	1	1	2	2	23892.3	5 - Northeastern	16965035	23400
1231	2	35	2	6	2	5	2	0	888	888	888	0	888	888	888	888	888	888	888	1	888	88	88	88	88	23892.3	5 - Northeastern	16965035	23400
1232	2	30	1	7	2	7	2	0	888	888	888	0	888	888	888	888	888	888	888	1	888	0	0	0	0	23892.3	5 - Northeastern	16965035	23400
1233	2	32	1	6	2	4	2	0	888	888	888	0	888	888	888	888	888	888	888	1	888	0	0	0	0	23892.3	5 - Northeastern	16965035	23400
1234	2	34	2	6	3	5	2	0	888	888	888	0	888	888	888	888	888	888	888	1	888	0	0	0	0	23892.3	5 - Northeastern	16965035	23400
1235	2	22	1	5	10	1	2	0	888	888	888	0	888	888	888	888	888	888	888	1	888	0	0	1	2	22843.1	5 - Northeastern	16965035	23400
1236	2	20	1	5	10	1	2	0	888	888	888	0	888	888	888	888	888	888	888	1	888	2	4	4	4	22843.1	5 - Northeastern	16965035	23400
1237	2	29	1	6	3	4	2	0	888	888	888	0	888	888	888	888	888	888	888	1	888	88	88	88	88	22843.1	5 - Northeastern	16965035	23400
1238	2	21	1	5	10	2	2	0	888	888	888	0	888	888	888	888	888	888	888	1	888	0	1	1	1	22843.1	5 - Northeastern	16965035	23400
1239	2	24	1	6	11	2	2	0	888	888	888	0	888	888	888	888	888	888	888	1	888	88	88	88	88	22843.1	5 - Northeastern	16965035	23400
1240	2	22	1	5	10	2	3	0	888	888	888	0	888	888	888	888	888	888	888	1	888	1	1	2	2	22843.1	5 - Northeastern	16965035	23400
1241	2	26	1	6	2	4	2	0	888	888	888	0	888	888	888	888	888	888	888	1	888	0	0	0	0	22843.1	5 - Northeastern	16965035	23400
1242	1	58	2	6	4	4	2	1	56	1	5	0	888	888	888	888	888	888	888	2	1	0	0	1	1	23346.2	5 - Northeastern	16965035	23400
1243	1	59	2	6	3	3	2	1	888	4	5	1	10	0	0	0	0	0	4	1	888	2	2	3	3	23346.2	5 - Northeastern	16965035	23400
1244	1	41	1	6	4	4	2	1	40	1	5	1	10	0	0	0	0	0	0	2	1	1	1	2	2	23745.8	5 - Northeastern	16965035	23400
1245	1	47	2	6	5	3	2	1	30	1	5	1	10	0	0	0	0	0	0	2	1	0	1	1	1	23745.8	5 - Northeastern	16965035	23400
1246	1	41	1	2	9	3	2	1	41	1	5	1	10	0	0	0	0	0	0	2	1	2	4	88	88	23745.8	5 - Northeastern	16965035	23400
1247	1	35	2	4	3	4	2	1	26	1	2	4	0	0	0	0	1	0	2	3	4	88	88	1	88	23638.7	5 - Northeastern	16965035	23400
1248	1	49	2	6	4	5	2	1	42	1	2	5	1	0	0	0	1	0	2	1	888	88	88	88	88	23745.8	5 - Northeastern	16965035	23400
1249	1	36	2	6	1	7	2	1	888	4	5	1	10	0	0	0	0	0	4	1	888	2	2	2	2	23638.7	5 - Northeastern	16965035	23400
1250	1	21	1	5	10	2	2	1	21	1	1	1	10	0	0	0	0	0	0	2	2	3	5	88	88	23157.3	5 - Northeastern	16965035	23400
1251	1	27	2	6	2	5	3	1	27	1	5	1	10	0	0	0	0	0	4	3	4	0	0	0	0	23157.3	5 - Northeastern	16965035	23400
1252	2	62	2	6	6	4	2	1	20	4	5	2	10	0	0	0	0	0	2	1	888	0	1	2	2	22866.3	5 - Northeastern	16965035	23400
1253	2	30	1	6	2	5	2	1	25	4	5	0	888	888	888	888	888	888	888	1	888	1	1	1	3	23892.3	5 - Northeastern	16965035	23400
1254	2	35	3	6	1	8	2	1	34	1	5	1	10	0	0	0	0	0	4	1	888	0	0	0	1	23892.3	5 - Northeastern	16965035	23400
1255	2	28	1	6	3	4	2	1	22	3	1	1	0	0	0	1	0	0	4	1	888	88	88	2	88	22843.1	5 - Northeastern	16965035	23400
1256	2	20	1	5	10	3	2	1	19	1	5	1	10	0	0	0	0	0	4	1	888	0	0	0	1	22843.1	5 - Northeastern	16965035	23400
1257	2	26	1	4	2	4	2	1	26	1	5	1	10	0	0	0	0	0	4	2	1	1	1	1	2	22843.1	5 - Northeastern	16965035	23400
1258	1	59	2	1	5	3	2	0	888	888	888	0	888	888	888	888	888	888	888	3	1	2	5	8	10	23346.2	5 - Northeastern	16965035	23400
1259	1	37	2	1	5	2	2	0	888	888	888	0	888	888	888	888	888	888	888	1	888	3	5	8	10	23638.7	5 - Northeastern	16965035	23400
1260	1	23	1	3	5	3	2	0	888	888	888	0	888	888	888	888	888	888	888	1	888	2	3	5	7	23157.3	5 - Northeastern	16965035	23400
1261	2	57	2	1	6	1	2	0	888	888	888	0	888	888	888	888	888	888	888	1	888	2	3	5	9	22866.3	5 - Northeastern	16965035	23400
1262	2	59	2	1	6	1	2	0	888	888	888	0	888	888	888	888	888	888	888	1	888	2	3	4	6	22866.3	5 - Northeastern	16965035	23400
1263	2	59	2	1	7	2	2	0	888	888	888	0	888	888	888	888	888	888	888	1	888	88	88	88	88	22866.3	5 - Northeastern	16965035	23400
1264	2	46	2	2	5	2	2	0	888	888	888	0	888	888	888	888	888	888	888	1	888	99	99	99	99	22134.8	5 - Northeastern	16965035	23400
1265	2	47	2	1	3	3	2	0	888	888	888	0	888	888	888	888	888	888	888	1	888	88	88	88	88	22134.8	5 - Northeastern	16965035	23400
1266	2	37	2	4	5	3	2	0	888	888	888	0	888	888	888	888	888	888	888	1	888	88	88	88	88	23892.3	5 - Northeastern	16965035	23400
1267	2	35	2	2	3	3	2	0	888	888	888	0	888	888	888	888	888	888	888	1	888	1	3	5	8	23892.3	5 - Northeastern	16965035	23400
1268	2	28	1	6	2	3	2	0	888	888	888	0	888	888	888	888	888	888	888	1	888	99	99	99	99	22843.1	5 - Northeastern	16965035	23400
1269	2	21	1	5	10	1	2	0	888	888	888	0	888	888	888	888	888	888	888	3	2	5	7	88	88	22843.1	5 - Northeastern	16965035	23400
1270	1	61	4	1	6	1	2	1	60	1	5	0	888	888	888	888	888	888	888	3	4	2	5	12	15	23346.2	5 - Northeastern	16965035	23400
1271	1	59	2	1	7	2	2	1	56	1	5	3	10	0	0	0	0	0	4	2	3	2	4	7	10	23346.2	5 - Northeastern	16965035	23400
1272	1	41	2	3	3	5	2	1	39	3	5	2	10	0	0	0	0	0	4	3	4	4	8	10	13	23745.8	5 - Northeastern	16965035	23400
1273	1	48	2	3	2	4	2	1	888	1	3	0	888	888	888	888	888	888	888	3	1	2	5	12	15	23745.8	5 - Northeastern	16965035	23400
1274	1	33	3	6	1	5	2	1	30	4	5	0	888	888	888	888	888	888	888	2	3	3	6	9	11	23638.7	5 - Northeastern	16965035	23400
1275	2	62	2	1	6	1	2	1	59	4	5	0	888	888	888	888	888	888	888	1	888	1	3	5	9	22866.3	5 - Northeastern	16965035	23400
1276	1	34	2	7	1	5	3	0	888	888	888	0	888	888	888	888	888	888	888	2	1	0	0	1	2	23638.7	5 - Northeastern	16965035	23400
1277	1	38	2	3	5	2	2	0	888	888	888	0	888	888	888	888	888	888	888	3	4	1	2	4	5	23638.7	5 - Northeastern	16965035	23400
1278	1	38	1	6	4	5	2	0	888	888	888	0	888	888	888	888	888	888	888	3	3	88	88	88	88	23638.7	5 - Northeastern	16965035	23400
1279	1	36	2	2	5	3	2	0	888	888	888	0	888	888	888	888	888	888	888	1	888	2	5	10	14	23638.7	5 - Northeastern	16965035	23400
1280	1	35	1	6	1	5	2	0	888	888	888	0	888	888	888	888	888	888	888	1	888	0	0	1	1	23638.7	5 - Northeastern	16965035	23400
1281	1	39	4	4	4	5	2	0	888	888	888	0	888	888	888	888	888	888	888	1	888	1	1	1	1	23638.7	5 - Northeastern	16965035	23400
1282	1	33	1	6	9	3	2	0	888	888	888	0	888	888	888	888	888	888	888	2	3	1	2	4	5	23638.7	5 - Northeastern	16965035	23400
1283	1	28	1	3	2	3	2	0	888	888	888	0	888	888	888	888	888	888	888	1	888	3	5	10	13	23157.3	5 - Northeastern	16965035	23400
1284	1	27	1	6	9	4	2	0	888	888	888	0	888	888	888	888	888	888	888	3	4	0	0	0	1	23157.3	5 - Northeastern	16965035	23400
1285	1	22	1	5	10	2	2	0	888	888	888	0	888	888	888	888	888	888	888	2	2	2	3	5	88	23157.3	5 - Northeastern	16965035	23400
1286	1	27	1	6	1	4	2	0	888	888	888	0	888	888	888	888	888	888	888	2	1	0	0	1	2	23157.3	5 - Northeastern	16965035	23400
1287	1	22	1	5	10	2	2	0	888	888	888	0	888	888	888	888	888	888	888	1	888	88	88	88	88	23157.3	5 - Northeastern	16965035	23400
1288	1	25	1	6	1	4	2	0	888	888	888	0	888	888	888	888	888	888	888	2	1	3	5	7	9	23157.3	5 - Northeastern	16965035	23400
1289	1	21	1	3	2	3	2	0	888	888	888	0	888	888	888	888	888	888	888	1	888	4	7	12	16	23157.3	5 - Northeastern	16965035	23400
1290	1	20	1	5	10	1	3	0	888	888	888	0	888	888	888	888	888	888	888	1	888	0	1	2	2	23157.3	5 - Northeastern	16965035	23400
1291	1	20	1	5	10	1	2	0	888	888	888	0	888	888	888	888	888	888	888	1	888	88	88	88	88	23157.3	5 - Northeastern	16965035	23400
1292	1	56	2	2	3	6	2	0	888	888	888	0	888	888	888	888	888	888	888	1	888	0	0	0	0	23346.2	5 - Northeastern	16965035	23400
1293	1	56	2	7	1	9	2	0	888	888	888	0	888	888	888	888	888	888	888	2	1	0	0	1	1	23346.2	5 - Northeastern	16965035	23400
1294	1	55	2	6	1	7	2	0	888	888	888	0	888	888	888	888	888	888	888	1	888	88	88	88	88	23346.2	5 - Northeastern	16965035	23400
1295	1	57	4	1	3	3	2	0	888	888	888	0	888	888	888	888	888	888	888	3	3	88	88	88	88	23346.2	5 - Northeastern	16965035	23400
1296	1	60	2	1	6	1	2	0	888	888	888	0	888	888	888	888	888	888	888	3	1	3	7	13	18	23346.2	5 - Northeastern	16965035	23400
1297	1	75	2	1	7	3	2	0	888	888	888	0	888	888	888	888	888	888	888	3	1	0	0	0	1	23346.2	5 - Northeastern	16965035	23400
1298	1	61	2	6	6	5	2	0	888	888	888	0	888	888	888	888	888	888	888	1	888	0	0	0	2	23346.2	5 - Northeastern	16965035	23400
1299	1	55	2	2	3	3	2	0	888	888	888	0	888	888	888	888	888	888	888	1	888	88	88	88	88	23346.2	5 - Northeastern	16965035	23400
1300	1	64	4	1	6	1	2	0	888	888	888	0	888	888	888	888	888	888	888	1	888	3	5	9	14	23346.2	5 - Northeastern	16965035	23400
1301	1	60	4	1	3	3	2	0	888	888	888	0	888	888	888	888	888	888	888	2	1	2	3	5	6	23346.2	5 - Northeastern	16965035	23400
1302	1	64	4	1	7	1	2	0	888	888	888	0	888	888	888	888	888	888	888	1	888	1	2	2	2	23346.2	5 - Northeastern	16965035	23400
1303	1	71	2	7	6	5	2	0	888	888	888	0	888	888	888	888	888	888	888	2	1	0	1	1	1	23346.2	5 - Northeastern	16965035	23400
1304	1	64	2	2	5	2	2	0	888	888	888	0	888	888	888	888	888	888	888	1	888	0	0	88	88	23346.2	5 - Northeastern	16965035	23400
1305	1	51	4	1	6	2	2	0	888	888	888	0	888	888	888	888	888	888	888	2	1	1	2	3	5	23346.2	5 - Northeastern	16965035	23400
1306	1	60	2	2	5	4	2	0	888	888	888	0	888	888	888	888	888	888	888	1	888	88	88	88	88	23346.2	5 - Northeastern	16965035	23400
1307	1	53	2	1	7	2	2	0	888	888	888	0	888	888	888	888	888	888	888	3	1	2	5	10	12	23346.2	5 - Northeastern	16965035	23400
1308	1	51	2	4	2	4	2	0	888	888	888	0	888	888	888	888	888	888	888	1	888	0	0	0	1	23346.2	5 - Northeastern	16965035	23400
1309	1	50	2	3	3	5	2	0	888	888	888	0	888	888	888	888	888	888	888	1	888	2	4	5	6	23346.2	5 - Northeastern	16965035	23400
1310	1	52	4	1	5	2	2	0	888	888	888	0	888	888	888	888	888	888	888	1	888	99	99	99	99	23346.2	5 - Northeastern	16965035	23400
1311	1	69	2	3	5	3	2	0	888	888	888	0	888	888	888	888	888	888	888	1	888	88	99	88	88	23346.2	5 - Northeastern	16965035	23400
1312	1	54	2	1	7	2	2	0	888	888	888	0	888	888	888	888	888	888	888	3	1	4	7	11	16	23346.2	5 - Northeastern	16965035	23400
1313	1	55	2	4	1	6	2	0	888	888	888	0	888	888	888	888	888	888	888	1	888	0	0	1	2	23346.2	5 - Northeastern	16965035	23400
1314	1	51	2	6	1	7	2	0	888	888	888	0	888	888	888	888	888	888	888	1	888	2	4	88	88	23346.2	5 - Northeastern	16965035	23400
1315	1	47	2	6	1	5	2	0	888	888	888	0	888	888	888	888	888	888	888	1	888	1	2	88	88	23745.8	5 - Northeastern	16965035	23400
1316	1	47	2	3	5	3	2	0	888	888	888	0	888	888	888	888	888	888	888	2	4	0	1	1	1	23745.8	5 - Northeastern	16965035	23400
1317	1	44	2	4	5	2	2	0	888	888	888	0	888	888	888	888	888	888	888	3	4	3	5	7	10	23745.8	5 - Northeastern	16965035	23400
1318	1	43	2	6	2	4	2	0	888	888	888	0	888	888	888	888	888	888	888	2	1	0	1	1	2	23745.8	5 - Northeastern	16965035	23400
1319	1	40	2	2	3	3	2	0	888	888	888	0	888	888	888	888	888	888	888	2	1	0	1	1	1	23745.8	5 - Northeastern	16965035	23400
1320	1	40	2	6	2	6	2	0	888	888	888	0	888	888	888	888	888	888	888	2	3	88	88	88	88	23745.8	5 - Northeastern	16965035	23400
1321	1	48	2	4	4	5	2	0	888	888	888	0	888	888	888	888	888	888	888	1	888	0	0	0	1	23745.8	5 - Northeastern	16965035	23400
1322	1	45	2	6	2	5	2	0	888	888	888	0	888	888	888	888	888	888	888	2	1	0	2	2	2	23745.8	5 - Northeastern	16965035	23400
1323	1	42	2	2	9	4	2	0	888	888	888	0	888	888	888	888	888	888	888	1	888	88	88	88	88	23745.8	5 - Northeastern	16965035	23400
1324	1	37	2	3	3	3	2	0	888	888	888	0	888	888	888	888	888	888	888	3	4	3	6	10	14	23638.7	5 - Northeastern	16965035	23400
1325	1	39	3	6	4	5	2	0	888	888	888	0	888	888	888	888	888	888	888	3	3	2	4	5	6	23638.7	5 - Northeastern	16965035	23400
1326	1	31	1	6	2	5	2	0	888	888	888	0	888	888	888	888	888	888	888	1	888	88	88	88	88	23638.7	5 - Northeastern	16965035	23400
1327	1	35	1	3	5	3	2	0	888	888	888	0	888	888	888	888	888	888	888	3	1	4	6	10	14	23638.7	5 - Northeastern	16965035	23400
1328	1	60	2	2	5	3	2	0	888	888	888	0	888	888	888	888	888	888	888	3	1	0	0	0	88	23346.2	5 - Northeastern	16965035	23400
1329	1	53	2	2	5	2	2	0	888	888	888	0	888	888	888	888	888	888	888	1	888	99	99	99	99	23346.2	5 - Northeastern	16965035	23400
1330	1	59	2	1	5	3	2	0	888	888	888	0	888	888	888	888	888	888	888	3	1	5	8	12	17	23346.2	5 - Northeastern	16965035	23400
1331	2	70	2	1	4	4	2	0	888	888	888	0	888	888	888	888	888	888	888	1	888	88	88	88	88	22866.3	5 - Northeastern	16965035	23400
1332	2	55	4	2	5	2	2	0	888	888	888	0	888	888	888	888	888	888	888	1	888	1	2	4	5	22866.3	5 - Northeastern	16965035	23400
1333	2	70	2	1	6	2	2	0	888	888	888	0	888	888	888	888	888	888	888	1	888	0	0	88	88	22866.3	5 - Northeastern	16965035	23400
1334	2	62	2	4	3	5	2	0	888	888	888	0	888	888	888	888	888	888	888	1	888	0	1	2	2	22866.3	5 - Northeastern	16965035	23400
1335	2	62	4	2	11	1	2	0	888	888	888	0	888	888	888	888	888	888	888	1	888	88	88	88	88	22866.3	5 - Northeastern	16965035	23400
1336	2	61	4	1	6	1	2	0	888	888	888	0	888	888	888	888	888	888	888	1	888	1	1	2	2	22866.3	5 - Northeastern	16965035	23400
1337	2	72	2	1	6	1	2	0	888	888	888	0	888	888	888	888	888	888	888	1	888	1	1	88	88	22866.3	5 - Northeastern	16965035	23400
1338	2	63	2	7	4	5	3	0	888	888	888	0	888	888	888	888	888	888	888	1	888	1	2	2	2	22866.3	5 - Northeastern	16965035	23400
1339	2	65	2	6	1	7	2	0	888	888	888	0	888	888	888	888	888	888	888	1	888	0	0	0	0	22866.3	5 - Northeastern	16965035	23400
1340	2	62	2	1	6	1	2	0	888	888	888	0	888	888	888	888	888	888	888	1	888	4	6	10	14	22866.3	5 - Northeastern	16965035	23400
1341	2	64	2	1	6	1	2	0	888	888	888	0	888	888	888	888	888	888	888	1	888	2	3	5	6	22866.3	5 - Northeastern	16965035	23400
1342	2	61	2	1	3	5	2	0	888	888	888	0	888	888	888	888	888	888	888	1	888	0	0	0	0	22866.3	5 - Northeastern	16965035	23400
1343	2	56	2	6	1	6	2	0	888	888	888	0	888	888	888	888	888	888	888	1	888	0	1	2	3	22866.3	5 - Northeastern	16965035	23400
1344	2	66	2	1	6	1	2	0	888	888	888	0	888	888	888	888	888	888	888	1	888	99	99	99	99	22866.3	5 - Northeastern	16965035	23400
1345	2	54	4	1	5	2	2	0	888	888	888	0	888	888	888	888	888	888	888	1	888	2	4	5	7	22866.3	5 - Northeastern	16965035	23400
1346	2	67	2	1	7	3	2	0	888	888	888	0	888	888	888	888	888	888	888	1	888	0	0	0	0	22866.3	5 - Northeastern	16965035	23400
1347	2	59	2	3	3	3	2	0	888	888	888	0	888	888	888	888	888	888	888	1	888	0	1	2	2	22866.3	5 - Northeastern	16965035	23400
1348	2	61	4	2	3	3	2	0	888	888	888	0	888	888	888	888	888	888	888	1	888	0	0	0	0	22866.3	5 - Northeastern	16965035	23400
1349	2	66	4	1	6	1	2	0	888	888	888	0	888	888	888	888	888	888	888	1	888	88	88	88	88	22866.3	5 - Northeastern	16965035	23400
1350	2	63	2	2	3	4	2	0	888	888	888	0	888	888	888	888	888	888	888	1	888	88	88	88	88	22866.3	5 - Northeastern	16965035	23400
1351	2	54	2	1	6	2	2	0	888	888	888	0	888	888	888	888	888	888	888	1	888	2	3	6	8	22866.3	5 - Northeastern	16965035	23400
1352	2	52	2	4	5	3	2	0	888	888	888	0	888	888	888	888	888	888	888	1	888	0	0	0	1	22866.3	5 - Northeastern	16965035	23400
1353	2	51	2	7	1	7	2	0	888	888	888	0	888	888	888	888	888	888	888	1	888	1	1	1	1	22866.3	5 - Northeastern	16965035	23400
1354	2	50	2	2	3	3	2	0	888	888	888	0	888	888	888	888	888	888	888	1	888	2	3	88	88	22866.3	5 - Northeastern	16965035	23400
1355	2	58	2	1	7	2	2	0	888	888	888	0	888	888	888	888	888	888	888	1	888	2	4	8	10	22866.3	5 - Northeastern	16965035	23400
1356	2	59	4	2	5	2	2	0	888	888	888	0	888	888	888	888	888	888	888	1	888	99	99	99	99	22866.3	5 - Northeastern	16965035	23400
1357	2	55	2	6	1	8	2	0	888	888	888	0	888	888	888	888	888	888	888	1	888	0	0	1	1	22866.3	5 - Northeastern	16965035	23400
1358	2	52	2	6	1	7	2	0	888	888	888	0	888	888	888	888	888	888	888	1	888	0	0	88	88	22866.3	5 - Northeastern	16965035	23400
1359	2	61	4	1	6	1	2	0	888	888	888	0	888	888	888	888	888	888	888	1	888	99	99	99	99	22866.3	5 - Northeastern	16965035	23400
1360	2	63	2	1	6	1	2	0	888	888	888	0	888	888	888	888	888	888	888	1	888	88	88	88	88	22866.3	5 - Northeastern	16965035	23400
1361	2	56	2	4	3	6	2	0	888	888	888	0	888	888	888	888	888	888	888	1	888	0	0	1	1	22866.3	5 - Northeastern	16965035	23400
1362	2	53	2	6	2	6	3	0	888	888	888	0	888	888	888	888	888	888	888	2	1	1	1	2	3	22866.3	5 - Northeastern	16965035	23400
1363	2	56	2	1	7	2	2	0	888	888	888	0	888	888	888	888	888	888	888	1	888	2	4	5	7	22866.3	5 - Northeastern	16965035	23400
1364	2	42	2	4	3	4	2	0	888	888	888	0	888	888	888	888	888	888	888	1	888	99	99	99	99	22134.8	5 - Northeastern	16965035	23400
1365	2	40	2	6	3	5	2	0	888	888	888	0	888	888	888	888	888	888	888	1	888	88	1	88	88	22134.8	5 - Northeastern	16965035	23400
1366	2	43	2	1	7	2	2	0	888	888	888	0	888	888	888	888	888	888	888	1	888	88	88	88	88	22134.8	5 - Northeastern	16965035	23400
1367	2	40	2	2	3	6	2	0	888	888	888	0	888	888	888	888	888	888	888	1	888	88	88	88	88	22134.8	5 - Northeastern	16965035	23400
1368	2	40	1	2	5	3	2	0	888	888	888	0	888	888	888	888	888	888	888	2	1	0	1	1	2	22134.8	5 - Northeastern	16965035	23400
1369	2	41	2	4	2	4	2	0	888	888	888	0	888	888	888	888	888	888	888	1	888	0	0	1	1	22134.8	5 - Northeastern	16965035	23400
1370	2	46	2	4	3	3	2	0	888	888	888	0	888	888	888	888	888	888	888	1	888	88	88	88	88	22134.8	5 - Northeastern	16965035	23400
1371	2	44	2	1	6	2	2	0	888	888	888	0	888	888	888	888	888	888	888	1	888	88	88	88	88	22134.8	5 - Northeastern	16965035	23400
1372	2	49	2	6	1	6	2	0	888	888	888	0	888	888	888	888	888	888	888	1	888	1	1	1	2	22134.8	5 - Northeastern	16965035	23400
1373	2	41	2	6	1	5	2	0	888	888	888	0	888	888	888	888	888	888	888	2	1	0	0	1	1	22134.8	5 - Northeastern	16965035	23400
1374	2	46	2	1	5	2	2	0	888	888	888	0	888	888	888	888	888	888	888	1	888	3	5	8	11	22134.8	5 - Northeastern	16965035	23400
1375	2	47	2	4	3	4	2	0	888	888	888	0	888	888	888	888	888	888	888	1	888	1	2	4	5	22134.8	5 - Northeastern	16965035	23400
1376	2	34	2	6	3	3	2	0	888	888	888	0	888	888	888	888	888	888	888	1	888	1	4	5	7	23892.3	5 - Northeastern	16965035	23400
1377	2	32	2	6	2	5	2	0	888	888	888	0	888	888	888	888	888	888	888	1	888	88	88	88	1	23892.3	5 - Northeastern	16965035	23400
1378	2	31	1	4	2	4	2	0	888	888	888	0	888	888	888	888	888	888	888	1	888	3	5	10	13	23892.3	5 - Northeastern	16965035	23400
1379	2	30	1	6	1	4	2	0	888	888	888	0	888	888	888	888	888	888	888	1	888	1	1	88	88	23892.3	5 - Northeastern	16965035	23400
1380	2	31	1	6	2	4	3	0	888	888	888	0	888	888	888	888	888	888	888	2	1	0	1	2	2	23892.3	5 - Northeastern	16965035	23400
1381	2	36	2	6	2	3	2	0	888	888	888	0	888	888	888	888	888	888	888	1	888	2	3	5	6	23892.3	5 - Northeastern	16965035	23400
1382	2	36	1	6	4	5	2	0	888	888	888	0	888	888	888	888	888	888	888	1	888	88	88	88	88	23892.3	5 - Northeastern	16965035	23400
1383	2	38	2	1	3	3	2	0	888	888	888	0	888	888	888	888	888	888	888	1	888	2	4	88	88	23892.3	5 - Northeastern	16965035	23400
1384	2	33	3	6	1	5	3	0	888	888	888	0	888	888	888	888	888	888	888	1	888	0	0	0	0	23892.3	5 - Northeastern	16965035	23400
1385	2	33	2	6	9	4	2	0	888	888	888	0	888	888	888	888	888	888	888	1	888	0	1	2	2	23892.3	5 - Northeastern	16965035	23400
1386	2	35	2	6	1	4	2	0	888	888	888	0	888	888	888	888	888	888	888	1	888	88	88	88	88	23892.3	5 - Northeastern	16965035	23400
1387	2	37	2	6	8	5	1	0	888	888	888	0	888	888	888	888	888	888	888	1	888	0	0	0	1	23892.3	5 - Northeastern	16965035	23400
1388	2	27	2	4	2	3	2	0	888	888	888	0	888	888	888	888	888	888	888	1	888	99	99	99	99	22843.1	5 - Northeastern	16965035	23400
1389	2	21	1	5	10	2	2	0	888	888	888	0	888	888	888	888	888	888	888	1	888	88	88	88	88	22843.1	5 - Northeastern	16965035	23400
1390	2	25	1	4	2	4	2	0	888	888	888	0	888	888	888	888	888	888	888	1	888	88	88	88	88	22843.1	5 - Northeastern	16965035	23400
1391	2	20	1	5	10	2	2	0	888	888	888	0	888	888	888	888	888	888	888	1	888	1	1	88	88	22843.1	5 - Northeastern	16965035	23400
1392	2	20	1	5	10	2	2	0	888	888	888	0	888	888	888	888	888	888	888	2	1	1	2	2	3	22843.1	5 - Northeastern	16965035	23400
1393	2	20	1	5	10	1	3	0	888	888	888	0	888	888	888	888	888	888	888	1	888	88	88	88	88	22843.1	5 - Northeastern	16965035	23400
1394	2	28	1	2	2	3	2	0	888	888	888	0	888	888	888	888	888	888	888	1	888	99	99	99	99	22843.1	5 - Northeastern	16965035	23400
1395	2	28	2	3	3	3	2	0	888	888	888	0	888	888	888	888	888	888	888	1	888	88	88	88	88	22843.1	5 - Northeastern	16965035	23400
1396	2	20	1	5	10	1	2	0	888	888	888	0	888	888	888	888	888	888	888	1	888	0	1	1	2	22843.1	5 - Northeastern	16965035	23400
1397	2	22	1	5	10	3	2	0	888	888	888	0	888	888	888	888	888	888	888	1	888	2	3	88	88	22843.1	5 - Northeastern	16965035	23400
1398	1	31	1	6	3	4	2	1	23	1	1	1	0	1	0	2	1	0	0	3	4	0	0	1	1	23638.7	5 - Northeastern	16965035	23400
1399	1	31	1	6	2	4	3	1	31	1	5	1	10	0	0	0	0	0	0	1	888	2	88	88	88	23638.7	5 - Northeastern	16965035	23400
1400	1	24	1	6	2	3	2	1	20	1	5	2	10	0	0	0	0	0	4	3	3	2	4	5	7	23157.3	5 - Northeastern	16965035	23400
1401	1	26	1	6	4	4	2	1	20	1	1	1	0	0	0	1	0	0	2	3	3	88	88	1	88	23157.3	5 - Northeastern	16965035	23400
1402	1	22	1	5	10	1	2	1	21	1	5	2	0	0	0	0	0	0	0	2	4	0	0	1	2	23157.3	5 - Northeastern	16965035	23400
1403	1	25	1	6	10	2	2	1	21	1	1	1	0	0	0	0	0	0	4	3	4	88	88	88	88	23157.3	5 - Northeastern	16965035	23400
1404	1	21	1	5	10	2	2	1	20	1	5	1	10	0	0	0	0	0	4	1	888	0	0	1	3	23157.3	5 - Northeastern	16965035	23400
1405	1	61	4	1	6	2	2	1	57	3	1	3	10	0	0	0	0	0	4	3	3	2	4	6	7	23346.2	5 - Northeastern	16965035	23400
1406	1	52	2	6	9	4	3	1	51	2	5	1	10	0	0	0	0	0	0	2	1	0	1	2	2	23346.2	5 - Northeastern	16965035	23400
1407	1	53	2	4	3	7	2	1	888	1	5	0	888	888	888	888	888	888	888	3	3	2	2	2	4	23346.2	5 - Northeastern	16965035	23400
1408	1	49	2	3	4	4	2	1	888	2	8	1	0	0	0	0	0	0	0	1	888	88	88	88	88	23745.8	5 - Northeastern	16965035	23400
1409	1	42	2	1	5	2	2	1	30	1	3	1	1	0	0	0	0	0	2	3	4	6	9	13	18	23745.8	5 - Northeastern	16965035	23400
1410	1	45	2	4	7	2	2	1	44	1	1	3	10	0	0	0	0	0	2	3	4	1	3	4	6	23745.8	5 - Northeastern	16965035	23400
1411	1	46	2	1	5	3	2	1	27	1	3	1	10	0	0	0	0	0	2	3	4	6	9	13	17	23745.8	5 - Northeastern	16965035	23400
1412	1	37	2	6	1	7	2	1	888	4	5	1	10	0	0	0	0	0	4	1	888	0	0	0	2	23638.7	5 - Northeastern	16965035	23400
1413	2	75	4	6	6	2	2	1	888	2	5	0	888	888	888	888	888	888	888	1	888	0	1	1	2	22866.3	5 - Northeastern	16965035	23400
1414	2	60	2	1	7	1	2	1	60	1	5	1	10	0	0	0	0	0	0	1	888	88	88	88	88	22866.3	5 - Northeastern	16965035	23400
1415	2	46	1	4	7	2	2	1	20	3	2	1	0	0	0	1	0	0	2	1	888	1	88	88	88	22134.8	5 - Northeastern	16965035	23400
1416	2	46	2	6	2	7	2	1	46	1	5	1	10	0	0	0	0	0	2	1	888	2	4	5	6	22134.8	5 - Northeastern	16965035	23400
1417	2	49	2	3	3	3	2	1	48	1	5	3	10	0	0	0	0	0	2	1	888	1	2	3	3	22134.8	5 - Northeastern	16965035	23400
1418	2	30	1	6	2	5	2	1	30	1	5	1	10	0	0	0	0	0	0	1	888	1	2	4	5	23892.3	5 - Northeastern	16965035	23400
1419	2	37	2	8	1	5	2	1	999	1	5	0	888	888	888	888	888	888	888	1	888	0	0	1	2	23892.3	5 - Northeastern	16965035	23400
1420	2	28	1	4	4	4	2	1	20	2	9	1	0	0	0	0	0	0	4	1	888	88	2	88	88	22843.1	5 - Northeastern	16965035	23400
1421	2	21	1	5	10	2	2	1	21	1	5	1	10	0	0	0	0	0	4	1	888	0	0	0	1	22843.1	5 - Northeastern	16965035	23400
1422	1	58	4	1	6	1	2	0	888	888	888	0	888	888	888	888	888	888	888	2	2	88	88	88	88	23346.2	5 - Northeastern	16965035	23400
1423	1	70	4	1	6	1	2	0	888	888	888	0	888	888	888	888	888	888	888	3	3	99	99	99	99	23346.2	5 - Northeastern	16965035	23400
1424	1	61	4	1	6	2	2	0	888	888	888	0	888	888	888	888	888	888	888	1	888	99	99	99	99	23346.2	5 - Northeastern	16965035	23400
1425	1	69	2	1	7	2	2	0	888	888	888	0	888	888	888	888	888	888	888	3	1	4	7	10	15	23346.2	5 - Northeastern	16965035	23400
1426	1	54	2	1	6	1	2	0	888	888	888	0	888	888	888	888	888	888	888	1	888	1	1	2	2	23346.2	5 - Northeastern	16965035	23400
1427	1	44	2	1	7	2	2	0	888	888	888	0	888	888	888	888	888	888	888	1	888	3	6	10	14	23745.8	5 - Northeastern	16965035	23400
1428	1	48	2	4	3	4	2	0	888	888	888	0	888	888	888	888	888	888	888	1	888	1	2	2	2	23745.8	5 - Northeastern	16965035	23400
1429	1	47	2	3	7	2	2	0	888	888	888	0	888	888	888	888	888	888	888	3	3	1	1	1	2	23745.8	5 - Northeastern	16965035	23400
1430	1	52	4	2	7	2	2	0	888	888	888	0	888	888	888	888	888	888	888	3	4	88	88	88	88	23346.2	5 - Northeastern	16965035	23400
1431	1	59	2	2	6	1	2	0	888	888	888	0	888	888	888	888	888	888	888	1	888	1	1	2	3	23346.2	5 - Northeastern	16965035	23400
1432	1	68	4	1	7	2	2	0	888	888	888	0	888	888	888	888	888	888	888	3	1	88	88	88	88	23346.2	5 - Northeastern	16965035	23400
1433	1	36	2	4	3	4	2	0	888	888	888	0	888	888	888	888	888	888	888	1	888	3	7	11	11	23638.7	5 - Northeastern	16965035	23400
1434	1	36	3	4	7	3	2	0	888	888	888	0	888	888	888	888	888	888	888	3	4	88	88	88	88	23638.7	5 - Northeastern	16965035	23400
1435	1	33	2	3	2	4	2	0	888	888	888	0	888	888	888	888	888	888	888	1	888	3	7	10	10	23638.7	5 - Northeastern	16965035	23400
1436	1	35	3	2	5	2	2	0	888	888	888	0	888	888	888	888	888	888	888	1	888	1	2	3	3	23638.7	5 - Northeastern	16965035	23400
1437	1	31	1	3	2	3	2	0	888	888	888	0	888	888	888	888	888	888	888	1	888	88	88	88	88	23638.7	5 - Northeastern	16965035	23400
1438	1	21	1	5	10	1	2	0	888	888	888	0	888	888	888	888	888	888	888	1	888	99	99	99	99	23157.3	5 - Northeastern	16965035	23400
1439	1	27	2	3	2	4	2	0	888	888	888	0	888	888	888	888	888	888	888	1	888	6	10	10	10	23157.3	5 - Northeastern	16965035	23400
1440	1	26	1	6	2	3	2	0	888	888	888	0	888	888	888	888	888	888	888	1	888	99	99	99	99	23157.3	5 - Northeastern	16965035	23400
1441	1	24	1	2	2	3	2	0	888	888	888	0	888	888	888	888	888	888	888	1	888	5	8	11	11	23157.3	5 - Northeastern	16965035	23400
1442	1	24	1	6	1	4	2	0	888	888	888	0	888	888	888	888	888	888	888	1	888	1	1	1	2	23157.3	5 - Northeastern	16965035	23400
1443	1	21	1	3	2	3	2	0	888	888	888	0	888	888	888	888	888	888	888	1	888	4	7	10	10	23157.3	5 - Northeastern	16965035	23400
1444	2	56	4	1	6	2	2	0	888	888	888	0	888	888	888	888	888	888	888	1	888	1	2	3	5	22866.3	5 - Northeastern	16965035	23400
1445	2	50	2	1	3	2	2	0	888	888	888	0	888	888	888	888	888	888	888	1	888	5	8	12	18	22866.3	5 - Northeastern	16965035	23400
1446	2	61	4	1	7	2	2	0	888	888	888	0	888	888	888	888	888	888	888	1	888	99	99	99	99	22866.3	5 - Northeastern	16965035	23400
1447	2	53	2	1	6	1	2	0	888	888	888	0	888	888	888	888	888	888	888	1	888	4	7	12	17	22866.3	5 - Northeastern	16965035	23400
1448	2	54	4	1	5	2	2	0	888	888	888	0	888	888	888	888	888	888	888	1	888	88	88	88	88	22866.3	5 - Northeastern	16965035	23400
1449	2	59	2	1	3	2	2	0	888	888	888	0	888	888	888	888	888	888	888	1	888	4	7	11	15	22866.3	5 - Northeastern	16965035	23400
1450	2	55	2	1	7	3	2	0	888	888	888	0	888	888	888	888	888	888	888	1	888	99	99	99	99	22866.3	5 - Northeastern	16965035	23400
1451	2	63	2	1	6	1	2	0	888	888	888	0	888	888	888	888	888	888	888	1	888	4	8	14	17	22866.3	5 - Northeastern	16965035	23400
1452	2	51	2	1	7	2	2	0	888	888	888	0	888	888	888	888	888	888	888	1	888	99	99	99	99	22866.3	5 - Northeastern	16965035	23400
1453	2	67	4	1	6	1	2	0	888	888	888	0	888	888	888	888	888	888	888	1	888	1	2	3	4	22866.3	5 - Northeastern	16965035	23400
1454	2	64	2	1	6	2	2	0	888	888	888	0	888	888	888	888	888	888	888	1	888	3	5	8	11	22866.3	5 - Northeastern	16965035	23400
1455	2	57	2	2	5	2	2	0	888	888	888	0	888	888	888	888	888	888	888	1	888	2	2	3	4	22866.3	5 - Northeastern	16965035	23400
1456	2	67	2	1	6	2	2	0	888	888	888	0	888	888	888	888	888	888	888	1	888	88	88	88	88	22866.3	5 - Northeastern	16965035	23400
1457	2	65	4	1	6	2	2	0	888	888	888	0	888	888	888	888	888	888	888	1	888	1	1	2	2	22866.3	5 - Northeastern	16965035	23400
1458	2	78	4	1	6	1	2	0	888	888	888	0	888	888	888	888	888	888	888	1	888	88	88	88	88	22866.3	5 - Northeastern	16965035	23400
1459	2	58	2	2	6	1	2	0	888	888	888	0	888	888	888	888	888	888	888	1	888	1	2	2	2	22866.3	5 - Northeastern	16965035	23400
1460	2	80	4	1	6	1	2	0	888	888	888	0	888	888	888	888	888	888	888	1	888	88	88	88	88	22866.3	5 - Northeastern	16965035	23400
1461	2	49	2	1	7	2	2	0	888	888	888	0	888	888	888	888	888	888	888	1	888	88	88	88	88	22134.8	5 - Northeastern	16965035	23400
1462	2	47	2	2	5	2	2	0	888	888	888	0	888	888	888	888	888	888	888	1	888	88	88	88	88	22134.8	5 - Northeastern	16965035	23400
1463	2	47	2	1	3	3	2	0	888	888	888	0	888	888	888	888	888	888	888	1	888	3	7	11	16	22134.8	5 - Northeastern	16965035	23400
1464	2	46	1	2	7	2	2	0	888	888	888	0	888	888	888	888	888	888	888	1	888	1	2	3	3	22134.8	5 - Northeastern	16965035	23400
1465	2	41	1	3	5	2	2	0	888	888	888	0	888	888	888	888	888	888	888	1	888	88	88	88	88	22134.8	5 - Northeastern	16965035	23400
1466	2	46	2	1	3	3	2	0	888	888	888	0	888	888	888	888	888	888	888	1	888	2	4	7	10	22134.8	5 - Northeastern	16965035	23400
1467	2	31	3	6	2	2	2	0	888	888	888	0	888	888	888	888	888	888	888	1	888	1	2	2	4	23892.3	5 - Northeastern	16965035	23400
1468	2	34	2	4	3	3	2	0	888	888	888	0	888	888	888	888	888	888	888	1	888	88	88	88	88	23892.3	5 - Northeastern	16965035	23400
1469	2	34	2	2	6	2	2	0	888	888	888	0	888	888	888	888	888	888	888	1	888	5	8	14	19	23892.3	5 - Northeastern	16965035	23400
1470	2	33	3	6	3	4	2	0	888	888	888	0	888	888	888	888	888	888	888	1	888	2	2	3	3	23892.3	5 - Northeastern	16965035	23400
1471	2	32	2	6	1	5	2	0	888	888	888	0	888	888	888	888	888	888	888	1	888	3	7	11	16	23892.3	5 - Northeastern	16965035	23400
1472	2	26	1	4	2	3	2	0	888	888	888	0	888	888	888	888	888	888	888	1	888	1	1	2	4	22843.1	5 - Northeastern	16965035	23400
1473	2	28	2	3	2	4	2	0	888	888	888	0	888	888	888	888	888	888	888	1	888	4	9	10	15	22843.1	5 - Northeastern	16965035	23400
1474	2	26	1	3	2	4	2	0	888	888	888	0	888	888	888	888	888	888	888	1	888	99	99	99	99	22843.1	5 - Northeastern	16965035	23400
1475	2	22	1	5	10	1	2	0	888	888	888	0	888	888	888	888	888	888	888	1	888	1	1	2	2	22843.1	5 - Northeastern	16965035	23400
1476	2	29	3	6	2	3	2	0	888	888	888	0	888	888	888	888	888	888	888	1	888	1	2	3	4	22843.1	5 - Northeastern	16965035	23400
1477	2	23	1	5	10	2	2	0	888	888	888	0	888	888	888	888	888	888	888	1	888	88	88	88	88	22843.1	5 - Northeastern	16965035	23400
1478	1	48	2	1	5	3	2	1	25	1	3	0	888	888	888	888	888	888	888	3	1	5	8	10	12	23745.8	5 - Northeastern	16965035	23400
1479	1	49	2	3	3	3	2	1	47	4	5	0	888	888	888	888	888	888	888	2	1	2	3	3	3	23745.8	5 - Northeastern	16965035	23400
1480	1	48	2	1	5	3	2	1	25	1	3	0	888	888	888	888	888	888	888	3	1	4	7	9	13	23745.8	5 - Northeastern	16965035	23400
1481	1	54	2	1	5	3	2	1	32	4	5	2	10	0	0	0	0	0	0	3	1	4	9	12	12	23346.2	5 - Northeastern	16965035	23400
1482	1	64	4	1	7	2	2	1	61	1	5	3	10	0	0	0	0	0	2	3	4	2	2	3	3	23346.2	5 - Northeastern	16965035	23400
1483	1	56	2	1	7	2	2	1	30	4	5	0	888	888	888	888	888	888	888	1	888	4	6	9	13	23346.2	5 - Northeastern	16965035	23400
1484	1	51	4	1	7	2	2	1	49	3	5	2	10	0	0	0	0	0	2	3	4	2	3	4	4	23346.2	5 - Northeastern	16965035	23400
1485	1	64	2	1	7	2	2	1	40	2	5	0	888	888	888	888	888	888	888	3	1	4	7	10	14	23346.2	5 - Northeastern	16965035	23400
1486	1	56	2	2	6	1	2	1	54	1	5	3	10	0	0	0	0	0	2	2	2	2	3	4	5	23346.2	5 - Northeastern	16965035	23400
1487	1	67	2	1	7	2	2	1	40	4	5	0	888	888	888	888	888	888	888	3	1	5	8	12	12	23346.2	5 - Northeastern	16965035	23400
1488	1	34	2	2	5	2	2	1	31	4	5	0	888	888	888	888	888	888	888	1	888	1	2	2	3	23638.7	5 - Northeastern	16965035	23400
1489	2	54	2	1	6	1	2	1	888	4	5	0	888	888	888	888	888	888	888	1	888	5	8	15	19	22866.3	5 - Northeastern	16965035	23400
1490	2	43	2	2	3	3	2	1	30	4	5	0	888	888	888	888	888	888	888	1	888	3	6	10	14	22134.8	5 - Northeastern	16965035	23400
1491	2	37	2	3	3	3	2	1	29	4	5	1	10	0	0	0	0	0	4	1	888	4	7	10	13	23892.3	5 - Northeastern	16965035	23400
1492	1	52	4	1	6	1	2	0	888	888	888	0	888	888	888	888	888	888	888	3	4	1	2	3	3	23346.2	5 - Northeastern	16965035	23400
1493	1	55	2	1	6	1	2	0	888	888	888	0	888	888	888	888	888	888	888	1	888	99	99	99	99	23346.2	5 - Northeastern	16965035	23400
1494	1	51	2	1	7	1	2	0	888	888	888	0	888	888	888	888	888	888	888	3	3	99	99	99	99	23346.2	5 - Northeastern	16965035	23400
1495	1	63	2	1	6	1	2	0	888	888	888	0	888	888	888	888	888	888	888	1	888	88	88	88	88	23346.2	5 - Northeastern	16965035	23400
1496	1	64	4	1	6	1	2	0	888	888	888	0	888	888	888	888	888	888	888	1	888	1	1	2	3	23346.2	5 - Northeastern	16965035	23400
1497	1	64	2	1	7	2	2	0	888	888	888	0	888	888	888	888	888	888	888	3	1	3	6	10	11	23346.2	5 - Northeastern	16965035	23400
1498	1	66	2	1	7	2	2	0	888	888	888	0	888	888	888	888	888	888	888	1	888	3	7	10	10	23346.2	5 - Northeastern	16965035	23400
1499	1	69	2	1	7	2	2	0	888	888	888	0	888	888	888	888	888	888	888	3	1	99	99	99	99	23346.2	5 - Northeastern	16965035	23400
1500	1	73	4	1	6	1	2	0	888	888	888	0	888	888	888	888	888	888	888	1	888	4	8	11	11	23346.2	5 - Northeastern	16965035	23400
1501	1	48	2	4	7	1	2	0	888	888	888	0	888	888	888	888	888	888	888	1	888	88	88	88	88	23745.8	5 - Northeastern	16965035	23400
1502	1	44	1	3	7	1	2	0	888	888	888	0	888	888	888	888	888	888	888	1	888	88	88	88	88	23745.8	5 - Northeastern	16965035	23400
1503	1	47	2	2	7	3	2	0	888	888	888	0	888	888	888	888	888	888	888	3	1	88	88	88	88	23745.8	5 - Northeastern	16965035	23400
1504	1	30	2	3	2	4	2	0	888	888	888	0	888	888	888	888	888	888	888	3	1	4	8	10	10	23638.7	5 - Northeastern	16965035	23400
1505	1	39	2	3	5	4	2	0	888	888	888	0	888	888	888	888	888	888	888	1	888	3	7	10	10	23638.7	5 - Northeastern	16965035	23400
1506	1	28	1	6	2	5	2	0	888	888	888	0	888	888	888	888	888	888	888	1	888	5	8	10	10	23157.3	5 - Northeastern	16965035	23400
1507	1	24	1	2	5	2	2	0	888	888	888	0	888	888	888	888	888	888	888	1	888	99	99	99	99	23157.3	5 - Northeastern	16965035	23400
1508	1	21	1	5	10	1	2	0	888	888	888	0	888	888	888	888	888	888	888	1	888	99	99	99	99	23157.3	5 - Northeastern	16965035	23400
1509	1	24	1	4	2	4	2	0	888	888	888	0	888	888	888	888	888	888	888	1	888	4	6	10	10	23157.3	5 - Northeastern	16965035	23400
1510	2	54	2	2	6	1	2	0	888	888	888	0	888	888	888	888	888	888	888	1	888	88	88	88	88	22866.3	5 - Northeastern	16965035	23400
1511	2	58	4	1	6	1	2	0	888	888	888	0	888	888	888	888	888	888	888	1	888	88	88	88	88	22866.3	5 - Northeastern	16965035	23400
1512	2	78	4	1	6	1	2	0	888	888	888	0	888	888	888	888	888	888	888	1	888	88	88	88	88	22866.3	5 - Northeastern	16965035	23400
1513	2	69	4	1	6	1	2	0	888	888	888	0	888	888	888	888	888	888	888	1	888	1	1	2	2	22866.3	5 - Northeastern	16965035	23400
1514	2	73	4	1	6	1	2	0	888	888	888	0	888	888	888	888	888	888	888	1	888	88	88	88	88	22866.3	5 - Northeastern	16965035	23400
1515	2	60	4	1	6	1	2	0	888	888	888	0	888	888	888	888	888	888	888	1	888	1	2	2	4	22866.3	5 - Northeastern	16965035	23400
1516	2	70	4	1	6	2	2	0	888	888	888	0	888	888	888	888	888	888	888	1	888	88	88	88	88	22866.3	5 - Northeastern	16965035	23400
1517	2	61	2	1	6	1	2	0	888	888	888	0	888	888	888	888	888	888	888	1	888	1	1	2	2	22866.3	5 - Northeastern	16965035	23400
1518	2	69	2	1	6	1	2	0	888	888	888	0	888	888	888	888	888	888	888	1	888	88	88	88	88	22866.3	5 - Northeastern	16965035	23400
1519	2	64	4	1	6	1	2	0	888	888	888	0	888	888	888	888	888	888	888	1	888	1	2	3	3	22866.3	5 - Northeastern	16965035	23400
1520	2	64	4	1	6	1	2	0	888	888	888	0	888	888	888	888	888	888	888	1	888	4	8	11	11	22866.3	5 - Northeastern	16965035	23400
1521	2	51	4	1	7	2	2	0	888	888	888	0	888	888	888	888	888	888	888	1	888	1	1	2	2	22866.3	5 - Northeastern	16965035	23400
1522	2	59	2	1	6	1	2	0	888	888	888	0	888	888	888	888	888	888	888	1	888	1	1	2	2	22866.3	5 - Northeastern	16965035	23400
1523	2	54	2	1	3	2	2	0	888	888	888	0	888	888	888	888	888	888	888	1	888	88	88	88	88	22866.3	5 - Northeastern	16965035	23400
1524	2	49	2	2	7	1	2	0	888	888	888	0	888	888	888	888	888	888	888	1	888	99	99	99	99	22134.8	5 - Northeastern	16965035	23400
1525	2	44	1	1	5	2	2	0	888	888	888	0	888	888	888	888	888	888	888	1	888	99	99	99	99	22134.8	5 - Northeastern	16965035	23400
1526	2	46	2	4	2	4	2	0	888	888	888	0	888	888	888	888	888	888	888	1	888	5	8	9	9	22134.8	5 - Northeastern	16965035	23400
1527	2	41	2	2	2	3	2	0	888	888	888	0	888	888	888	888	888	888	888	1	888	1	2	3	4	22134.8	5 - Northeastern	16965035	23400
1528	2	43	2	1	3	3	2	0	888	888	888	0	888	888	888	888	888	888	888	1	888	1	2	2	3	22134.8	5 - Northeastern	16965035	23400
1529	2	35	2	4	3	3	2	0	888	888	888	0	888	888	888	888	888	888	888	1	888	99	99	99	99	23892.3	5 - Northeastern	16965035	23400
1530	2	34	2	3	3	3	2	0	888	888	888	0	888	888	888	888	888	888	888	1	888	3	5	8	10	23892.3	5 - Northeastern	16965035	23400
1531	2	33	1	6	5	2	2	0	888	888	888	0	888	888	888	888	888	888	888	1	888	1	1	2	2	23892.3	5 - Northeastern	16965035	23400
1532	2	36	2	2	3	3	2	0	888	888	888	0	888	888	888	888	888	888	888	1	888	5	8	10	10	23892.3	5 - Northeastern	16965035	23400
1533	2	38	2	3	2	2	2	0	888	888	888	0	888	888	888	888	888	888	888	1	888	1	1	2	2	23892.3	5 - Northeastern	16965035	23400
1534	2	39	2	2	7	2	2	0	888	888	888	0	888	888	888	888	888	888	888	1	888	4	7	8	8	23892.3	5 - Northeastern	16965035	23400
1535	2	21	1	5	10	1	2	0	888	888	888	0	888	888	888	888	888	888	888	1	888	88	88	88	88	22843.1	5 - Northeastern	16965035	23400
1536	2	21	1	5	10	2	2	0	888	888	888	0	888	888	888	888	888	888	888	1	888	88	88	88	88	22843.1	5 - Northeastern	16965035	23400
1537	2	28	1	6	1	4	2	0	888	888	888	0	888	888	888	888	888	888	888	1	888	2	2	3	4	22843.1	5 - Northeastern	16965035	23400
1538	2	25	1	4	2	4	2	0	888	888	888	0	888	888	888	888	888	888	888	1	888	3	7	10	10	22843.1	5 - Northeastern	16965035	23400
1539	2	28	1	1	3	3	2	0	888	888	888	0	888	888	888	888	888	888	888	1	888	3	6	10	10	22843.1	5 - Northeastern	16965035	23400
1540	1	53	4	1	5	3	2	1	40	4	5	0	888	888	888	888	888	888	888	3	1	99	99	99	99	23346.2	5 - Northeastern	16965035	23400
1541	1	59	2	2	5	3	2	1	30	1	3	0	888	888	888	888	888	888	888	3	1	3	8	8	8	23346.2	5 - Northeastern	16965035	23400
1542	1	68	4	1	6	1	2	1	67	1	1	5	0	0	0	0	0	0	0	3	4	1	1	2	3	23346.2	5 - Northeastern	16965035	23400
1543	1	54	2	1	6	1	2	1	50	4	5	3	10	0	0	0	0	0	2	3	4	2	2	3	4	23346.2	5 - Northeastern	16965035	23400
1544	1	42	2	2	7	2	2	1	40	3	5	0	888	888	888	888	888	888	888	2	2	1	1	2	2	23745.8	5 - Northeastern	16965035	23400
1545	1	41	4	1	5	3	2	1	35	1	3	0	888	888	888	888	888	888	888	3	1	4	9	10	10	23745.8	5 - Northeastern	16965035	23400
1546	1	44	2	1	5	3	2	1	30	1	3	1	10	0	0	0	0	0	4	3	4	4	7	10	10	23745.8	5 - Northeastern	16965035	23400
1547	1	46	2	1	5	3	2	1	35	1	3	1	10	1	0	0	0	0	4	3	1	3	7	9	9	23745.8	5 - Northeastern	16965035	23400
1548	1	39	4	4	3	4	2	1	37	4	5	0	888	888	888	888	888	888	888	2	2	1	2	3	3	23638.7	5 - Northeastern	16965035	23400
1549	1	34	4	6	3	4	2	1	32	1	5	0	888	888	888	888	888	888	888	3	4	1	2	3	4	23638.7	5 - Northeastern	16965035	23400
1550	1	37	2	3	5	4	2	1	27	1	3	1	10	0	0	1	0	0	4	3	4	5	8	9	9	23638.7	5 - Northeastern	16965035	23400
1551	1	31	1	6	2	3	2	1	31	1	1	4	0	0	0	0	0	0	0	3	4	1	2	3	3	23638.7	5 - Northeastern	16965035	23400
1552	1	29	1	2	5	2	2	1	28	3	5	3	10	0	0	0	0	0	4	3	4	1	2	3	4	23157.3	5 - Northeastern	16965035	23400
1553	2	57	2	1	7	2	2	1	999	4	5	0	888	888	888	888	888	888	888	1	888	5	8	10	10	22866.3	5 - Northeastern	16965035	23400
1554	2	41	2	3	2	4	2	1	39	4	5	1	10	0	0	0	0	0	4	1	888	4	8	10	10	22134.8	5 - Northeastern	16965035	23400
1555	2	49	2	3	3	3	2	1	40	4	5	0	888	888	888	888	888	888	888	1	888	4	6	9	10	22134.8	5 - Northeastern	16965035	23400
1556	1	56	3	3	5	3	2	0	888	888	888	0	888	888	888	888	888	888	888	3	4	88	88	99	99	23346.2	5 - Northeastern	16965035	23400
1557	1	50	4	1	3	4	2	0	888	888	888	0	888	888	888	888	888	888	888	3	4	99	99	99	99	23346.2	5 - Northeastern	16965035	23400
1558	1	53	3	1	5	3	2	0	888	888	888	0	888	888	888	888	888	888	888	3	4	99	99	99	99	23346.2	5 - Northeastern	16965035	23400
1559	1	50	2	1	6	1	2	0	888	888	888	0	888	888	888	888	888	888	888	3	1	88	88	88	88	23346.2	5 - Northeastern	16965035	23400
1560	1	51	3	2	3	3	2	0	888	888	888	0	888	888	888	888	888	888	888	1	888	88	88	88	88	23346.2	5 - Northeastern	16965035	23400
1561	1	46	2	6	2	7	2	0	888	888	888	0	888	888	888	888	888	888	888	1	888	88	88	99	99	23745.8	5 - Northeastern	16965035	23400
1562	1	42	2	2	5	4	2	0	888	888	888	0	888	888	888	888	888	888	888	3	4	99	99	99	99	23745.8	5 - Northeastern	16965035	23400
1563	1	48	2	6	2	6	2	1	40	1	5	0	888	888	888	888	888	888	888	1	888	88	88	99	99	23745.8	5 - Northeastern	16965035	23400
1564	1	33	1	4	2	5	2	1	32	1	5	2	10	0	0	0	0	0	0	3	4	4	4	4	4	23638.7	5 - Northeastern	16965035	23400
1565	1	36	3	2	5	2	2	1	30	1	5	2	10	0	0	0	0	0	0	3	4	3	4	4	4	23638.7	5 - Northeastern	16965035	23400
1566	1	38	99	4	2	5	2	1	999	1	5	0	888	888	888	888	888	888	888	3	4	99	99	99	99	23638.7	5 - Northeastern	16965035	23400
1567	1	22	1	2	5	3	2	1	20	1	2	5	1	9	9	0	0	0	9	3	4	3	3	3	88	23157.3	5 - Northeastern	16965035	23400
1568	1	26	1	2	5	3	2	1	22	1	2	5	1	9	9	0	0	0	9	3	4	3	3	3	88	23157.3	5 - Northeastern	16965035	23400
1569	1	28	1	3	2	4	2	0	888	888	888	0	888	888	888	888	888	888	888	1	888	99	99	99	99	23157.3	5 - Northeastern	16965035	23400
1570	2	52	2	1	5	2	2	0	888	888	888	0	888	888	888	888	888	888	888	1	888	99	99	99	99	22866.3	5 - Northeastern	16965035	23400
1571	2	60	2	1	7	3	2	0	888	888	888	0	888	888	888	888	888	888	888	1	888	99	99	99	99	22866.3	5 - Northeastern	16965035	23400
1572	2	59	4	1	2	3	2	0	888	888	888	0	888	888	888	888	888	888	888	1	888	99	99	99	99	22866.3	5 - Northeastern	16965035	23400
1573	2	56	2	2	3	2	2	0	888	888	888	0	888	888	888	888	888	888	888	1	888	88	88	88	88	22866.3	5 - Northeastern	16965035	23400
1574	2	55	2	2	4	5	2	0	888	888	888	0	888	888	888	888	888	888	888	1	888	88	88	88	88	22866.3	5 - Northeastern	16965035	23400
1575	2	59	4	3	3	3	2	0	888	888	888	0	888	888	888	888	888	888	888	1	888	88	88	88	88	22866.3	5 - Northeastern	16965035	23400
1576	2	58	2	2	5	3	2	0	888	888	888	0	888	888	888	888	888	888	888	1	888	88	88	88	88	22866.3	5 - Northeastern	16965035	23400
1577	2	27	1	6	1	5	2	0	888	888	888	0	888	888	888	888	888	888	888	1	888	99	99	99	99	22843.1	5 - Northeastern	16965035	23400
1578	2	24	1	6	2	4	2	0	888	888	888	0	888	888	888	888	888	888	888	1	888	99	99	99	99	22843.1	5 - Northeastern	16965035	23400
1579	2	29	3	2	3	4	2	0	888	888	888	0	888	888	888	888	888	888	888	1	888	88	99	99	99	22843.1	5 - Northeastern	16965035	23400
1580	2	36	3	3	3	5	2	0	888	888	888	0	888	888	888	888	888	888	888	1	888	99	99	99	99	23892.3	5 - Northeastern	16965035	23400
1581	2	38	3	4	2	5	2	0	888	888	888	0	888	888	888	888	888	888	888	1	888	88	88	99	99	23892.3	5 - Northeastern	16965035	23400
1582	2	35	2	6	2	6	2	0	888	888	888	0	888	888	888	888	888	888	888	1	888	99	99	99	99	23892.3	5 - Northeastern	16965035	23400
1583	2	48	3	1	5	3	2	0	888	888	888	0	888	888	888	888	888	888	888	1	888	88	88	88	88	22134.8	5 - Northeastern	16965035	23400
1584	2	41	1	6	2	6	2	0	888	888	888	0	888	888	888	888	888	888	888	1	888	88	88	88	88	22134.8	5 - Northeastern	16965035	23400
1585	2	47	3	1	6	99	2	0	888	888	888	0	888	888	888	888	888	888	888	1	888	99	99	99	99	22134.8	5 - Northeastern	16965035	23400
1586	2	49	3	3	2	5	2	0	888	888	888	0	888	888	888	888	888	888	888	1	888	88	88	88	88	22134.8	5 - Northeastern	16965035	23400
1587	1	51	3	6	1	8	2	0	888	888	888	0	888	888	888	888	888	888	888	3	1	99	99	99	99	23346.2	5 - Northeastern	16965035	23400
1588	2	65	2	1	6	2	2	0	888	888	888	0	888	888	888	888	888	888	888	1	888	88	88	88	88	22866.3	5 - Northeastern	16965035	23400
1589	2	61	2	1	3	2	2	0	888	888	888	0	888	888	888	888	888	888	888	1	888	88	88	88	88	22866.3	5 - Northeastern	16965035	23400
1590	2	60	2	1	7	3	2	0	888	888	888	0	888	888	888	888	888	888	888	1	888	88	88	88	88	22866.3	5 - Northeastern	16965035	23400
1591	2	57	2	1	3	3	2	0	888	888	888	0	888	888	888	888	888	888	888	1	888	88	88	88	88	22866.3	5 - Northeastern	16965035	23400
1592	2	54	2	2	7	3	2	0	888	888	888	0	888	888	888	888	888	888	888	1	888	88	88	88	88	22866.3	5 - Northeastern	16965035	23400
1593	2	51	2	2	2	3	2	0	888	888	888	0	888	888	888	888	888	888	888	1	888	88	88	88	88	22866.3	5 - Northeastern	16965035	23400
1594	2	50	4	2	5	2	2	0	888	888	888	0	888	888	888	888	888	888	888	3	4	99	99	99	99	22866.3	5 - Northeastern	16965035	23400
1595	2	46	2	3	2	3	2	0	888	888	888	0	888	888	888	888	888	888	888	1	888	88	88	88	88	22134.8	5 - Northeastern	16965035	23400
1596	2	43	4	1	5	2	2	0	888	888	888	0	888	888	888	888	888	888	888	1	888	88	88	88	88	22134.8	5 - Northeastern	16965035	23400
1597	2	39	2	3	2	3	2	0	888	888	888	0	888	888	888	888	888	888	888	3	1	88	88	88	88	23892.3	5 - Northeastern	16965035	23400
1598	2	31	1	4	4	5	2	0	888	888	888	0	888	888	888	888	888	888	888	1	888	88	88	88	88	23892.3	5 - Northeastern	16965035	23400
1599	2	28	1	5	2	3	2	0	888	888	888	0	888	888	888	888	888	888	888	3	4	99	99	99	99	22843.1	5 - Northeastern	16965035	23400
1600	1	63	2	1	7	2	2	0	888	888	888	0	888	888	888	888	888	888	888	3	4	88	88	88	88	23346.2	5 - Northeastern	16965035	23400
1601	2	20	1	3	10	1	2	0	888	888	888	0	888	888	888	888	888	888	888	1	888	88	88	88	88	22843.1	5 - Northeastern	16965035	23400
1602	1	55	2	1	3	2	2	0	888	888	888	0	888	888	888	888	888	888	888	1	888	88	88	88	88	23346.2	5 - Northeastern	16965035	23400
1603	1	53	2	2	3	4	2	0	888	888	888	0	888	888	888	888	888	888	888	3	4	88	88	88	88	23346.2	5 - Northeastern	16965035	23400
1604	1	52	2	3	5	3	2	0	888	888	888	0	888	888	888	888	888	888	888	3	4	88	88	88	88	23346.2	5 - Northeastern	16965035	23400
1605	1	23	1	6	2	3	2	0	888	888	888	0	888	888	888	888	888	888	888	1	888	88	88	88	88	23157.3	5 - Northeastern	16965035	23400
1606	1	25	1	6	2	4	2	0	888	888	888	0	888	888	888	888	888	888	888	1	888	88	88	88	88	23157.3	5 - Northeastern	16965035	23400
1607	1	33	2	4	2	4	2	0	888	888	888	0	888	888	888	888	888	888	888	1	888	88	88	88	88	23638.7	5 - Northeastern	16965035	23400
1608	1	37	2	3	4	5	2	0	888	888	888	0	888	888	888	888	888	888	888	3	4	88	88	88	88	23638.7	5 - Northeastern	16965035	23400
1609	1	43	1	3	5	3	2	1	999	4	5	5	10	0	0	0	0	0	4	1	888	88	88	88	88	23745.8	5 - Northeastern	16965035	23400
1610	1	45	4	1	5	2	2	0	888	888	888	0	888	888	888	888	888	888	888	3	4	99	99	99	99	23745.8	5 - Northeastern	16965035	23400
1611	1	51	2	1	7	3	2	1	888	3	6	0	888	888	888	888	888	888	888	3	1	88	88	88	88	23346.2	5 - Northeastern	16965035	23400
1612	1	30	1	4	2	4	2	0	888	888	888	0	888	888	888	888	888	888	888	1	888	99	99	99	99	23638.7	5 - Northeastern	16965035	23400
1613	1	28	1	3	2	3	2	0	888	888	888	0	888	888	888	888	888	888	888	3	4	88	88	88	88	23157.3	5 - Northeastern	16965035	23400
1614	1	25	1	2	2	3	2	1	25	4	5	5	10	0	0	0	0	0	0	1	888	99	99	99	99	23157.3	5 - Northeastern	16965035	23400
1615	1	33	1	2	2	3	2	1	999	3	6	6	10	0	0	0	0	0	2	3	4	99	99	99	99	23638.7	5 - Northeastern	16965035	23400
1616	1	47	2	3	2	3	2	0	888	888	888	0	888	888	888	888	888	888	888	1	888	99	99	99	99	23745.8	5 - Northeastern	16965035	23400
1617	1	49	2	1	4	9	2	0	888	888	888	0	888	888	888	888	888	888	888	1	888	99	99	99	99	23745.8	5 - Northeastern	16965035	23400
1618	1	54	4	1	5	2	2	0	888	888	888	0	888	888	888	888	888	888	888	3	3	99	99	99	99	23346.2	5 - Northeastern	16965035	23400
1619	1	35	2	1	3	3	2	0	888	888	888	0	888	888	888	888	888	888	888	2	4	99	99	3	88	23638.7	5 - Northeastern	16965035	23400
1620	1	56	2	1	5	2	2	0	888	888	888	0	888	888	888	888	888	888	888	3	4	99	99	99	99	23346.2	5 - Northeastern	16965035	23400
1621	1	59	1	1	5	3	2	0	888	888	888	0	888	888	888	888	888	888	888	2	1	99	99	99	99	23346.2	5 - Northeastern	16965035	23400
1622	1	62	2	1	6	1	2	0	888	888	888	0	888	888	888	888	888	888	888	2	1	99	99	99	99	23346.2	5 - Northeastern	16965035	23400
1623	2	20	1	3	2	3	2	0	888	888	888	0	888	888	888	888	888	888	888	1	888	99	99	99	99	22843.1	5 - Northeastern	16965035	23400
1624	2	28	1	3	2	3	2	0	888	888	888	0	888	888	888	888	888	888	888	1	888	99	99	99	99	22843.1	5 - Northeastern	16965035	23400
1625	2	37	2	1	5	2	2	0	888	888	888	0	888	888	888	888	888	888	888	1	888	99	99	99	99	23892.3	5 - Northeastern	16965035	23400
1626	2	39	3	2	3	4	2	0	888	888	888	0	888	888	888	888	888	888	888	1	888	99	99	99	99	23892.3	5 - Northeastern	16965035	23400
1627	2	42	2	2	2	3	2	0	888	888	888	0	888	888	888	888	888	888	888	1	888	99	99	99	99	22134.8	5 - Northeastern	16965035	23400
1628	2	47	3	2	2	2	2	1	888	4	5	5	9	0	0	0	0	0	9	1	888	99	99	99	99	22134.8	5 - Northeastern	16965035	23400
1629	2	57	2	1	6	1	2	1	999	2	5	5	10	0	0	0	0	0	2	1	888	88	88	88	88	22866.3	5 - Northeastern	16965035	23400
1630	2	55	2	1	3	3	2	0	888	888	888	0	888	888	888	888	888	888	888	1	888	99	99	99	99	22866.3	5 - Northeastern	16965035	23400
1631	2	57	2	1	3	5	2	0	888	888	888	0	888	888	888	888	888	888	888	1	888	99	99	3	88	22866.3	5 - Northeastern	16965035	23400
1632	2	60	2	1	6	1	2	0	888	888	888	0	888	888	888	888	888	888	888	1	888	99	99	99	99	22866.3	5 - Northeastern	16965035	23400
1633	2	65	4	1	6	1	2	0	888	888	888	0	888	888	888	888	888	888	888	1	888	99	99	99	99	22866.3	5 - Northeastern	16965035	23400
1634	2	69	4	1	7	1	2	0	888	888	888	0	888	888	888	888	888	888	888	1	888	99	99	99	99	22866.3	5 - Northeastern	16965035	23400
1635	2	70	4	1	6	1	2	0	888	888	888	0	888	888	888	888	888	888	888	1	888	99	99	99	99	22866.3	5 - Northeastern	16965035	23400
1636	2	53	3	1	7	2	2	0	888	888	888	0	888	888	888	888	888	888	888	1	888	88	88	88	88	22866.3	5 - Northeastern	16965035	23400
1637	1	55	3	1	7	1	2	1	50	1	5	2	10	1	0	0	0	0	0	3	4	3	3	88	88	23346.2	5 - Northeastern	16965035	23400
1638	2	56	3	1	7	1	2	0	888	888	888	0	888	888	888	888	888	888	888	1	888	2	2	88	88	22866.3	5 - Northeastern	16965035	23400
1639	1	58	3	1	7	2	2	0	888	888	888	0	888	888	888	888	888	888	888	3	1	88	88	88	88	23346.2	5 - Northeastern	16965035	23400
1640	1	24	1	2	5	3	2	1	20	1	1	4	1	2	9	0	0	0	0	3	4	5	5	6	6	23157.3	5 - Northeastern	16965035	23400
1641	1	25	1	2	7	2	2	0	888	888	888	0	888	888	888	888	888	888	888	3	4	88	88	99	99	23157.3	5 - Northeastern	16965035	23400
1642	2	54	2	1	3	3	2	0	888	888	888	0	888	888	888	888	888	888	888	1	888	88	88	88	88	22866.3	5 - Northeastern	16965035	23400
1643	2	56	2	1	4	8	2	0	888	888	888	0	888	888	888	888	888	888	888	1	888	88	88	88	88	22866.3	5 - Northeastern	16965035	23400
1644	2	48	4	1	7	1	2	0	888	888	888	0	888	888	888	888	888	888	888	1	888	99	99	99	99	22134.8	5 - Northeastern	16965035	23400
1645	2	35	3	3	3	5	2	1	888	4	5	0	888	888	888	888	888	888	888	1	888	99	99	99	99	23892.3	5 - Northeastern	16965035	23400
1646	2	23	1	3	2	3	2	0	888	888	888	0	888	888	888	888	888	888	888	1	888	88	88	88	88	22843.1	5 - Northeastern	16965035	23400
1647	1	59	2	1	5	3	2	0	888	888	888	0	888	888	888	888	888	888	888	2	1	99	99	99	99	23346.2	5 - Northeastern	16965035	23400
1648	1	46	2	2	2	3	2	0	888	888	888	0	888	888	888	888	888	888	888	1	888	88	88	88	88	23745.8	5 - Northeastern	16965035	23400
1649	1	33	1	4	5	3	2	1	999	3	6	5	10	0	0	0	0	0	4	1	888	88	88	88	88	23638.7	5 - Northeastern	16965035	23400
1650	1	21	1	3	10	1	2	0	888	888	888	0	888	888	888	888	888	888	888	1	888	99	99	88	88	23157.3	5 - Northeastern	16965035	23400
1651	2	27	1	3	2	3	2	0	888	888	888	0	888	888	888	888	888	888	888	1	888	88	88	2	88	22843.1	5 - Northeastern	16965035	23400
1652	2	32	3	3	3	6	2	1	888	3	6	5	10	0	0	0	0	0	4	1	888	88	88	88	88	23892.3	5 - Northeastern	16965035	23400
1653	2	45	4	2	3	4	2	1	888	4	5	5	10	0	0	0	0	0	0	1	888	88	2	99	99	22134.8	5 - Northeastern	16965035	23400
1654	2	56	2	1	3	4	2	0	888	888	888	0	888	888	888	888	888	888	888	1	888	88	88	88	88	22866.3	5 - Northeastern	16965035	23400
1655	2	59	2	1	6	1	2	0	888	888	888	0	888	888	888	888	888	888	888	1	888	99	99	88	88	22866.3	5 - Northeastern	16965035	23400
1656	1	22	1	2	2	3	2	0	888	888	888	0	888	888	888	888	888	888	888	3	4	99	99	99	99	23157.3	5 - Northeastern	16965035	23400
1657	1	35	3	3	2	3	2	1	888	4	5	5	10	0	0	0	0	0	0	1	888	88	88	88	88	23638.7	5 - Northeastern	16965035	23400
1658	1	47	2	2	3	3	2	0	888	888	888	0	888	888	888	888	888	888	888	3	4	88	88	88	3	23745.8	5 - Northeastern	16965035	23400
1659	1	68	2	1	7	1	2	0	888	888	888	0	888	888	888	888	888	888	888	3	4	88	88	88	88	23346.2	5 - Northeastern	16965035	23400
1660	1	22	1	2	5	2	2	0	888	888	888	0	888	888	888	888	888	888	888	3	4	5	7	7	88	23157.3	5 - Northeastern	16965035	23400
1661	1	25	1	6	2	3	2	0	888	888	888	0	888	888	888	888	888	888	888	3	4	88	88	88	88	23157.3	5 - Northeastern	16965035	23400
1662	1	28	3	3	3	3	2	1	25	1	5	2	10	0	0	0	0	0	0	3	4	3	3	88	88	23157.3	5 - Northeastern	16965035	23400
1663	1	48	2	1	7	1	2	1	43	3	5	3	1	2	0	2	0	0	0	3	4	2	3	3	88	23745.8	5 - Northeastern	16965035	23400
1664	1	46	2	3	4	5	2	0	888	888	888	0	888	888	888	888	888	888	888	3	4	88	88	88	88	23745.8	5 - Northeastern	16965035	23400
1665	1	45	1	2	9	3	2	0	888	888	888	0	888	888	888	888	888	888	888	3	1	2	2	3	4	23745.8	5 - Northeastern	16965035	23400
1666	1	44	3	2	7	3	2	1	40	1	5	4	1	0	0	1	0	0	0	3	4	5	5	88	88	23745.8	5 - Northeastern	16965035	23400
1667	1	40	3	2	3	3	2	0	888	888	888	0	888	888	888	888	888	888	888	2	1	88	88	88	88	23745.8	5 - Northeastern	16965035	23400
1668	1	42	2	6	1	6	2	0	888	888	888	0	888	888	888	888	888	888	888	2	1	88	88	88	88	23745.8	5 - Northeastern	16965035	23400
1669	1	48	2	2	7	2	2	1	45	1	5	2	0	0	0	0	0	0	0	3	4	2	2	5	5	23745.8	5 - Northeastern	16965035	23400
1670	1	33	3	2	7	2	2	1	30	1	5	2	10	0	0	0	0	0	0	3	4	3	4	4	4	23638.7	5 - Northeastern	16965035	23400
1671	1	27	1	2	5	2	2	1	24	1	1	5	1	1	0	0	0	0	0	3	4	20	20	88	88	23157.3	5 - Northeastern	16965035	23400
1672	1	28	2	6	1	3	2	0	888	888	888	0	888	888	888	888	888	888	888	2	1	88	88	88	88	23157.3	5 - Northeastern	16965035	23400
1673	1	37	3	2	7	2	2	0	888	888	888	0	888	888	888	888	888	888	888	3	4	88	88	88	2	23638.7	5 - Northeastern	16965035	23400
1674	1	36	2	6	2	4	2	0	888	888	888	0	888	888	888	888	888	888	888	3	1	88	88	88	88	23638.7	5 - Northeastern	16965035	23400
1675	1	32	1	4	5	4	2	0	888	888	888	0	888	888	888	888	888	888	888	3	4	88	88	88	88	23638.7	5 - Northeastern	16965035	23400
1676	1	50	2	3	2	4	2	0	888	888	888	0	888	888	888	888	888	888	888	3	1	88	88	88	88	23346.2	5 - Northeastern	16965035	23400
1677	1	56	2	1	7	1	2	1	888	1	5	2	10	0	0	0	0	0	0	3	4	4	4	88	88	23346.2	5 - Northeastern	16965035	23400
1678	1	54	3	3	4	6	2	0	888	888	888	0	888	888	888	888	888	888	888	3	1	88	88	1	1	23346.2	5 - Northeastern	16965035	23400
1679	1	24	1	4	2	3	2	1	23	1	5	2	10	0	0	0	0	0	0	3	4	4	4	4	4	23157.3	5 - Northeastern	16965035	23400
1680	1	60	3	1	7	2	2	1	55	1	5	3	10	0	0	0	0	0	0	3	4	2	2	88	88	23346.2	5 - Northeastern	16965035	23400
1681	1	59	3	1	11	1	2	1	55	1	5	0	888	888	888	888	888	888	888	3	1	1	1	4	4	23346.2	5 - Northeastern	16965035	23400
1682	1	58	2	2	7	1	2	0	888	888	888	0	888	888	888	888	888	888	888	3	4	88	88	88	88	23346.2	5 - Northeastern	16965035	23400
1683	1	57	2	2	7	1	2	1	55	3	5	2	10	0	0	0	0	0	0	3	4	2	2	88	88	23346.2	5 - Northeastern	16965035	23400
1684	1	54	3	2	7	1	2	0	888	888	888	0	888	888	888	888	888	888	888	3	4	88	88	2	2	23346.2	5 - Northeastern	16965035	23400
1685	1	51	2	1	5	3	2	1	47	1	2	5	2	9	0	0	0	0	0	3	4	3	3	3	88	23346.2	5 - Northeastern	16965035	23400
1686	1	55	2	1	7	1	2	1	50	4	5	1	10	0	0	0	0	0	0	3	1	4	4	8	8	23346.2	5 - Northeastern	16965035	23400
1687	1	57	3	1	3	4	2	1	51	3	5	3	10	0	0	0	0	0	0	3	4	4	4	88	88	23346.2	5 - Northeastern	16965035	23400
1688	1	32	2	2	7	2	2	1	28	1	2	5	1	9	9	0	0	0	9	3	4	3	3	3	88	23638.7	5 - Northeastern	16965035	23400
1689	2	56	2	2	5	4	2	1	999	1	5	2	10	0	0	0	0	0	0	1	888	10	10	20	20	22866.3	5 - Northeastern	16965035	23400
1690	2	57	2	1	7	1	2	0	888	888	888	0	888	888	888	888	888	888	888	1	888	88	88	88	88	22866.3	5 - Northeastern	16965035	23400
1691	2	54	2	2	7	1	2	0	888	888	888	0	888	888	888	888	888	888	888	1	888	88	88	88	88	22866.3	5 - Northeastern	16965035	23400
1692	2	63	3	1	7	1	2	0	888	888	888	0	888	888	888	888	888	888	888	1	888	88	88	4	5	22866.3	5 - Northeastern	16965035	23400
1693	2	52	3	1	7	99	2	0	888	888	888	0	888	888	888	888	888	888	888	1	888	88	88	88	88	22866.3	5 - Northeastern	16965035	23400
1694	2	51	99	6	1	6	2	0	888	888	888	0	888	888	888	888	888	888	888	1	888	2	88	88	88	22866.3	5 - Northeastern	16965035	23400
1695	2	62	2	1	11	1	2	1	58	4	5	1	10	0	0	0	0	0	0	1	888	4	10	10	88	22866.3	5 - Northeastern	16965035	23400
1696	2	55	3	1	7	5	2	0	888	888	888	0	888	888	888	888	888	888	888	1	888	88	88	88	88	22866.3	5 - Northeastern	16965035	23400
1697	2	60	2	1	7	1	2	0	888	888	888	0	888	888	888	888	888	888	888	1	888	88	88	88	88	22866.3	5 - Northeastern	16965035	23400
1698	2	54	3	3	3	4	2	1	52	1	5	1	10	0	0	0	0	0	0	1	888	8	8	10	10	22866.3	5 - Northeastern	16965035	23400
1699	2	53	3	1	7	1	2	1	48	1	5	1	10	0	0	0	0	0	0	1	888	4	4	10	10	22866.3	5 - Northeastern	16965035	23400
1700	2	56	2	2	7	1	2	1	50	1	5	4	10	0	0	0	0	0	0	1	888	10	10	88	88	22866.3	5 - Northeastern	16965035	23400
1701	2	30	2	2	7	2	2	1	27	1	5	1	10	0	0	0	0	0	0	1	888	88	88	2	2	23892.3	5 - Northeastern	16965035	23400
1702	2	39	2	3	4	5	2	1	35	1	5	0	888	888	888	888	888	888	888	1	888	88	88	88	88	23892.3	5 - Northeastern	16965035	23400
1703	2	35	2	4	7	2	2	1	30	1	5	1	10	0	0	0	0	0	0	1	888	7	8	88	88	23892.3	5 - Northeastern	16965035	23400
1704	2	32	2	2	7	1	2	0	888	888	888	0	888	888	888	888	888	888	888	1	888	88	88	88	88	23892.3	5 - Northeastern	16965035	23400
1705	2	38	2	4	4	5	2	0	888	888	888	0	888	888	888	888	888	888	888	1	888	88	88	88	88	23892.3	5 - Northeastern	16965035	23400
1706	2	22	1	3	11	1	2	0	888	888	888	0	888	888	888	888	888	888	888	1	888	88	88	88	88	22843.1	5 - Northeastern	16965035	23400
1707	2	27	1	6	4	4	2	0	888	888	888	0	888	888	888	888	888	888	888	1	888	88	88	88	88	22843.1	5 - Northeastern	16965035	23400
1708	2	25	1	6	2	3	2	0	888	888	888	0	888	888	888	888	888	888	888	1	888	88	88	88	88	22843.1	5 - Northeastern	16965035	23400
1709	2	24	1	4	3	3	2	1	22	1	5	0	888	888	888	888	888	888	888	1	888	88	2	2	4	22843.1	5 - Northeastern	16965035	23400
1710	2	27	3	2	5	2	2	1	24	1	5	1	10	0	0	0	0	0	0	1	888	3	4	4	10	22843.1	5 - Northeastern	16965035	23400
1711	2	28	3	3	3	3	2	1	26	1	5	1	10	0	0	0	0	0	0	1	888	88	88	88	88	22843.1	5 - Northeastern	16965035	23400
1712	2	47	3	2	7	1	2	0	888	888	888	0	888	888	888	888	888	888	888	1	888	88	88	88	88	22134.8	5 - Northeastern	16965035	23400
1713	2	43	2	4	2	4	2	0	888	888	888	0	888	888	888	888	888	888	888	1	888	88	88	88	88	22134.8	5 - Northeastern	16965035	23400
1714	2	44	2	6	1	6	2	0	888	888	888	0	888	888	888	888	888	888	888	1	888	88	88	88	88	22134.8	5 - Northeastern	16965035	23400
1715	2	45	3	4	7	2	2	1	40	3	5	1	10	0	0	0	0	0	0	1	888	2	2	88	88	22134.8	5 - Northeastern	16965035	23400
1716	2	41	2	6	2	5	2	0	888	888	888	0	888	888	888	888	888	888	888	1	888	88	88	88	88	22134.8	5 - Northeastern	16965035	23400
1717	2	42	2	1	7	1	2	0	888	888	888	0	888	888	888	888	888	888	888	1	888	88	1	88	88	22134.8	5 - Northeastern	16965035	23400
1718	2	46	2	2	5	2	2	0	888	888	888	0	888	888	888	888	888	888	888	1	888	2	2	88	88	22134.8	5 - Northeastern	16965035	23400
1719	2	48	3	1	7	2	2	1	45	4	5	1	10	0	0	0	0	0	0	1	888	5	88	88	88	22134.8	5 - Northeastern	16965035	23400
1720	2	67	2	1	6	2	2	0	888	888	888	0	888	888	888	888	888	888	888	1	888	88	88	88	88	22866.3	5 - Northeastern	16965035	23400
1721	1	21	1	2	10	1	2	0	888	888	888	0	888	888	888	888	888	888	888	1	888	88	88	88	88	23157.3	5 - Northeastern	16965035	23400
1722	1	25	1	3	2	3	2	0	888	888	888	0	888	888	888	888	888	888	888	1	888	88	88	88	88	23157.3	5 - Northeastern	16965035	23400
1723	1	27	1	2	9	3	2	0	888	888	888	0	888	888	888	888	888	888	888	3	4	88	88	88	88	23157.3	5 - Northeastern	16965035	23400
1724	1	28	1	6	2	4	2	0	888	888	888	0	888	888	888	888	888	888	888	1	888	88	88	88	88	23157.3	5 - Northeastern	16965035	23400
1725	1	30	1	4	2	5	2	0	888	888	888	0	888	888	888	888	888	888	888	1	888	88	88	88	88	23638.7	5 - Northeastern	16965035	23400
1726	1	33	1	4	2	4	2	0	888	888	888	0	888	888	888	888	888	888	888	1	888	99	99	99	99	23638.7	5 - Northeastern	16965035	23400
1727	1	35	2	4	2	4	2	0	888	888	888	0	888	888	888	888	888	888	888	1	888	99	99	99	99	23638.7	5 - Northeastern	16965035	23400
1728	1	36	1	3	2	3	2	0	888	888	888	0	888	888	888	888	888	888	888	3	4	99	99	99	99	23638.7	5 - Northeastern	16965035	23400
1729	1	39	2	3	5	2	2	1	888	1	2	9	10	0	0	0	1	3	4	3	4	3	88	88	88	23638.7	5 - Northeastern	16965035	23400
1730	1	43	4	2	2	3	2	0	888	888	888	0	888	888	888	888	888	888	888	3	4	99	99	99	99	23745.8	5 - Northeastern	16965035	23400
1731	1	45	2	2	4	3	2	0	888	888	888	0	888	888	888	888	888	888	888	3	4	88	88	88	88	23745.8	5 - Northeastern	16965035	23400
1732	1	46	2	1	5	2	2	0	888	888	888	0	888	888	888	888	888	888	888	3	4	99	99	99	99	23745.8	5 - Northeastern	16965035	23400
1733	1	48	2	2	4	3	2	1	888	1	2	9	10	9	0	0	1	0	4	3	4	99	99	99	99	23745.8	5 - Northeastern	16965035	23400
1734	1	48	2	3	2	3	2	0	888	888	888	0	888	888	888	888	888	888	888	3	4	88	88	88	88	23745.8	5 - Northeastern	16965035	23400
1735	1	53	2	1	5	2	2	0	888	888	888	0	888	888	888	888	888	888	888	3	4	99	99	99	99	23346.2	5 - Northeastern	16965035	23400
1736	1	54	4	1	7	3	2	0	888	888	888	0	888	888	888	888	888	888	888	3	4	88	88	88	88	23346.2	5 - Northeastern	16965035	23400
1737	1	55	2	1	5	2	2	0	888	888	888	0	888	888	888	888	888	888	888	2	4	88	88	88	88	23346.2	5 - Northeastern	16965035	23400
1738	1	58	2	1	7	3	2	0	888	888	888	0	888	888	888	888	888	888	888	1	888	88	88	88	88	23346.2	5 - Northeastern	16965035	23400
1739	1	59	2	1	7	3	2	0	888	888	888	0	888	888	888	888	888	888	888	3	4	99	99	99	99	23346.2	5 - Northeastern	16965035	23400
1740	1	60	2	1	6	3	2	0	888	888	888	0	888	888	888	888	888	888	888	1	888	88	88	88	88	23346.2	5 - Northeastern	16965035	23400
1741	1	61	2	3	7	3	2	0	888	888	888	0	888	888	888	888	888	888	888	3	4	99	99	99	99	23346.2	5 - Northeastern	16965035	23400
1742	1	63	2	3	3	3	2	0	888	888	888	0	888	888	888	888	888	888	888	3	1	99	99	99	99	23346.2	5 - Northeastern	16965035	23400
1743	1	67	2	1	6	2	2	0	888	888	888	0	888	888	888	888	888	888	888	3	1	88	88	88	88	23346.2	5 - Northeastern	16965035	23400
1744	2	20	1	1	2	3	2	0	888	888	888	0	888	888	888	888	888	888	888	1	888	88	88	88	88	22843.1	5 - Northeastern	16965035	23400
1745	2	23	1	2	2	3	2	0	888	888	888	0	888	888	888	888	888	888	888	1	888	88	88	88	88	22843.1	5 - Northeastern	16965035	23400
1746	2	26	1	6	2	3	2	0	888	888	888	0	888	888	888	888	888	888	888	1	888	99	99	99	99	22843.1	5 - Northeastern	16965035	23400
1747	2	28	2	4	2	3	2	0	888	888	888	0	888	888	888	888	888	888	888	3	1	88	88	88	88	22843.1	5 - Northeastern	16965035	23400
1748	2	31	1	6	2	4	2	0	888	888	888	0	888	888	888	888	888	888	888	1	888	99	99	99	99	23892.3	5 - Northeastern	16965035	23400
1749	2	33	1	2	5	2	2	0	888	888	888	0	888	888	888	888	888	888	888	1	888	99	99	99	99	23892.3	5 - Northeastern	16965035	23400
1750	2	34	2	2	2	3	2	0	888	888	888	0	888	888	888	888	888	888	888	1	888	88	88	88	88	23892.3	5 - Northeastern	16965035	23400
1751	2	35	2	3	5	2	2	0	888	888	888	0	888	888	888	888	888	888	888	1	888	88	88	88	88	23892.3	5 - Northeastern	16965035	23400
1752	2	39	2	1	5	2	2	0	888	888	888	0	888	888	888	888	888	888	888	1	888	88	88	88	88	23892.3	5 - Northeastern	16965035	23400
1753	2	45	2	2	2	3	2	0	888	888	888	0	888	888	888	888	888	888	888	1	888	99	99	99	99	22134.8	5 - Northeastern	16965035	23400
1754	2	48	2	1	4	4	2	0	888	888	888	0	888	888	888	888	888	888	888	1	888	88	88	88	88	22134.8	5 - Northeastern	16965035	23400
1755	2	42	2	2	3	3	2	0	888	888	888	0	888	888	888	888	888	888	888	3	4	88	88	88	88	22134.8	5 - Northeastern	16965035	23400
1756	2	44	2	1	5	2	2	0	888	888	888	0	888	888	888	888	888	888	888	1	888	88	88	88	88	22134.8	5 - Northeastern	16965035	23400
1757	2	47	2	1	5	3	2	0	888	888	888	0	888	888	888	888	888	888	888	1	888	88	88	88	88	22134.8	5 - Northeastern	16965035	23400
1758	2	51	2	1	7	2	2	1	888	4	5	2	10	0	0	0	0	0	9	1	888	88	88	88	88	22866.3	5 - Northeastern	16965035	23400
1759	2	53	2	1	3	2	2	0	888	888	888	0	888	888	888	888	888	888	888	1	888	88	88	88	88	22866.3	5 - Northeastern	16965035	23400
1760	2	54	2	2	7	3	2	0	888	888	888	0	888	888	888	888	888	888	888	1	888	88	88	88	88	22866.3	5 - Northeastern	16965035	23400
1761	2	54	2	1	4	5	2	0	888	888	888	0	888	888	888	888	888	888	888	1	888	99	99	99	99	22866.3	5 - Northeastern	16965035	23400
1762	2	56	2	1	7	2	2	0	888	888	888	0	888	888	888	888	888	888	888	1	888	88	88	88	88	22866.3	5 - Northeastern	16965035	23400
1763	2	57	2	1	3	3	2	0	888	888	888	0	888	888	888	888	888	888	888	1	888	99	99	99	99	22866.3	5 - Northeastern	16965035	23400
1764	2	60	2	1	6	2	2	0	888	888	888	0	888	888	888	888	888	888	888	1	888	99	99	99	99	22866.3	5 - Northeastern	16965035	23400
1765	2	61	2	1	7	3	2	0	888	888	888	0	888	888	888	888	888	888	888	1	888	99	99	99	99	22866.3	5 - Northeastern	16965035	23400
1766	2	63	2	1	6	2	2	0	888	888	888	0	888	888	888	888	888	888	888	1	888	88	88	88	88	22866.3	5 - Northeastern	16965035	23400
1767	2	65	2	99	6	1	2	0	888	888	888	0	888	888	888	888	888	888	888	1	888	88	88	88	88	22866.3	5 - Northeastern	16965035	23400
1768	1	20	1	2	9	3	2	0	888	888	888	0	888	888	888	888	888	888	888	1	888	99	99	99	99	23157.3	5 - Northeastern	16965035	23400
1769	1	22	1	2	2	2	2	1	999	4	5	5	10	0	0	0	0	0	9	1	888	1	88	88	88	23157.3	5 - Northeastern	16965035	23400
1770	1	24	1	1	5	2	2	1	888	1	2	9	9	0	0	0	1	1	4	3	4	1	88	88	88	23157.3	5 - Northeastern	16965035	23400
1771	1	29	3	2	2	2	2	0	888	888	888	0	888	888	888	888	888	888	888	1	888	88	88	99	99	23157.3	5 - Northeastern	16965035	23400
1772	1	31	1	4	3	4	2	0	888	888	888	0	888	888	888	888	888	888	888	3	4	88	88	88	88	23638.7	5 - Northeastern	16965035	23400
1773	1	32	1	3	2	3	2	0	888	888	888	0	888	888	888	888	888	888	888	1	888	99	99	99	99	23638.7	5 - Northeastern	16965035	23400
1774	1	34	3	2	2	3	2	1	888	4	5	9	10	0	0	0	0	0	2	3	4	88	88	88	88	23638.7	5 - Northeastern	16965035	23400
1775	1	37	1	2	2	3	2	0	888	888	888	0	888	888	888	888	888	888	888	1	888	88	88	88	88	23638.7	5 - Northeastern	16965035	23400
1776	1	39	5	1	5	2	2	1	999	3	5	6	10	0	0	0	0	0	2	3	4	2	88	88	88	23638.7	5 - Northeastern	16965035	23400
1777	1	40	2	1	7	2	2	0	888	888	888	0	888	888	888	888	888	888	888	3	4	99	99	99	99	23745.8	5 - Northeastern	16965035	23400
1778	1	43	2	2	2	3	2	0	888	888	888	0	888	888	888	888	888	888	888	3	4	99	99	99	99	23745.8	5 - Northeastern	16965035	23400
1779	1	49	2	2	2	3	2	0	888	888	888	0	888	888	888	888	888	888	888	3	4	88	88	88	88	23745.8	5 - Northeastern	16965035	23400
1780	1	43	3	1	5	2	2	0	888	888	888	0	888	888	888	888	888	888	888	3	4	88	88	88	88	23745.8	5 - Northeastern	16965035	23400
1781	1	47	2	1	5	2	2	1	888	4	5	0	888	888	888	888	888	888	888	1	888	99	99	99	99	23745.8	5 - Northeastern	16965035	23400
1782	1	51	2	1	5	3	2	0	888	888	888	0	888	888	888	888	888	888	888	3	4	99	99	2	99	23346.2	5 - Northeastern	16965035	23400
1783	1	52	2	1	5	2	2	0	888	888	888	0	888	888	888	888	888	888	888	3	4	99	99	99	99	23346.2	5 - Northeastern	16965035	23400
1784	1	53	2	1	5	3	2	0	888	888	888	0	888	888	888	888	888	888	888	3	4	88	88	88	88	23346.2	5 - Northeastern	16965035	23400
1785	1	54	2	1	5	2	2	0	888	888	888	0	888	888	888	888	888	888	888	1	888	88	88	88	88	23346.2	5 - Northeastern	16965035	23400
1786	1	55	3	1	3	3	2	1	888	2	5	5	10	0	0	0	0	0	2	1	888	2	88	88	88	23346.2	5 - Northeastern	16965035	23400
1787	1	57	2	1	3	3	2	0	888	888	888	0	888	888	888	888	888	888	888	1	888	88	88	88	88	23346.2	5 - Northeastern	16965035	23400
1788	1	57	2	1	7	1	2	0	888	888	888	0	888	888	888	888	888	888	888	3	1	88	88	88	88	23346.2	5 - Northeastern	16965035	23400
1789	1	59	4	1	7	1	2	0	888	888	888	0	888	888	888	888	888	888	888	3	1	99	99	99	99	23346.2	5 - Northeastern	16965035	23400
1790	1	59	99	1	6	1	2	0	888	888	888	0	888	888	888	888	888	888	888	1	888	99	99	99	99	23346.2	5 - Northeastern	16965035	23400
1791	2	21	1	2	2	2	2	0	888	888	888	0	888	888	888	888	888	888	888	1	888	88	88	88	88	22843.1	5 - Northeastern	16965035	23400
1792	2	28	1	2	2	2	2	0	888	888	888	0	888	888	888	888	888	888	888	1	888	99	99	99	2	22843.1	5 - Northeastern	16965035	23400
1793	2	29	1	2	2	3	2	0	888	888	888	0	888	888	888	888	888	888	888	1	888	99	99	99	2	22843.1	5 - Northeastern	16965035	23400
1794	2	31	1	2	2	3	2	0	888	888	888	0	888	888	888	888	888	888	888	1	888	2	88	88	88	23892.3	5 - Northeastern	16965035	23400
1795	2	34	1	6	1	4	2	0	888	888	888	0	888	888	888	888	888	888	888	1	888	88	88	88	88	23892.3	5 - Northeastern	16965035	23400
1796	2	34	1	2	2	3	2	0	888	888	888	0	888	888	888	888	888	888	888	1	888	88	88	88	88	23892.3	5 - Northeastern	16965035	23400
1797	2	36	2	2	3	3	2	0	888	888	888	0	888	888	888	888	888	888	888	1	888	88	88	99	99	23892.3	5 - Northeastern	16965035	23400
1798	2	39	3	2	2	2	2	0	888	888	888	0	888	888	888	888	888	888	888	1	888	88	88	3	88	23892.3	5 - Northeastern	16965035	23400
1799	2	41	3	3	6	2	2	0	888	888	888	0	888	888	888	888	888	888	888	1	888	88	88	88	88	22134.8	5 - Northeastern	16965035	23400
1800	2	40	2	2	3	2	99	0	888	888	888	0	888	888	888	888	888	888	888	1	888	3	88	88	88	22134.8	5 - Northeastern	16965035	23400
1801	2	43	2	2	3	3	2	0	888	888	888	0	888	888	888	888	888	888	888	1	888	88	88	88	88	22134.8	5 - Northeastern	16965035	23400
1802	2	44	2	1	7	1	2	0	888	888	888	0	888	888	888	888	888	888	888	1	888	99	99	99	99	22134.8	5 - Northeastern	16965035	23400
1803	2	49	2	1	7	2	2	1	888	3	5	6	10	0	0	0	0	0	9	1	888	2	88	88	88	22134.8	5 - Northeastern	16965035	23400
1804	2	51	4	1	3	2	2	0	888	888	888	0	888	888	888	888	888	888	888	1	888	88	88	88	88	22866.3	5 - Northeastern	16965035	23400
1805	2	52	3	1	7	1	2	0	888	888	888	0	888	888	888	888	888	888	888	1	888	88	88	88	88	22866.3	5 - Northeastern	16965035	23400
1806	2	53	2	1	3	2	2	0	888	888	888	0	888	888	888	888	888	888	888	1	888	99	99	99	99	22866.3	5 - Northeastern	16965035	23400
1807	2	53	2	1	3	3	2	0	888	888	888	0	888	888	888	888	888	888	888	1	888	88	88	88	88	22866.3	5 - Northeastern	16965035	23400
1808	2	56	2	1	7	1	2	0	888	888	888	0	888	888	888	888	888	888	888	1	888	99	99	99	99	22866.3	5 - Northeastern	16965035	23400
1809	2	59	4	1	5	2	2	0	888	888	888	0	888	888	888	888	888	888	888	1	888	2	88	88	88	22866.3	5 - Northeastern	16965035	23400
1810	2	62	2	1	3	3	2	0	888	888	888	0	888	888	888	888	888	888	888	1	888	99	99	99	3	22866.3	5 - Northeastern	16965035	23400
1811	2	64	2	1	6	1	2	0	888	888	888	0	888	888	888	888	888	888	888	1	888	99	99	99	99	22866.3	5 - Northeastern	16965035	23400
1812	2	68	4	1	6	1	2	1	888	2	5	5	10	0	0	0	0	0	4	1	888	1	88	88	88	22866.3	5 - Northeastern	16965035	23400
1813	2	70	4	1	6	1	2	0	888	888	888	0	888	888	888	888	888	888	888	1	888	99	99	99	99	22866.3	5 - Northeastern	16965035	23400
1814	2	75	4	1	6	1	2	0	888	888	888	0	888	888	888	888	888	888	888	1	888	99	99	99	99	22866.3	5 - Northeastern	16965035	23400
1815	2	78	4	1	6	1	2	0	888	888	888	0	888	888	888	888	888	888	888	1	888	99	99	99	99	22866.3	5 - Northeastern	16965035	23400
1816	1	50	2	4	7	1	2	0	888	888	888	0	888	888	888	888	888	888	888	3	1	88	88	88	88	23346.2	5 - Northeastern	16965035	23400
1817	1	53	3	1	7	2	2	1	50	1	5	3	1	0	0	0	0	0	0	3	4	4	6	88	88	23346.2	5 - Northeastern	16965035	23400
1818	1	57	3	1	7	1	2	1	52	1	5	0	888	888	888	888	888	888	888	3	4	2	2	4	88	23346.2	5 - Northeastern	16965035	23400
1819	1	52	4	2	7	2	2	0	888	888	888	0	888	888	888	888	888	888	888	3	4	88	88	88	88	23346.2	5 - Northeastern	16965035	23400
1820	1	58	3	3	7	1	2	1	55	1	5	1	10	0	0	0	0	0	0	3	4	1	2	88	88	23346.2	5 - Northeastern	16965035	23400
1821	1	53	3	1	7	2	2	0	888	888	888	0	888	888	888	888	888	888	888	3	4	2	2	2	88	23346.2	5 - Northeastern	16965035	23400
1822	1	56	3	1	5	3	2	1	50	1	5	2	10	0	0	1	0	0	0	3	1	3	3	3	3	23346.2	5 - Northeastern	16965035	23400
1823	1	42	2	6	4	5	2	0	888	888	888	0	888	888	888	888	888	888	888	3	4	88	88	88	88	23745.8	5 - Northeastern	16965035	23400
1824	1	49	2	1	5	3	2	1	40	1	3	3	9	0	0	0	0	0	0	3	4	5	5	88	88	23745.8	5 - Northeastern	16965035	23400
1825	1	45	2	2	7	1	2	1	44	1	5	1	10	0	0	0	0	0	0	3	1	2	2	2	88	23745.8	5 - Northeastern	16965035	23400
1826	1	46	2	2	7	2	2	1	43	1	5	1	10	0	0	0	0	0	0	3	4	3	4	4	88	23745.8	5 - Northeastern	16965035	23400
1827	1	34	2	2	5	3	2	0	888	888	888	0	888	888	888	888	888	888	888	3	4	88	88	88	88	23638.7	5 - Northeastern	16965035	23400
1828	1	38	2	4	7	2	2	1	37	1	5	1	10	0	0	0	0	0	0	3	4	1	1	2	2	23638.7	5 - Northeastern	16965035	23400
1829	1	31	2	3	2	4	2	0	888	888	888	0	888	888	888	888	888	888	888	3	4	88	88	88	1	23638.7	5 - Northeastern	16965035	23400
1830	1	25	1	2	5	2	2	0	888	888	888	0	888	888	888	888	888	888	888	3	4	3	3	4	4	23157.3	5 - Northeastern	16965035	23400
1831	1	22	1	3	2	4	2	1	18	1	5	1	10	0	0	0	0	0	0	3	4	2	2	3	3	23157.3	5 - Northeastern	16965035	23400
1832	1	27	3	2	7	2	2	1	24	1	1	3	2	0	9	9	0	0	2	3	4	4	4	88	88	23157.3	5 - Northeastern	16965035	23400
1833	2	27	3	2	7	2	2	1	22	1	5	1	10	0	0	0	0	0	0	1	888	2	4	88	88	22843.1	5 - Northeastern	16965035	23400
1834	2	26	1	3	5	3	2	0	888	888	888	0	888	888	888	888	888	888	888	1	888	88	88	88	88	22843.1	5 - Northeastern	16965035	23400
1835	2	26	1	4	5	3	2	0	888	888	888	0	888	888	888	888	888	888	888	1	888	88	88	88	88	22843.1	5 - Northeastern	16965035	23400
1836	2	32	3	2	7	2	2	0	888	888	888	0	888	888	888	888	888	888	888	1	888	88	88	88	88	23892.3	5 - Northeastern	16965035	23400
1837	2	35	3	2	7	4	2	1	33	1	5	0	888	888	888	888	888	888	888	1	888	88	88	88	88	23892.3	5 - Northeastern	16965035	23400
1838	2	43	3	2	7	1	2	1	38	1	5	1	10	0	0	0	0	0	0	1	888	2	4	88	88	22134.8	5 - Northeastern	16965035	23400
1839	2	42	2	6	2	5	2	1	35	1	5	0	888	888	888	888	888	888	888	1	888	3	3	10	10	22134.8	5 - Northeastern	16965035	23400
1840	2	47	2	1	7	2	2	0	888	888	888	0	888	888	888	888	888	888	888	1	888	88	88	88	88	22134.8	5 - Northeastern	16965035	23400
1841	2	44	1	4	4	6	2	1	40	1	5	1	10	0	0	0	0	0	0	1	888	3	3	3	88	22134.8	5 - Northeastern	16965035	23400
1842	2	57	3	2	7	2	2	1	53	1	5	1	10	0	0	0	0	0	0	1	888	2	2	88	88	22866.3	5 - Northeastern	16965035	23400
1843	2	54	3	1	7	2	2	0	888	888	888	0	888	888	888	888	888	888	888	1	888	88	99	88	88	22866.3	5 - Northeastern	16965035	23400
1844	2	51	3	6	1	6	2	0	888	888	888	0	888	888	888	888	888	888	888	1	888	88	88	88	88	22866.3	5 - Northeastern	16965035	23400
1845	2	53	2	2	7	2	2	0	888	888	888	0	888	888	888	888	888	888	888	1	888	88	88	88	88	22866.3	5 - Northeastern	16965035	23400
1846	2	51	3	1	7	2	2	1	48	1	5	0	888	888	888	888	888	888	888	1	888	1	1	2	2	22866.3	5 - Northeastern	16965035	23400
1847	2	58	3	1	7	1	2	0	888	888	888	0	888	888	888	888	888	888	888	1	888	2	2	3	4	22866.3	5 - Northeastern	16965035	23400
1848	2	52	2	2	4	6	2	0	888	888	888	0	888	888	888	888	888	888	888	1	888	88	88	88	88	22866.3	5 - Northeastern	16965035	23400
1849	2	60	3	1	7	1	2	1	57	1	5	0	888	888	888	888	888	888	888	1	888	2	2	2	2	22866.3	5 - Northeastern	16965035	23400
1850	2	53	3	1	7	1	2	0	888	888	888	0	888	888	888	888	888	888	888	1	888	88	88	1	1	22866.3	5 - Northeastern	16965035	23400
1851	2	45	2	2	2	3	2	0	888	888	888	0	888	888	888	888	888	888	888	1	888	88	88	88	88	22134.8	5 - Northeastern	16965035	23400
1852	2	41	2	3	5	3	2	0	888	888	888	0	888	888	888	888	888	888	888	1	888	88	88	88	88	22134.8	5 - Northeastern	16965035	23400
1853	2	36	2	4	4	4	2	0	888	888	888	0	888	888	888	888	888	888	888	1	888	88	88	88	88	23892.3	5 - Northeastern	16965035	23400
1854	2	32	2	2	3	3	2	0	888	888	888	0	888	888	888	888	888	888	888	1	888	88	88	88	88	23892.3	5 - Northeastern	16965035	23400
1855	2	27	1	4	2	3	2	0	888	888	888	0	888	888	888	888	888	888	888	1	888	88	88	88	88	22843.1	5 - Northeastern	16965035	23400
1856	2	21	1	3	11	2	2	1	999	1	2	0	888	888	888	888	888	888	888	1	888	88	88	88	88	22843.1	5 - Northeastern	16965035	23400
1857	1	64	2	1	5	2	2	1	999	3	6	0	888	888	888	888	888	888	888	2	1	88	88	88	88	23346.2	5 - Northeastern	16965035	23400
1858	1	33	1	3	3	3	2	1	888	4	5	0	888	888	888	888	888	888	888	3	4	88	88	88	88	23638.7	5 - Northeastern	16965035	23400
1859	1	38	2	4	5	3	2	0	888	888	888	0	888	888	888	888	888	888	888	3	4	88	88	88	88	23638.7	5 - Northeastern	16965035	23400
1860	1	43	2	2	2	5	2	0	888	888	888	0	888	888	888	888	888	888	888	3	4	88	88	88	88	23745.8	5 - Northeastern	16965035	23400
1861	1	49	2	3	2	5	2	0	888	888	888	0	888	888	888	888	888	888	888	3	4	99	99	99	99	23745.8	5 - Northeastern	16965035	23400
1862	1	52	2	3	2	3	2	0	888	888	888	0	888	888	888	888	888	888	888	1	888	99	99	99	99	23346.2	5 - Northeastern	16965035	23400
1863	1	56	2	2	5	4	2	0	888	888	888	0	888	888	888	888	888	888	888	2	999	88	88	88	88	23346.2	5 - Northeastern	16965035	23400
1864	1	62	2	2	6	2	2	1	888	4	5	0	888	888	888	888	888	888	888	3	4	88	88	88	88	23346.2	5 - Northeastern	16965035	23400
1865	1	26	1	3	5	4	2	0	888	888	888	0	888	888	888	888	888	888	888	3	4	88	88	88	88	23157.3	5 - Northeastern	16965035	23400
1866	1	23	1	2	2	3	2	0	888	888	888	0	888	888	888	888	888	888	888	3	4	88	88	88	88	23157.3	5 - Northeastern	16965035	23400
1867	2	22	1	3	2	3	2	0	888	888	888	0	888	888	888	888	888	888	888	1	888	1	2	88	88	22843.1	5 - Northeastern	16965035	23400
1868	2	25	1	2	2	3	2	0	888	888	888	0	888	888	888	888	888	888	888	1	888	99	99	99	99	22843.1	5 - Northeastern	16965035	23400
1869	2	31	2	1	7	1	2	0	888	888	888	0	888	888	888	888	888	888	888	1	888	88	88	88	88	23892.3	5 - Northeastern	16965035	23400
1870	2	34	1	2	3	4	2	0	888	888	888	0	888	888	888	888	888	888	888	1	888	88	88	88	88	23892.3	5 - Northeastern	16965035	23400
1871	2	40	2	1	7	1	2	0	888	888	888	0	888	888	888	888	888	888	888	1	888	99	99	99	99	22134.8	5 - Northeastern	16965035	23400
1872	2	45	2	1	7	2	2	0	888	888	888	0	888	888	888	888	888	888	888	1	888	99	99	99	99	22134.8	5 - Northeastern	16965035	23400
1873	2	52	2	1	3	3	2	1	999	3	5	5	10	0	0	0	0	0	2	1	888	88	88	2	88	22866.3	5 - Northeastern	16965035	23400
1874	2	57	2	1	7	1	2	0	888	888	888	0	888	888	888	888	888	888	888	1	888	88	88	88	88	22866.3	5 - Northeastern	16965035	23400
1875	2	60	2	1	6	1	2	0	888	888	888	0	888	888	888	888	888	888	888	1	888	99	99	99	99	22866.3	5 - Northeastern	16965035	23400
1876	2	70	2	1	7	1	2	1	70	3	5	6	10	0	0	0	0	0	2	1	888	88	88	88	88	22866.3	5 - Northeastern	16965035	23400
1877	1	21	1	2	2	3	2	0	888	888	888	0	888	888	888	888	888	888	888	1	888	88	88	88	88	23157.3	5 - Northeastern	16965035	23400
1878	1	28	1	2	2	3	2	1	888	4	5	5	10	0	0	0	0	0	2	1	888	88	88	88	88	23157.3	5 - Northeastern	16965035	23400
1879	1	34	1	2	2	3	2	0	888	888	888	0	888	888	888	888	888	888	888	3	4	88	88	88	88	23638.7	5 - Northeastern	16965035	23400
1880	1	37	2	2	5	3	2	0	888	888	888	0	888	888	888	888	888	888	888	3	4	88	2	88	88	23638.7	5 - Northeastern	16965035	23400
1881	1	40	2	1	5	2	2	0	888	888	888	0	888	888	888	888	888	888	888	3	4	99	99	99	99	23745.8	5 - Northeastern	16965035	23400
1882	1	48	2	2	3	3	2	0	888	888	888	0	888	888	888	888	888	888	888	1	888	3	88	88	88	23745.8	5 - Northeastern	16965035	23400
1883	1	55	2	1	7	1	2	0	888	888	888	0	888	888	888	888	888	888	888	1	888	88	88	88	88	23346.2	5 - Northeastern	16965035	23400
1884	1	58	2	1	5	2	2	0	888	888	888	0	888	888	888	888	888	888	888	3	4	99	99	99	99	23346.2	5 - Northeastern	16965035	23400
1885	1	59	4	1	7	1	2	0	888	888	888	0	888	888	888	888	888	888	888	1	888	99	99	99	99	23346.2	5 - Northeastern	16965035	23400
1886	1	60	4	1	7	1	2	0	888	888	888	0	888	888	888	888	888	888	888	1	888	88	88	88	88	23346.2	5 - Northeastern	16965035	23400
1887	2	56	2	1	7	3	2	0	888	888	888	0	888	888	888	888	888	888	888	1	888	88	88	88	88	22866.3	5 - Northeastern	16965035	23400
1888	2	62	2	1	7	2	2	0	888	888	888	0	888	888	888	888	888	888	888	3	4	88	88	88	88	22866.3	5 - Northeastern	16965035	23400
1889	2	55	2	2	4	6	2	0	888	888	888	0	888	888	888	888	888	888	888	1	888	99	99	99	99	22866.3	5 - Northeastern	16965035	23400
1890	2	52	2	3	2	4	2	0	888	888	888	0	888	888	888	888	888	888	888	1	888	88	88	88	88	22866.3	5 - Northeastern	16965035	23400
1891	2	32	2	2	3	3	2	0	888	888	888	0	888	888	888	888	888	888	888	1	888	1	1	1	1	23892.3	6 - Southern	6930355	23024.4
1892	2	33	3	2	3	4	2	0	888	888	888	0	888	888	888	888	888	888	888	1	888	88	88	88	88	23892.3	6 - Southern	6930355	23024.4
1893	2	36	2	2	2	3	2	1	35	3	5	0	888	888	888	888	888	888	888	1	888	99	99	99	99	23892.3	6 - Southern	6930355	23024.4
1894	2	23	1	1	5	3	2	1	20	1	1	0	888	888	888	888	888	888	888	1	888	88	88	88	88	22843.1	6 - Southern	6930355	23024.4
1895	2	20	1	3	10	1	2	1	19	1	5	5	10	0	0	0	0	0	0	1	888	88	88	88	88	22843.1	6 - Southern	6930355	23024.4
1896	2	20	1	2	10	1	2	0	888	888	888	0	888	888	888	888	888	888	888	1	888	88	88	88	88	22843.1	6 - Southern	6930355	23024.4
1897	2	48	2	2	5	3	2	0	888	888	888	0	888	888	888	888	888	888	888	1	888	88	88	88	88	22134.8	6 - Southern	6930355	23024.4
1898	2	45	2	1	7	2	2	0	888	888	888	0	888	888	888	888	888	888	888	1	888	88	88	88	88	22134.8	6 - Southern	6930355	23024.4
1899	2	48	2	6	1	8	2	0	888	888	888	0	888	888	888	888	888	888	888	1	888	88	88	88	88	22134.8	6 - Southern	6930355	23024.4
1900	2	71	2	1	3	4	2	0	888	888	888	0	888	888	888	888	888	888	888	1	888	88	88	88	88	22866.3	6 - Southern	6930355	23024.4
1901	2	58	2	1	5	2	2	0	888	888	888	0	888	888	888	888	888	888	888	1	888	3	3	3	3	22866.3	6 - Southern	6930355	23024.4
1902	2	60	2	1	3	2	2	0	888	888	888	0	888	888	888	888	888	888	888	1	888	0	0	2	2	22866.3	6 - Southern	6930355	23024.4
1903	2	51	3	2	3	2	2	1	48	3	5	0	888	888	888	888	888	888	888	1	888	99	99	99	99	22866.3	6 - Southern	6930355	23024.4
1904	2	65	1	6	6	3	2	0	888	888	888	0	888	888	888	888	888	888	888	1	888	99	99	99	99	22866.3	6 - Southern	6930355	23024.4
1905	2	56	2	1	5	2	2	0	888	888	888	0	888	888	888	888	888	888	888	1	888	99	99	99	99	22866.3	6 - Southern	6930355	23024.4
1906	2	55	2	1	3	4	2	0	888	888	888	0	888	888	888	888	888	888	888	1	888	0	0	0	2	22866.3	6 - Southern	6930355	23024.4
1907	1	28	2	3	5	3	2	1	15	1	1	6	0	0	0	0	0	0	0	3	4	88	88	88	88	23157.3	6 - Southern	6930355	23024.4
1908	1	26	1	2	5	2	2	1	18	1	2	4	10	0	0	0	0	0	0	3	4	88	88	88	88	23157.3	6 - Southern	6930355	23024.4
1909	1	29	2	4	1	4	2	0	888	888	888	0	888	888	888	888	888	888	888	3	4	1	1	5	5	23157.3	6 - Southern	6930355	23024.4
1910	1	30	1	1	5	3	2	0	888	888	888	0	888	888	888	888	888	888	888	3	4	88	88	88	88	23638.7	6 - Southern	6930355	23024.4
1911	1	38	1	2	3	6	2	1	16	1	2	6	0	0	0	0	0	0	0	3	4	1	1	1	1	23638.7	6 - Southern	6930355	23024.4
1912	1	38	1	1	5	3	2	0	888	888	888	0	888	888	888	888	888	888	888	3	4	99	99	99	99	23638.7	6 - Southern	6930355	23024.4
1913	1	48	2	2	5	3	2	1	888	1	2	0	888	888	888	888	888	888	888	3	4	88	88	1	3	23745.8	6 - Southern	6930355	23024.4
1914	1	41	2	2	5	2	2	1	15	1	3	0	888	888	888	888	888	888	888	3	4	99	99	99	99	23745.8	6 - Southern	6930355	23024.4
1915	1	50	2	1	5	2	2	1	20	1	3	0	888	888	888	888	888	888	888	3	4	99	99	99	99	23346.2	6 - Southern	6930355	23024.4
1916	1	60	2	6	1	5	2	1	15	1	2	0	888	888	888	888	888	888	888	3	4	88	88	88	88	23346.2	6 - Southern	6930355	23024.4
1917	1	64	3	1	5	2	2	1	15	1	2	0	888	888	888	888	888	888	888	3	4	2	4	4	4	23346.2	6 - Southern	6930355	23024.4
1918	1	53	2	6	3	5	2	1	30	4	5	0	888	888	888	888	888	888	888	3	4	0	1	1	1	23346.2	6 - Southern	6930355	23024.4
1919	1	59	2	1	5	2	2	0	888	888	888	0	888	888	888	888	888	888	888	3	4	99	99	99	99	23346.2	6 - Southern	6930355	23024.4
1920	1	49	2	7	1	8	2	1	15	3	5	6	10	0	0	0	0	0	0	2	4	88	88	88	88	23745.8	6 - Southern	6930355	23024.4
1921	1	48	2	4	7	2	2	1	25	1	2	0	888	888	888	888	888	888	888	3	4	88	88	88	88	23745.8	6 - Southern	6930355	23024.4
1922	1	47	2	1	3	4	2	1	41	3	5	7	0	0	0	0	0	0	0	3	4	88	88	88	88	23745.8	6 - Southern	6930355	23024.4
1923	1	46	2	4	2	5	2	1	16	1	2	0	888	888	888	888	888	888	888	2	1	1	2	3	5	23745.8	6 - Southern	6930355	23024.4
1924	1	48	4	2	7	3	2	1	888	1	2	0	888	888	888	888	888	888	888	3	4	1	3	3	3	23745.8	6 - Southern	6930355	23024.4
1925	1	42	2	1	5	2	2	0	888	888	888	0	888	888	888	888	888	888	888	3	4	88	88	88	88	23745.8	6 - Southern	6930355	23024.4
1926	1	70	2	1	11	2	2	0	888	888	888	0	888	888	888	888	888	888	888	2	1	1	1	1	1	23346.2	6 - Southern	6930355	23024.4
1927	1	62	3	2	5	2	2	1	20	1	2	0	888	888	888	888	888	888	888	1	888	0	2	2	2	23346.2	6 - Southern	6930355	23024.4
1928	1	57	2	99	7	3	2	0	888	888	888	0	888	888	888	888	888	888	888	1	888	88	88	88	88	23346.2	6 - Southern	6930355	23024.4
1929	1	58	4	1	5	3	2	1	20	1	2	8	0	0	0	0	0	0	0	3	4	2	3	3	3	23346.2	6 - Southern	6930355	23024.4
1930	1	51	4	2	3	3	2	0	888	888	888	0	888	888	888	888	888	888	888	1	888	88	88	88	88	23346.2	6 - Southern	6930355	23024.4
1931	1	54	2	1	5	3	2	0	888	888	888	0	888	888	888	888	888	888	888	3	4	88	88	88	88	23346.2	6 - Southern	6930355	23024.4
1932	1	65	2	1	7	2	2	0	888	888	888	0	888	888	888	888	888	888	888	3	4	88	88	88	88	23346.2	6 - Southern	6930355	23024.4
1933	1	71	2	2	5	4	2	0	888	888	888	0	888	888	888	888	888	888	888	1	888	88	88	88	88	23346.2	6 - Southern	6930355	23024.4
1934	1	66	4	1	5	2	2	0	888	888	888	0	888	888	888	888	888	888	888	1	888	88	88	88	88	23346.2	6 - Southern	6930355	23024.4
1935	1	53	2	4	5	2	2	1	19	1	3	0	888	888	888	888	888	888	888	3	4	88	88	88	88	23346.2	6 - Southern	6930355	23024.4
1936	1	64	2	1	6	1	2	1	18	1	2	0	888	888	888	888	888	888	888	3	4	88	88	88	88	23346.2	6 - Southern	6930355	23024.4
1937	1	72	2	4	6	2	2	1	69	3	5	8	10	0	0	0	0	0	9	3	4	88	88	88	88	23346.2	6 - Southern	6930355	23024.4
1938	1	54	1	2	5	3	2	1	18	1	2	7	10	0	0	0	0	0	0	3	4	88	88	88	88	23346.2	6 - Southern	6930355	23024.4
1939	1	50	3	1	3	4	2	1	16	4	5	6	10	0	0	0	0	0	0	2	4	1	1	1	1	23346.2	6 - Southern	6930355	23024.4
1940	1	74	4	1	11	1	2	0	888	888	888	0	888	888	888	888	888	888	888	3	4	88	88	88	88	23346.2	6 - Southern	6930355	23024.4
1941	1	53	3	1	5	3	2	0	888	888	888	0	888	888	888	888	888	888	888	2	4	88	88	88	88	23346.2	6 - Southern	6930355	23024.4
1942	1	20	1	4	10	1	2	0	888	888	888	0	888	888	888	888	888	888	888	1	888	88	88	88	88	23157.3	6 - Southern	6930355	23024.4
1943	1	22	1	3	10	2	2	1	20	1	2	0	888	888	888	888	888	888	888	3	4	1	1	1	1	23157.3	6 - Southern	6930355	23024.4
1944	1	29	1	3	11	1	2	0	888	888	888	0	888	888	888	888	888	888	888	3	4	99	99	99	99	23157.3	6 - Southern	6930355	23024.4
1945	1	20	1	2	10	2	2	0	888	888	888	0	888	888	888	888	888	888	888	3	2	88	88	88	88	23157.3	6 - Southern	6930355	23024.4
1946	1	29	2	2	5	3	2	1	20	1	2	3	0	0	0	0	0	0	0	3	4	2	2	2	2	23157.3	6 - Southern	6930355	23024.4
1947	1	27	2	2	5	5	2	1	18	1	2	7	0	0	0	0	0	0	0	3	4	88	1	1	1	23157.3	6 - Southern	6930355	23024.4
1948	1	29	1	1	3	2	2	1	18	1	2	8	9	9	0	0	0	0	0	1	888	1	1	1	1	23157.3	6 - Southern	6930355	23024.4
1949	1	23	3	1	5	3	1	0	888	888	888	0	888	888	888	888	888	888	888	3	4	1	3	3	3	23157.3	6 - Southern	6930355	23024.4
1950	1	38	2	4	2	4	2	1	20	1	2	8	0	0	0	0	0	0	0	3	4	88	88	88	88	23638.7	6 - Southern	6930355	23024.4
1951	1	35	1	4	1	3	1	1	18	1	2	0	888	888	888	888	888	888	888	3	4	1	3	4	4	23638.7	6 - Southern	6930355	23024.4
1952	1	35	4	3	3	5	2	0	888	888	888	0	888	888	888	888	888	888	888	2	1	88	88	88	88	23638.7	6 - Southern	6930355	23024.4
1953	1	36	3	1	5	2	2	1	18	1	2	0	888	888	888	888	888	888	888	1	888	2	2	2	2	23638.7	6 - Southern	6930355	23024.4
1954	1	34	2	1	5	2	2	1	18	1	2	0	888	888	888	888	888	888	888	3	4	2	5	6	8	23638.7	6 - Southern	6930355	23024.4
1955	1	35	2	2	9	3	2	1	18	1	1	0	888	888	888	888	888	888	888	3	4	1	1	1	1	23638.7	6 - Southern	6930355	23024.4
1956	1	39	2	4	5	4	2	0	888	888	888	0	888	888	888	888	888	888	888	3	4	1	3	3	3	23638.7	6 - Southern	6930355	23024.4
1957	1	49	2	1	5	3	2	0	888	888	888	0	888	888	888	888	888	888	888	3	4	88	88	88	88	23745.8	6 - Southern	6930355	23024.4
1958	2	29	2	1	3	2	2	1	20	3	5	3	10	0	0	0	0	0	0	1	888	0	0	2	2	22843.1	6 - Southern	6930355	23024.4
1959	2	21	1	2	10	1	2	1	18	4	5	0	888	888	888	888	888	888	888	1	888	0	0	0	2	22843.1	6 - Southern	6930355	23024.4
1960	2	27	2	3	2	3	2	0	888	888	888	0	888	888	888	888	888	888	888	1	888	88	88	88	88	22843.1	6 - Southern	6930355	23024.4
1961	2	25	2	1	3	3	1	1	999	3	5	3	10	0	0	0	0	0	0	1	888	0	0	0	0	22843.1	6 - Southern	6930355	23024.4
1962	2	29	2	3	3	5	2	0	888	888	888	0	888	888	888	888	888	888	888	1	888	1	1	1	1	22843.1	6 - Southern	6930355	23024.4
1963	2	27	2	3	5	5	1	1	25	3	5	6	10	0	0	0	0	0	0	1	888	0	1	1	1	22843.1	6 - Southern	6930355	23024.4
1964	2	22	1	1	10	1	1	1	888	3	5	5	10	0	0	0	0	0	0	1	888	88	88	88	88	22843.1	6 - Southern	6930355	23024.4
1965	2	53	2	1	5	3	2	1	32	3	5	5	10	0	0	0	0	0	0	1	888	0	0	0	1	22866.3	6 - Southern	6930355	23024.4
1966	2	38	2	1	7	3	2	1	35	1	5	5	10	0	0	0	0	0	0	1	888	0	1	1	1	23892.3	6 - Southern	6930355	23024.4
1967	2	35	4	1	5	3	2	1	30	4	5	6	10	0	0	0	0	0	0	1	888	0	0	0	1	23892.3	6 - Southern	6930355	23024.4
1968	2	30	2	2	7	2	2	1	28	3	5	6	10	0	0	0	0	0	0	2	1	88	88	88	88	23892.3	6 - Southern	6930355	23024.4
1969	2	39	2	1	3	6	2	1	888	1	5	4	0	0	0	0	0	0	0	1	888	1	1	1	1	23892.3	6 - Southern	6930355	23024.4
1970	2	32	4	1	5	3	2	1	888	1	5	2	10	0	0	0	0	0	0	1	888	0	0	1	1	23892.3	6 - Southern	6930355	23024.4
1971	2	32	1	6	12	4	2	1	888	1	5	4	10	0	0	0	0	0	0	1	888	1	1	1	1	23892.3	6 - Southern	6930355	23024.4
1972	2	43	2	2	2	3	1	0	888	888	888	0	888	888	888	888	888	888	888	1	888	0	0	2	2	22134.8	6 - Southern	6930355	23024.4
1973	2	40	2	6	3	2	2	0	888	888	888	0	888	888	888	888	888	888	888	1	888	88	88	88	88	22134.8	6 - Southern	6930355	23024.4
1974	2	40	1	6	3	2	2	0	888	888	888	0	888	888	888	888	888	888	888	1	888	88	88	88	88	22134.8	6 - Southern	6930355	23024.4
1975	2	49	2	1	3	2	2	1	888	3	5	5	10	0	0	0	0	0	0	1	888	0	0	0	2	22134.8	6 - Southern	6930355	23024.4
1976	2	42	2	1	5	2	2	0	888	888	888	0	888	888	888	888	888	888	888	1	888	88	88	88	88	22134.8	6 - Southern	6930355	23024.4
1977	2	48	2	1	3	2	2	0	888	888	888	0	888	888	888	888	888	888	888	1	888	88	88	88	88	22134.8	6 - Southern	6930355	23024.4
1978	2	43	2	2	7	3	2	1	888	1	5	0	888	888	888	888	888	888	888	1	888	1	1	1	1	22134.8	6 - Southern	6930355	23024.4
1979	2	76	4	1	6	2	2	0	888	888	888	0	888	888	888	888	888	888	888	1	888	88	88	88	88	22866.3	6 - Southern	6930355	23024.4
1980	2	54	2	2	5	3	2	1	52	4	5	5	10	0	0	0	0	0	0	2	1	88	88	88	88	22866.3	6 - Southern	6930355	23024.4
1981	2	58	4	1	3	2	2	0	888	888	888	0	888	888	888	888	888	888	888	1	888	1	3	3	3	22866.3	6 - Southern	6930355	23024.4
1982	2	59	4	3	3	4	2	1	18	1	5	0	888	888	888	888	888	888	888	1	888	0	0	1	1	22866.3	6 - Southern	6930355	23024.4
1983	2	72	2	1	6	1	2	1	70	4	5	5	10	0	0	0	0	0	0	1	888	0	0	0	0	22866.3	6 - Southern	6930355	23024.4
1984	2	78	4	1	6	1	2	1	70	3	5	3	10	0	0	0	0	0	0	2	1	88	88	88	88	22866.3	6 - Southern	6930355	23024.4
1985	2	67	2	1	7	2	2	1	48	2	8	8	10	0	0	0	2	3	0	1	888	0	1	1	1	22866.3	6 - Southern	6930355	23024.4
1986	2	65	2	1	7	1	2	1	60	3	5	5	10	0	0	0	0	0	0	1	888	0	1	1	1	22866.3	6 - Southern	6930355	23024.4
1987	2	52	2	1	3	3	2	1	50	3	5	4	10	0	0	0	0	0	0	1	888	88	88	88	88	22866.3	6 - Southern	6930355	23024.4
1988	2	52	2	1	5	2	2	1	50	3	5	4	10	0	0	0	0	0	0	1	888	2	2	2	2	22866.3	6 - Southern	6930355	23024.4
1989	2	68	2	2	3	6	2	1	68	4	5	0	888	888	888	888	888	888	888	1	888	88	88	88	88	22866.3	6 - Southern	6930355	23024.4
1990	2	69	2	1	7	1	2	1	62	4	5	6	0	0	0	0	0	0	0	1	888	88	88	88	88	22866.3	6 - Southern	6930355	23024.4
1991	2	56	2	1	3	6	1	0	888	888	888	0	888	888	888	888	888	888	888	1	888	88	88	88	88	22866.3	6 - Southern	6930355	23024.4
1992	2	55	2	2	3	3	2	0	888	888	888	0	888	888	888	888	888	888	888	1	888	88	88	88	88	22866.3	6 - Southern	6930355	23024.4
1993	2	64	2	1	5	2	2	0	888	888	888	0	888	888	888	888	888	888	888	1	888	99	99	99	99	22866.3	6 - Southern	6930355	23024.4
1994	2	63	2	1	5	2	2	0	888	888	888	0	888	888	888	888	888	888	888	1	888	88	88	88	88	22866.3	6 - Southern	6930355	23024.4
1995	2	50	4	2	5	2	2	0	888	888	888	0	888	888	888	888	888	888	888	1	888	0	2	2	2	22866.3	6 - Southern	6930355	23024.4
1996	2	62	4	1	5	3	1	0	888	888	888	0	888	888	888	888	888	888	888	1	888	88	88	88	88	22866.3	6 - Southern	6930355	23024.4
1997	1	28	1	4	2	3	2	1	888	1	1	6	0	0	0	0	0	0	0	3	4	88	88	88	88	23157.3	6 - Southern	6930355	23024.4
1998	1	20	1	2	10	1	2	0	888	888	888	0	888	888	888	888	888	888	888	2	1	88	88	88	88	23157.3	6 - Southern	6930355	23024.4
1999	1	25	2	2	5	4	2	1	20	1	4	2	0	0	0	0	0	0	0	3	4	1	1	1	1	23157.3	6 - Southern	6930355	23024.4
[truncated: 192 more rows]

## Sheet: DataDict_questions
Question (Column)	Label
a1	Gender assigned at birth
a3	Age (text field)
a4	Marital status
a5	Education: Please specify the highest level of education completed or highest qualitifcation earned
a6	Occupation that is your primary source of income
a7	Personal Monthly Income: In the past 12 months, how much do you typically earn per month?
a9	Religion
b1_1	In this lifetime, have you ever used cannabis?
b1_3_year	Age in which you first used cannabis (if not sure, add 888; if refuse to answer, add 999)
b1_4	What is the main purpose of your cannabis use in your lifetime? (only one answer allowed)
b1_8	What is your most common method of cannabis use? (only one answer allowed)
b3_1	In the past 12 months, how often do you use cannabis?
b3_2	How many hours were you high or "floating" on a typical day when you had been using cannabis?
b3_3	How often during the past 6 months did you find that you were not able to stop using cannabis once you had started?
b3_4	How often during the past 6 months did you fail to do what was normally expected from you because of using cannabis?
b3_5	How often in the past 6 months have you devoted a great deal of your time to getting, using, or recovering from cannabis?
b3_6	How often in the past 6 months have you had a problem with your memory or concentration after using cannabis?
b3_7	How often do you use cannabis in situations that could be physically hazardous, such as driving, operating machinery, or caring for children:
b3_8	Have you ever thought about cutting down, or stopping, your use of cannabis?
b6_1	In your lifetime, have you smoked more than 5 packs or 100 sticks of cigarettes or loose-leaf tobacco?
b6_2	When was the last time you smoked?
c1_6_400m	. As you are aware, within 400 meters from your home (approximately 5 minutes' walk), how many cannabis growing and selling points are there? ................ points (if not sure, write 88; if refuse to answer, write 99)
c1_7_800m	As you are aware, within 800 meters from your home (approximately 5 minutes' walk), how many cannabis growing and selling points are there? ................ points (if not sure, write 88; if refuse to answer, write 99).
c1_8_1200m	As you are aware, within 1200 meters from your home (approximately 5 minutes' walk), how many cannabis growing and selling points are there? ................ points (if not sure, write 88; if refuse to answer, write 99).
c1_9_1600m	As you are aware, within 1600 meters from your home (approximately 5 minutes' walk), how many cannabis growing and selling points are there? ................ points (if not sure, write 88; if refuse to answer, write 99).

## Sheet: DataDict_choices
Question (Column)	Value	Answer choice
a1	1	Male
a1	2	Female
a1	3	Others
a1	99	Refuse to answer
a4	1	Single
a4	2	Married
a4	3	Co-habitation
a4	4	Widowed/Divorced
a4	5	It's complicated
a4	99	Refuse to answer
a5	1	Less than high school
a5	2	High school
a5	3	Vocational certificate
a5	4	Associate's degree
a5	5	Studied at university but did not graduate (check this box if you're currently an undergraduate student)
a5	6	Bachelor's degree
a5	7	Master's degree
a5	8	Doctorate
a5	99	Refuse to answer
a6	1	Civil servant / state enterprise
a6	2	Corporate employee
a6	3	Small-scale vendor / service provider
a6	4	Business owner / enterpreneur
a6	5	Manual labor / general worker
a6	6	Retired / homemaker
a6	7	Agriculture / fishery
a6	8	Independent professionals, e.g., lawyer, architect
a6	9	Independent occupations, e.g., delivery riders, online shops
a6	10	Student
a6	11	Unemployed
a6	12	Others
a6	99	Refuse to answer
a7	1	No more than 5,000 THB
a7	2	5,001 to 9,999 THB
a7	3	10,000 to 14,999 THB
a7	4	15,000 to 19,999 THB
a7	5	20,000 to 24,999 THB
a7	6	25,000 to 29,999 THB
a7	7	30,000 to 34,999 THB
a7	8	35,000 to 39,999 THB
a7	9	40,000 to 44,999 THB
a7	10	45,000 to 49,999 THB
a7	11	50,000 THB or more
a7	99	Refuse to answer
a9	1	Islam
a9	2	Buddhism
a9	3	Christianity
a9	4	Others
a9	99	Refuse to answer
b1_1	0. Never (skip to B2_1)
b1_1	1. Yes
b1_1	9. Refuse to answer (skip to B2_1)
b1_4	1. Recreation (for enjoyment-relaxation, socialization)
b1_4	2. Medical reason / treatment (e.g., for fatigue, cancer, seizure)
b1_4	3. As a sleep-aid
b1_4	4. To increase appetite
b1_4	5. Others
b1_4	99. Refuse to answer
b1_8	1	Rolling in a joint
b1_8	2	Mixing with cigarette
b1_8	3	Using a pipe or dry bong
b1_8	4	Using a water bong
b1_8	5	Eating or drinking
b1_8	6	Sublingual drops
b1_8	7	Suppository
b1_8	8	Ingestion of capsules
b1_8	9	Spraying / applying / bathing externally
b1_8	10	Use in electronic cigarette (voporization)
b1_8	11	Others
b1_8	99	Refuse to answer
b3_1	0	Never (skip to B4_1)
b3_1	1	1-3 times per year
b3_1	2	4-7 times per year
b3_1	3	8-11 times per year
b3_1	4	Once a month
b3_1	5	2-4 times per month
b3_1	6	2-3 times per week
b3_1	7	4-6 times per week
b3_1	8	7 times per week (daily)
b3_1	9	Refuse to answer
b3_2	0	Less than 1 hour
b3_2	1	1 or 2 hours
b3_2	2	3 or 4 hours
b3_2	3	5 or 6 hours
b3_2	4	7 hours or more
b3_2	9	Refuse to answer
b3_2	10	I don't get high
b3_3	0	Never
b3_3	1	Less than once a month
b3_3	2	Once a month
b3_3	3	Once a week
b3_3	4	Daily or almost daily
b3_3	9	Refuse to answer
b3_4	0	Never
b3_4	1	Less than once a month
b3_4	2	Once a month
b3_4	3	Once a week
b3_4	4	Daily or almost daily
b3_4	9	Refuse to answer
b3_5	0	Never
b3_5	1	Less than once a month
b3_5	2	Once a month
b3_5	3	Once a week
b3_5	4	Daily or almost daily
b3_5	9	Refuse to answer
b3_6	0	Never
b3_6	1	Less than once a month
b3_6	2	Once a month
b3_6	3	Once a week
b3_6	4	Daily or almost daily
b3_6	9	Refuse to answer
b3_7	0	Never
b3_7	1	Less than once a month
b3_7	2	Once a month
b3_7	3	Once a week
b3_7	4	Daily or almost daily
b3_7	9	Refuse to answer
b3_8	0	Never
b3_8	2	Yes, but not within the past 6 months
b3_8	4	Yes, in the past 6 months
b3_8	9	Refuse to answer
b6_1	1	I never smoked
b6_1	2	I smoked, but fewer than 5 packs or 100 sticks in total
b6_1	3	Yes
b6_2	1	More than 12 months ago
b6_2	2	More than 30 days ago but within the past 12 months
b6_2	3	More than 1 week ago but within the past 30 daysw
b6_2	4	Within the past 1 week
